# Supplementary material for: Facile construction of novel heterocyclic compounds: three-component, one-pot synthesis of 2-hydroxybenzoyl-1,2-dihydropyridine-3-carboxylates, ketones, pyridone-3-carboxylates and benzopyrido-1,3-oxazole-4-carboxylates
Source: Royal Society of Chemistry journal article supplement (doi:10.1039/c5ra10185a), 2015-01-01
Supplement: c5ra10185a1.pdf [file c5ra10185a1.pdf]

## Supporting Information

### Facile construction of novel heterocyclic compounds: Three-component, one-pot synthesis of 2-hydroxybenzoyl-1,2-dihydropyridine-3-carboxylates, ketones, pyridone-3-carboxylates, and benzopyrido-1,3-oxazole-4-carboxylates†

Kommeraj Rajkumar,<sup>ab</sup> Pathi Suman<sup>a</sup> and Bhimapaka China Raju<sup>\*ab</sup>

<sup>a</sup>Natural Products Chemistry Division, CSIR-Indian Institute of Chemical Technology, Hyderabad-500 007, India. Fax: (+91)-4027160512, E-mail: [chinaraju@iict.res.in](mailto:chinaraju@iict.res.in)

Homepage: <http://www.iictindia.org>

<sup>b</sup>AcSIR-Indian Institute of Chemical Technology, Hyderabad-500 007, India.

|                                                                                                                                                             |                |
|-------------------------------------------------------------------------------------------------------------------------------------------------------------|----------------|
| <b>1: General information</b>                                                                                                                               | <b>S2</b>      |
| <b>2: General procedure for the preparation of ethyl 2-hydroxy-5-(2-hydroxybenzoyl)-1-phenyl-2-(trifluoromethyl)-1,2-dihydropyridine-3-carboxylate (4a)</b> | <b>S2</b>      |
| <b>3: Copies of product of 4a spectral data</b>                                                                                                             | <b>S3-S5</b>   |
| <b>4: General procedure for the preparation of 2-hydroxybenzoyl pyridine-3-carboxylates 4b-k.</b>                                                           | <b>S6</b>      |
| <b>5: Copies of products of 4b-k spectral data</b>                                                                                                          | <b>S6-S22</b>  |
| <b>6: General procedure for the preparation of 2-hydroxybenzoyl-pyridone-3-carboxylates 5a-e</b>                                                            | <b>S23</b>     |
| <b>7: Copies of products of 5a-e spectral data</b>                                                                                                          | <b>S23-S30</b> |
| <b>8: <sup>1</sup>H NMR-Monitoring reactions between 3-formylchromone, aniline/benzylamine and 4,4,4-trifluoro-3-oxobutanoate.</b>                          | <b>S31-S34</b> |
| <b>9: General procedure for the preparation of 2-hydroxy-benzoylbenzopyrido-1,3-oxazole-4-carboxylates 7a-f.</b>                                            | <b>S35</b>     |
| <b>10: Copies of products of 7a-f spectral data</b>                                                                                                         | <b>S35-S44</b> |

## Experimental section

### General

Ethyl 4,4,4-trifluoro-3-oxobutanoate, ethyl 4,4,4-trichloro-3-oxobutanoate, 1,1,1-trifluoropentane-2,4-dione, 4,4,4-trifluoro-1-phenylbutane-1,3-dione, 4,4,4-trifluoro-1-(furan-2-yl)butane-1,3-dione, and tryptamine were procured from Sigma-Aldrich. Benzylamine, aniline, 2-aminophenol, benzene-1,2-diamine, 2-aminobenzenethiol and solvents were obtained from local suppliers. 3-Formylchromenes were prepared as per the literature procedure. <sup>1</sup>H NMR and <sup>13</sup>C NMR spectra were recorded on a Varian Gemini 200 MHz and Avance 300 MHz spectrometer in CDCl<sub>3</sub> using TMS as internal standard. IR spectra were recorded on a Nicollet 740 FTIR spectrometer. Mass spectra were obtained on Agilent LCMS instrument. HRMS were measured on Agilent Technologies 6510, Q-TOFLC/MS ESI-Technique. Melting points were determined in open glass capillary tubes on a Metler FP 51 melting point apparatus and are uncorrected. All reactions were monitored by thin layer chromatography (TLC) on pre-coated silica gel 60 F<sub>254</sub> (mesh); spots were visualized under UV light. Merck silica gel (100-200 mesh) was used for chromatography.

### General procedure for the preparation of ethyl 2-hydroxy-5-(2-hydroxybenzoyl)-1-phenyl-2-(trifluoromethyl)-1,2-dihydropyridine-3-carboxylate (**4a**)

Ethyl 4,4,4-trifluoro-3-oxobutanoate (**3a**, 1.5 mmol) was added to a stirred solution of 4-oxo-4*H*-chromene-3-carbaldehyde (**1a**, 1 mmol) and aniline (**2a**, 1.2 mmol) in CH<sub>3</sub>CN (2 mL). The contents were stirred under reflux conditions for 2 h. After completion of the reaction (TLC), the residue was purified by column chromatography by using silica gel (100:200, ethyl acetate/hexane 2:98) afforded ethyl 2-hydroxy-5-(2-hydroxybenzoyl)-1-phenyl-2-(trifluoromethyl)-1,2-dihydropyridine-3-carboxylate **4a** as yellow solid.

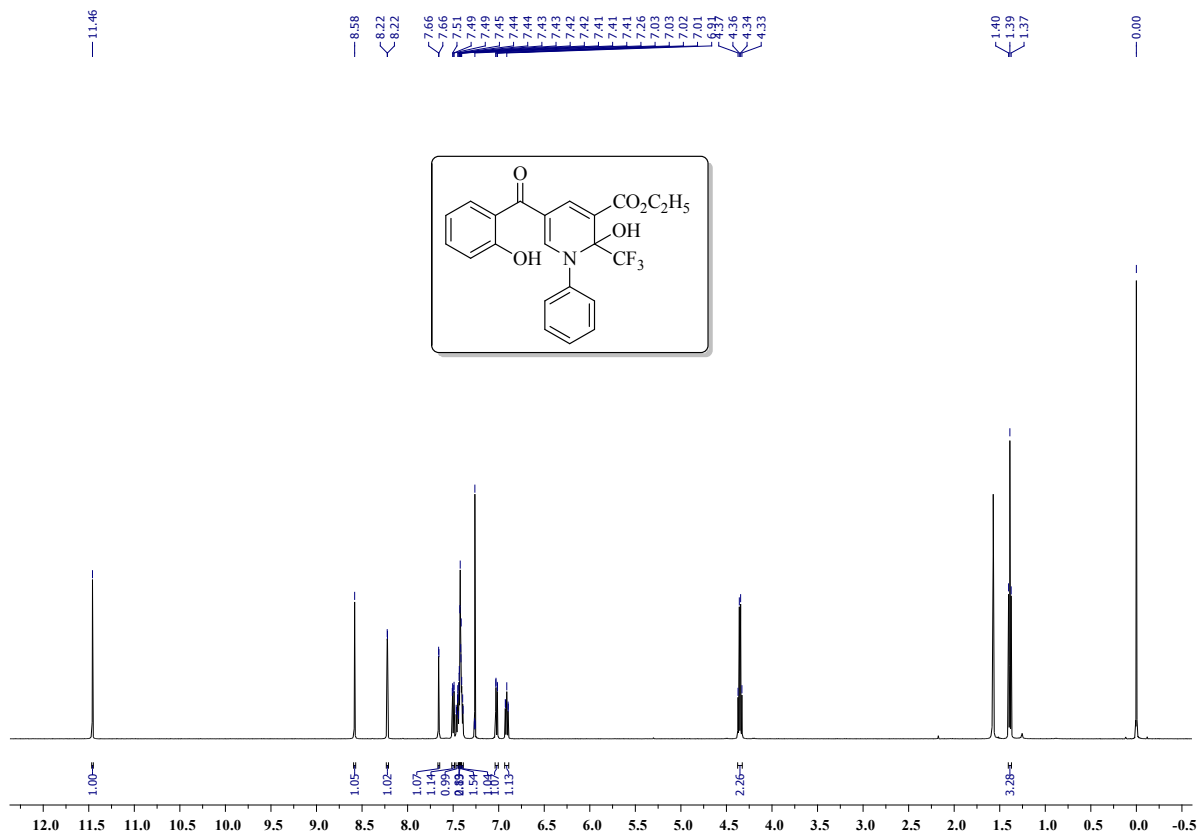

<sup>1</sup>H NMR spectrum of compound 4a

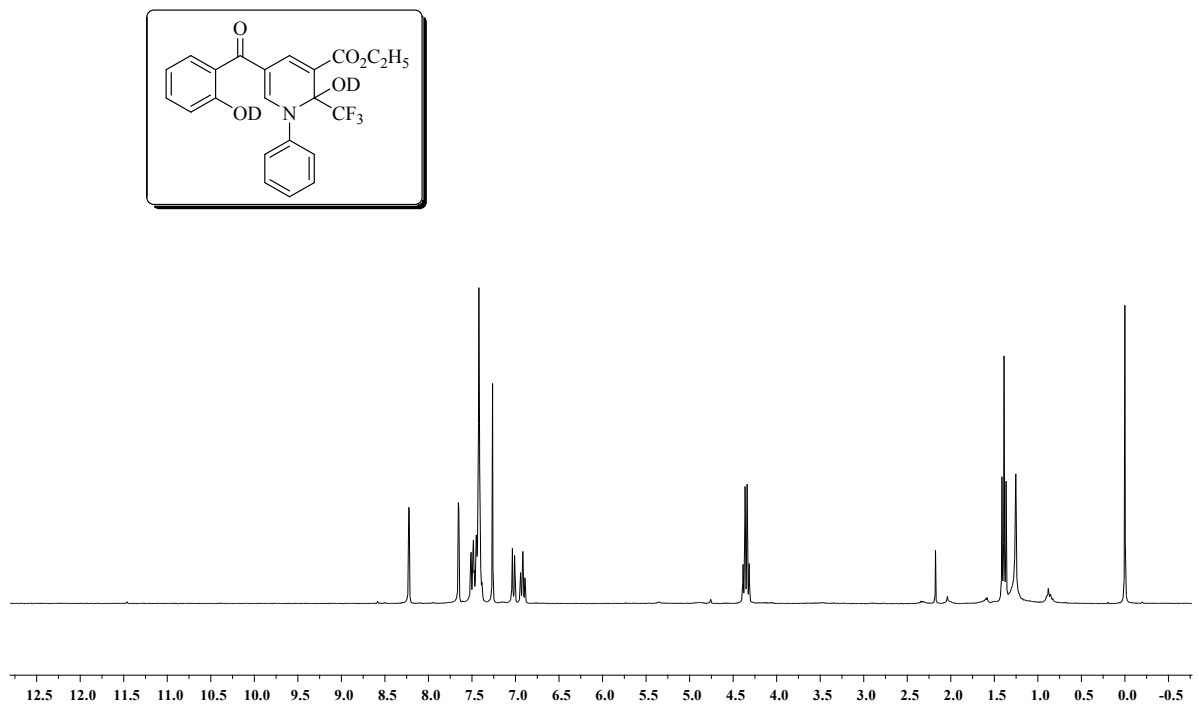

<sup>1</sup>H NMR Spectrum of compound 4a D<sub>2</sub>O exchange

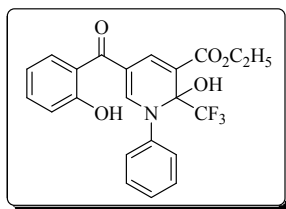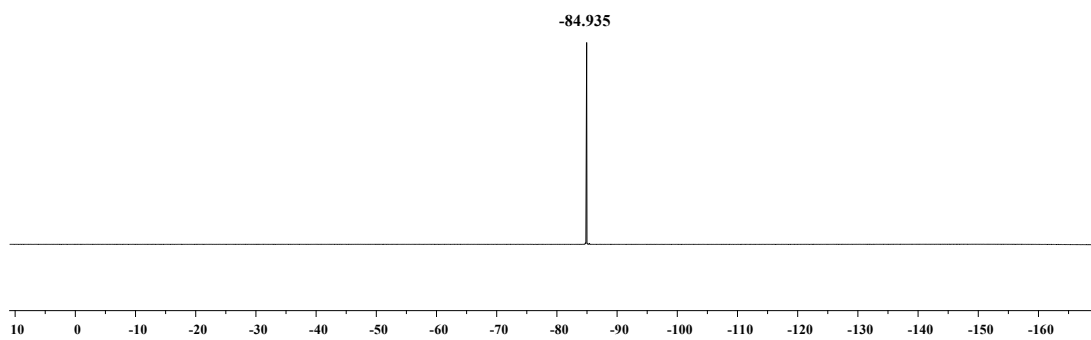

<sup>19</sup>F NMR Spectrum of compound 4a

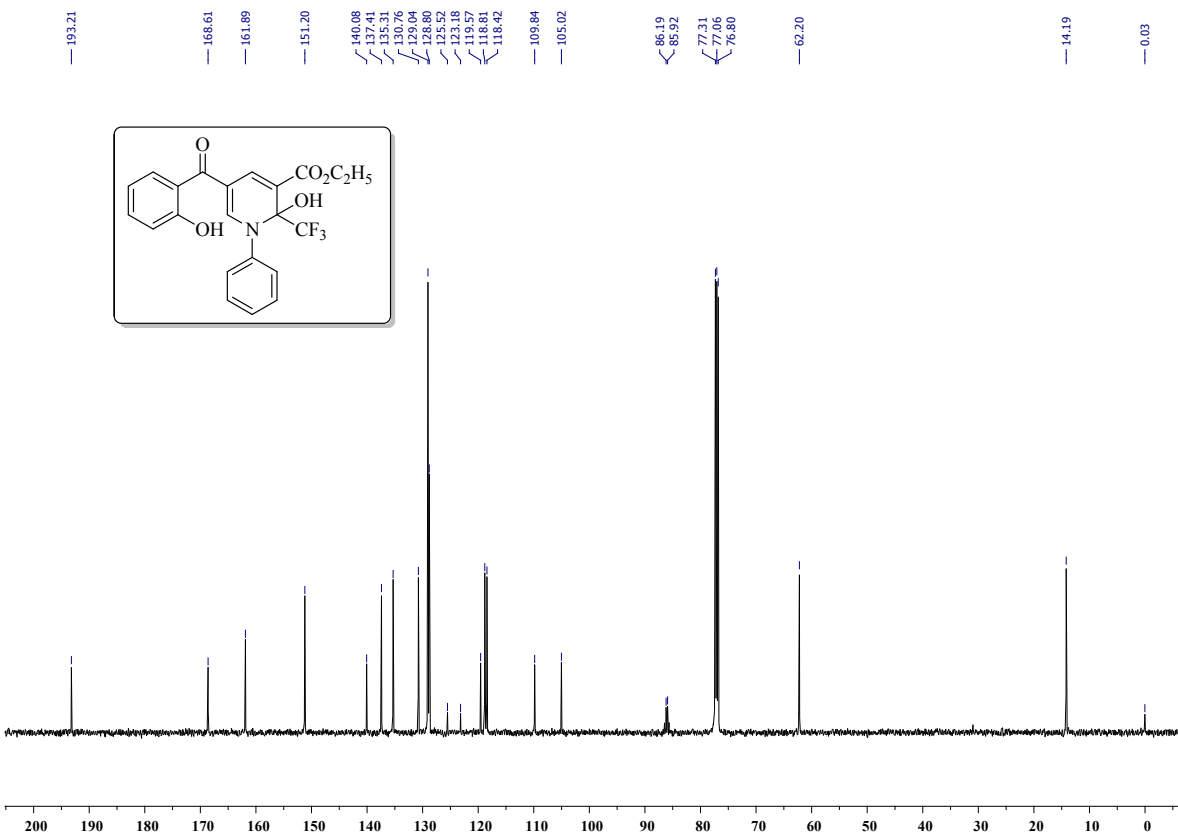

<sup>13</sup>C NMR spectrum of compound 4a

File Name C:\IICT-HRMS\11.02.2014\BCR-FAC-3  
Sample Name K RAJ  
Sample ID A:1  
Date and Time 13-02-14 14:19:45

BCR-FAC-3 #5-87 RT: 0.02-0.30 AV: 83 SB: 327 0.80-1.90 NL: 2.54E7  
T: FTMS {1,1} + p ESI Full ms [100.00-2000.00]

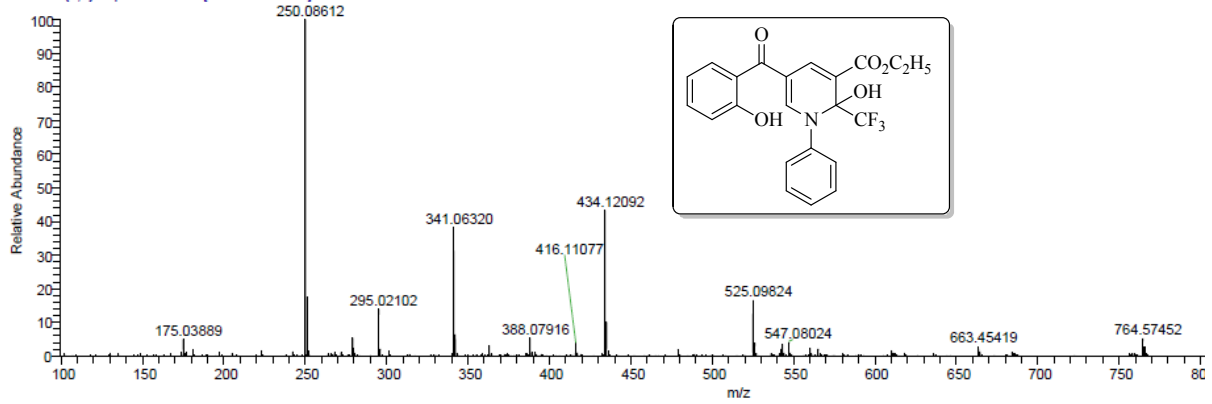

BCR-FAC-3#8-30 RT: 0.03-0.11 AV: 23  
T: FTMS {1,1} + p ESI Full ms [100.00-2000.00]  
m/z = 410.01-448.82

| m/z       | Intensity  | Relative | Theo. Mass | Delta (ppm) | RDB equiv. | Composition                                                    |
|-----------|------------|----------|------------|-------------|------------|----------------------------------------------------------------|
| 434.12098 | 15865634.0 | 100.00   | 434.12098  | -0.01       | 12.5       | C <sub>22</sub> H <sub>19</sub> O <sub>5</sub> NF <sub>3</sub> |

HRMS spectrum of compound 4a

## General procedure for the preparation of 2-hydroxybenzoyl-2-(trifluoromethyl)-1,2-dihydropyridine-3-carboxylates **4b-k**.

Ethyl 4,4,4-trifluoro-3-oxobutanoate (**3a**, 1.5 mmol) was added to a stirred solution of 4-oxo-4*H*-chromene-3-carbaldehyde (**1a**, 1 mmol) and phenylmethanamine (**2b**, 1.2 mmol) in CH<sub>3</sub>CN (2 mL). The contents were stirred under reflux conditions for 2 h. After completion of the reaction (TLC), the residue was purified by column chromatography by using silica gel (100:200, ethyl acetate/hexane 2:98) afforded ethyl 1-benzyl-2-hydroxy-5-(2-hydroxybenzoyl)-2-(trifluoromethyl)-1,2-dihydropyridine-3-carboxylate **4b**. Similarly, compounds **4c-h** was prepared from corresponding 3-formylchromones **1a-c**, and benzylamines **2b-d**. However, compounds **4i-k** were prepared from corresponding 3-formylchromone **1a**, benzylamine **2b** and trifluoro containing 1,3-diketones such as 1,1,1-trifluoropentane-2,4-dione **3e**, 4,4,4-trifluoro-1-phenylbutane-1,3-dione **3f**, and 4,4,4-trifluoro-1-(furan-2-yl)butane-1,3-dione **3g**.

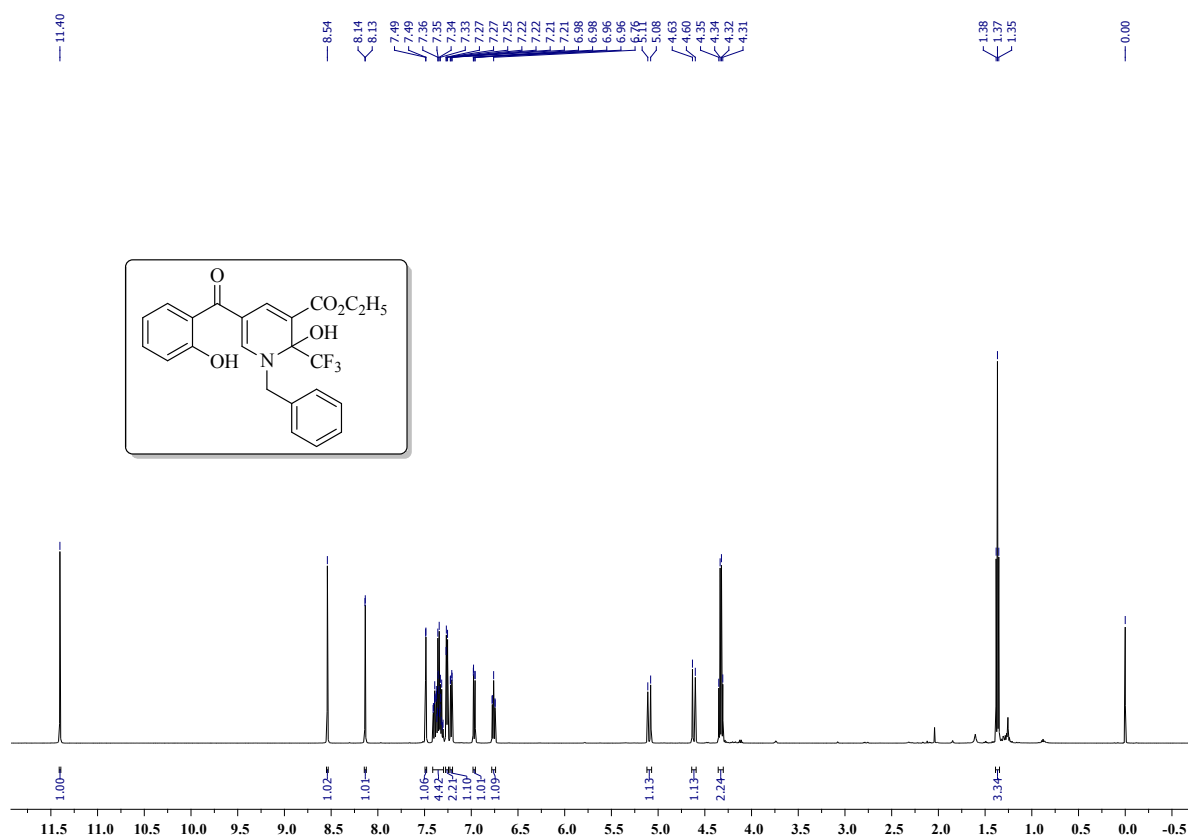

<sup>1</sup>H NMR spectrum of compound **4b**

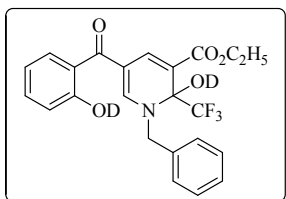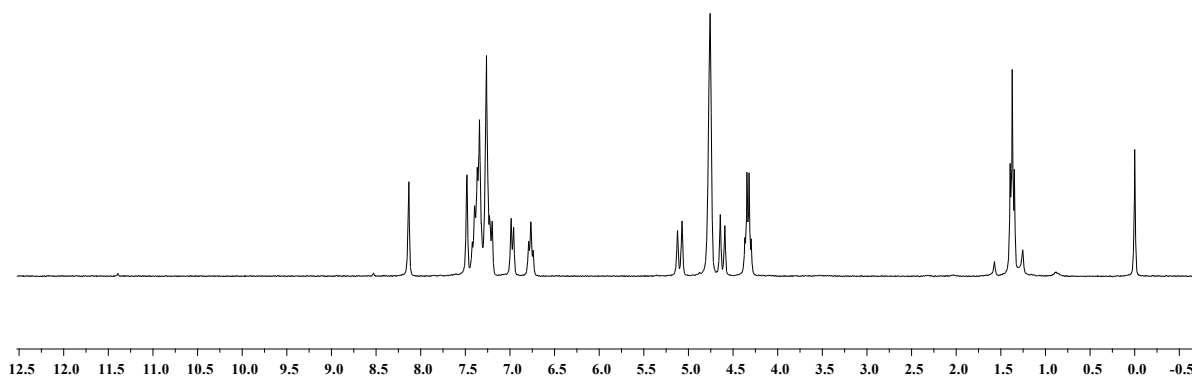

$^1\text{H}$  NMR Spectrum of compound **4b**  $\text{D}_2\text{O}$  exchange

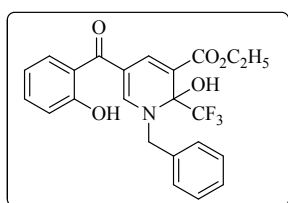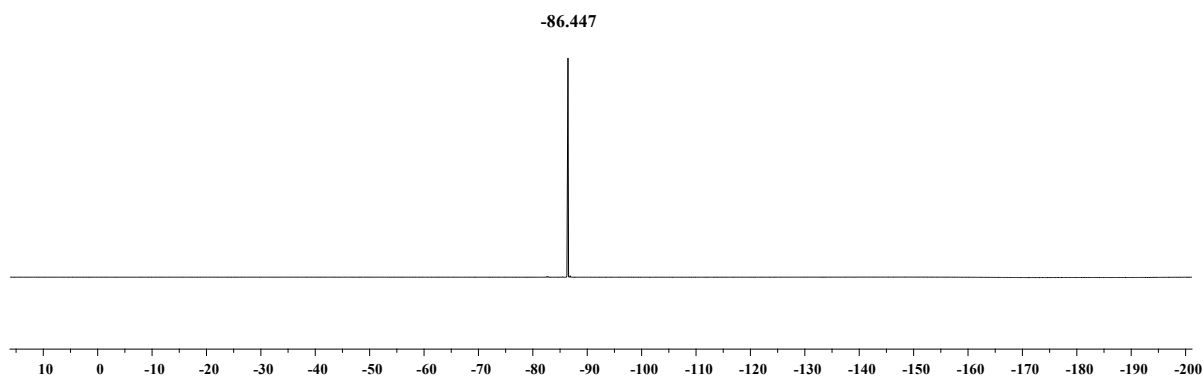

$^{19}\text{F}$  NMR Spectrum of compound **4b**

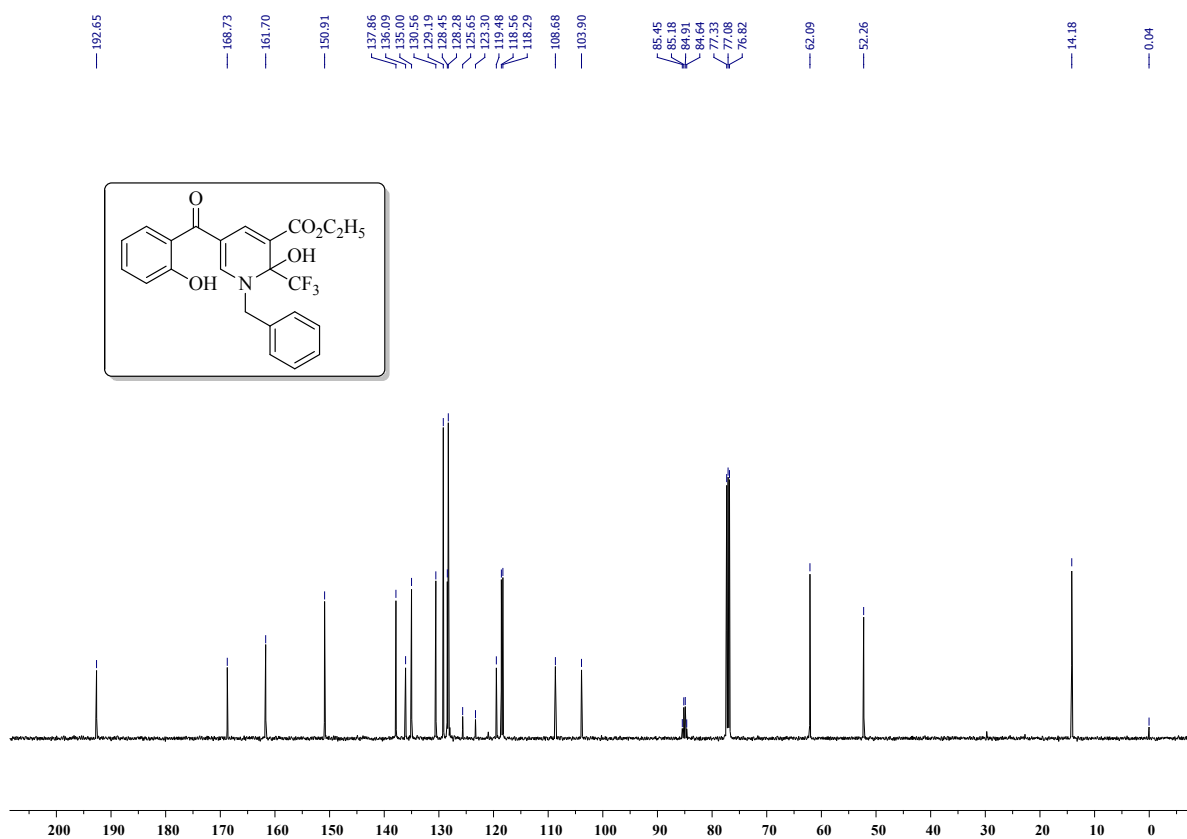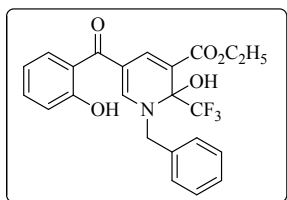

<sup>13</sup>C NMR spectrum of compound **4b**

National Centre for Mass Spectrometry

BCR-FBAC-3#6-88 RT: 0.02-0.30 AV: 83 SB: 327 0.80-1.90 NL: 1.08E8  
T: FTMS (1,1) + p ESI Full ms [100.00-2000.00]

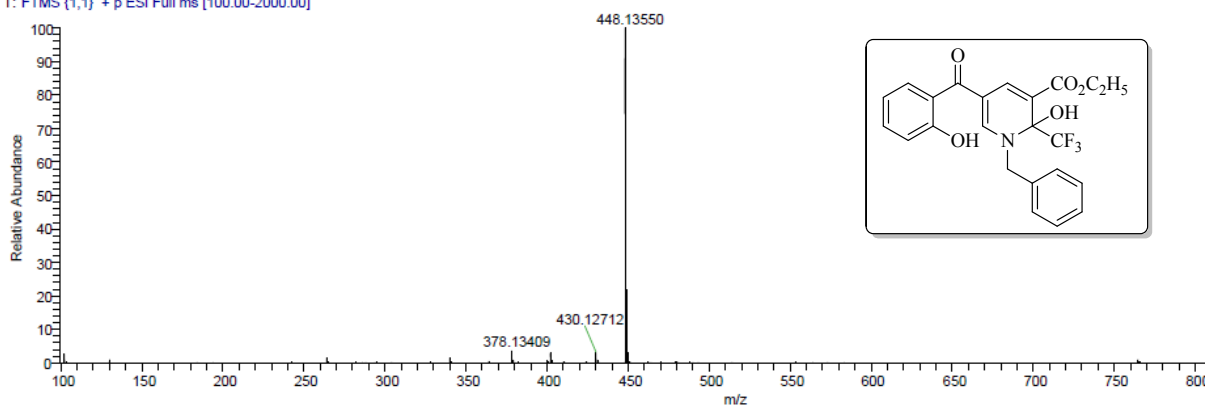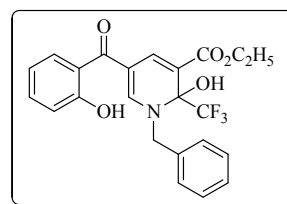

BCR-FBAC-3#8-30 RT: 0.03-0.10 AV: 23

T: FTMS (1,1) + p ESI Full ms [100.00-2000.00]

| m/z       | Intensity  | Relative | Theo. Mass | Delta (ppm) | RDB equiv. | Composition                                                    |
|-----------|------------|----------|------------|-------------|------------|----------------------------------------------------------------|
| 448.13554 | 93684040.0 | 100.00   | 448.13663  | -2.44       | 12.5       | C <sub>23</sub> H <sub>21</sub> O <sub>5</sub> NF <sub>3</sub> |

HRMS spectrum of compound **4b**



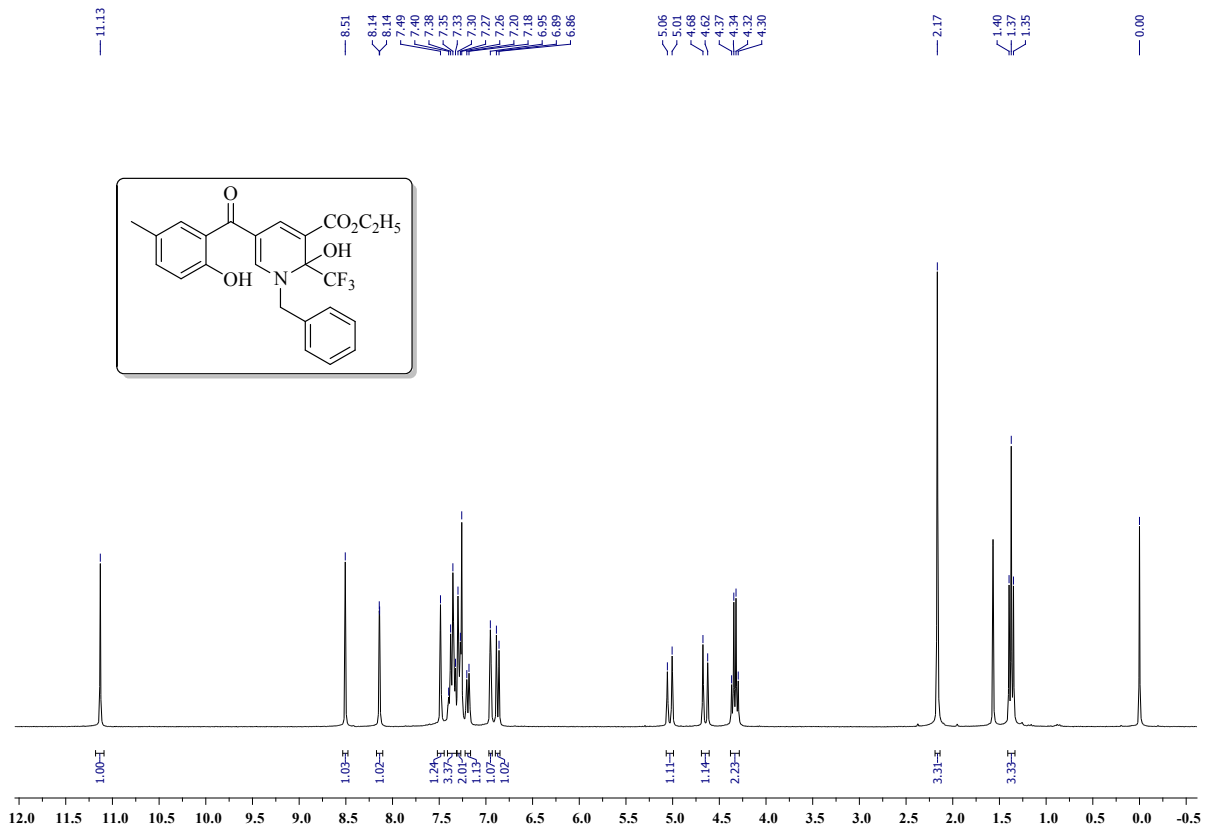

<sup>1</sup>H NMR spectrum of compound 4c

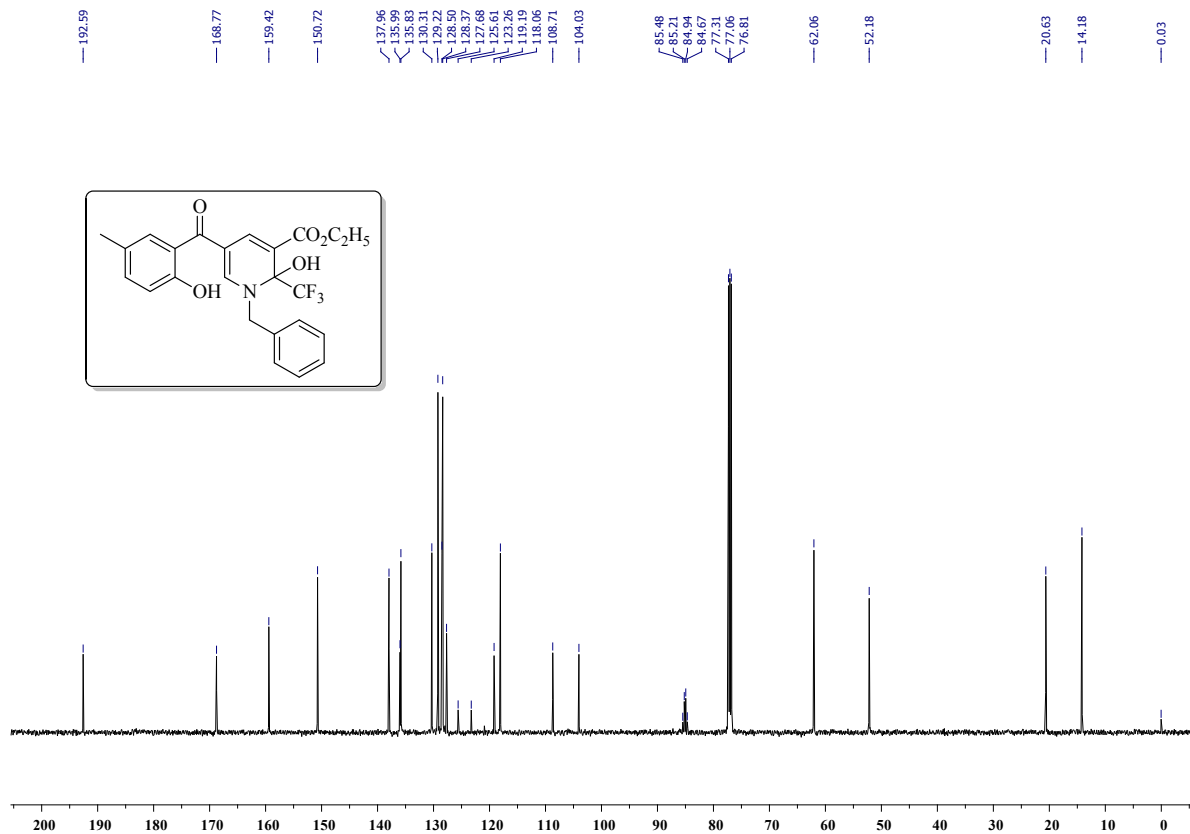

<sup>13</sup>C NMR spectrum of compound 4c

File Name C:\ICT-HRMS\30.09.2014\BCR-MEFBA-CF3E

Sample Name

Sample ID K-RAJKUMAR

Date and Time 30-09-14 16:25:42

BCR-MEFBA-CF3E#2-38 RT: 0.02-0.30 AV: 37 SB: 103 0.80-1.90 NL: 8.36E6

T: FTMS {1,1} + p ESI Full ms [110.00-2000.00]

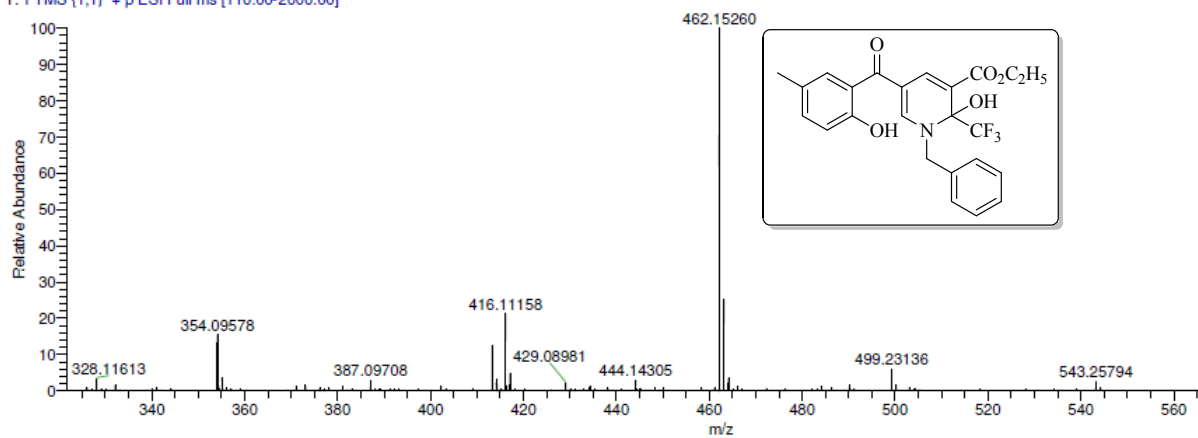

BCR-MEFBA-CF3E#8-30 RT: 0.06-0.23 AV: 23

T: FTMS {1,1} + p ESI Full ms [110.00-2000.00]

m/z= 456.45-470.92

| m/z       | Intensity  | Relative | Theo. Mass | Delta (ppm) | RDB equiv. | Composition                                                    |
|-----------|------------|----------|------------|-------------|------------|----------------------------------------------------------------|
| 462.15255 | 11256268.0 | 100.00   | 462.15228  | 0.27        | 12.5       | C <sub>24</sub> H <sub>23</sub> O <sub>5</sub> NF <sub>3</sub> |

HRMS spectrum of compound 4c

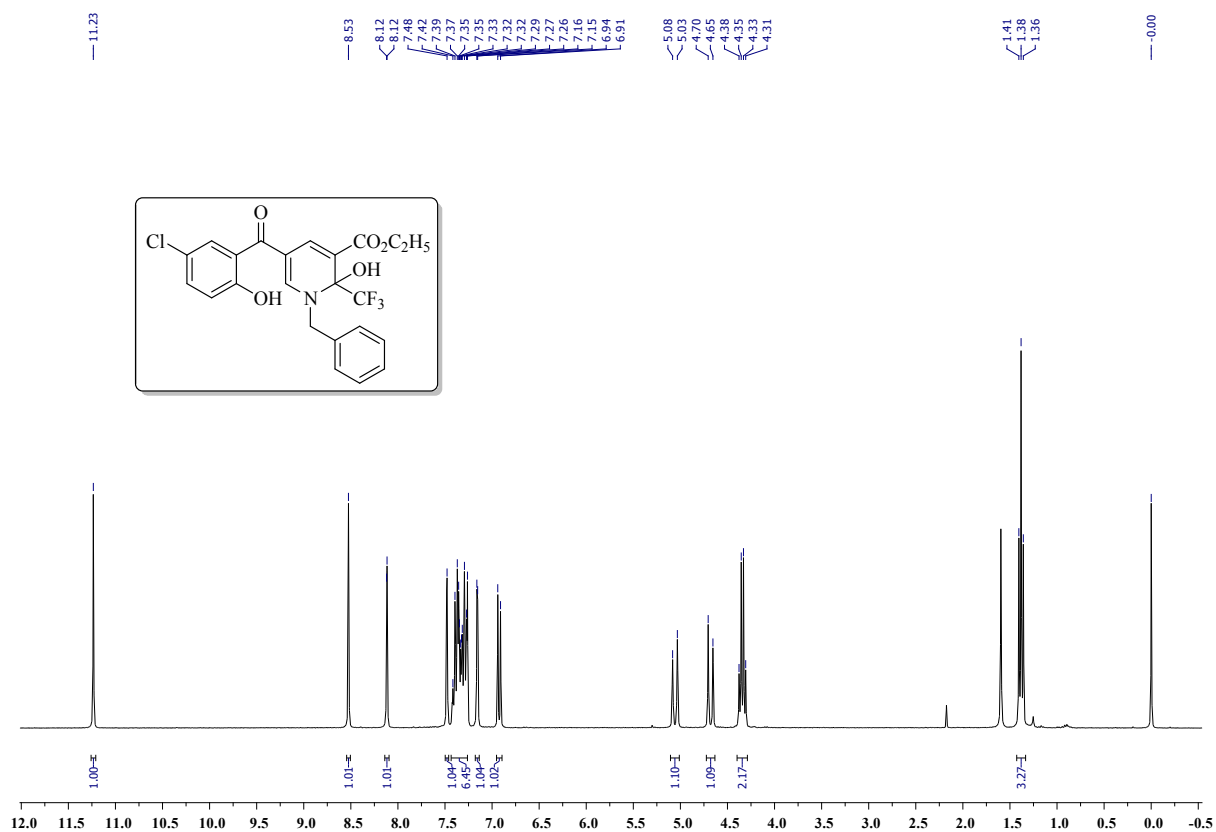

<sup>1</sup>H NMR spectrum of compound 4d

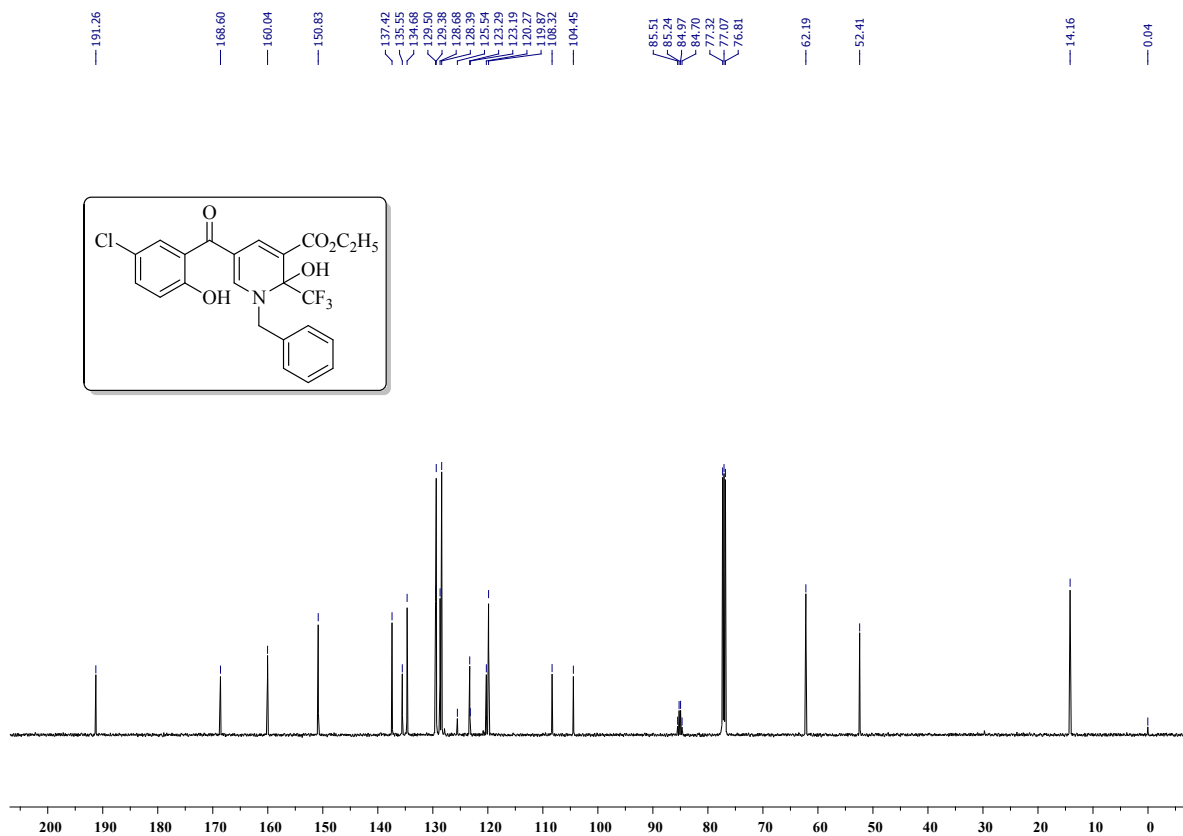

<sup>13</sup>C NMR spectrum of compound **4d**

National Centre for Mass Spectrometry  
CSIR-Indian Institute of Chemical Technology

File Name C:\MCT-HRMS\...BCR-CLFBA-CF3-EAA  
Sample Name  
Sample ID K-RAJKUMAR  
Date and Time 30-09-14 16:23:09

BCR-CLFBA-CF3-EAA#2-39 RT: 0.02-0.30 AV: 38 SB: 107 0.80-1.90 NL: 7.38E6  
T: FTMS {1,1} + p ESI Full ms [110.00-2000.00]

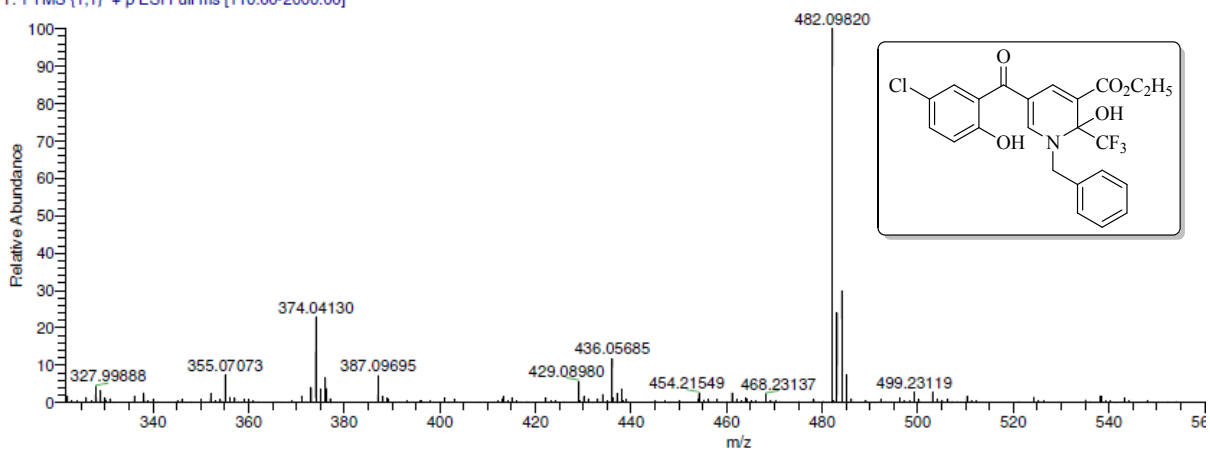

BCR-CLFBA-CF3-EAA#8-30 RT: 0.07-0.23 AV: 23  
T: FTMS {1,1} + p ESI Full ms [110.00-2000.00]  
m/z = 472.23-489.52

| m/z       | Intensity | Relative | Theo. Mass | Delta (ppm) | RDB equiv. | Composition                                                      |
|-----------|-----------|----------|------------|-------------|------------|------------------------------------------------------------------|
| 482.09815 | 9635423.0 | 100.00   | 482.09766  | 0.49        | 12.5       | C <sub>23</sub> H <sub>20</sub> O <sub>5</sub> NClF <sub>3</sub> |

HRMS spectrum of compound **4d**

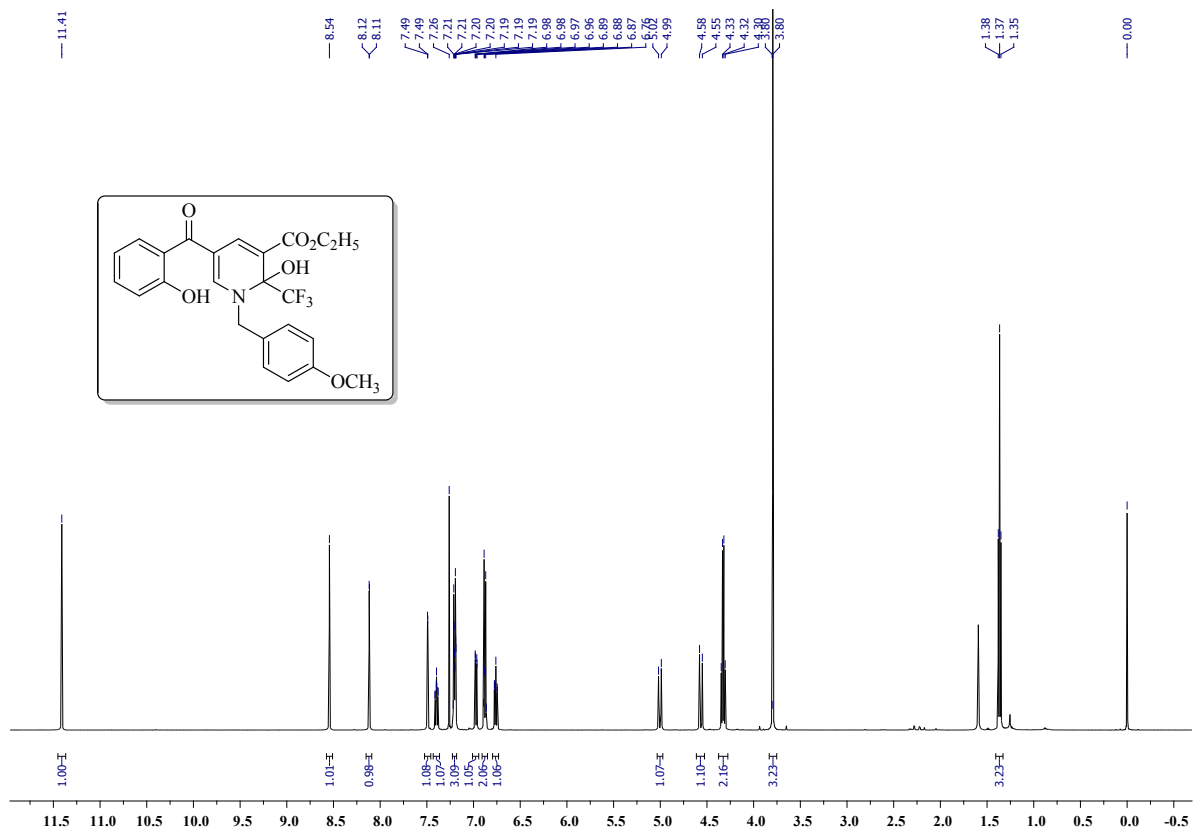

<sup>1</sup>H NMR spectrum of compound 4e

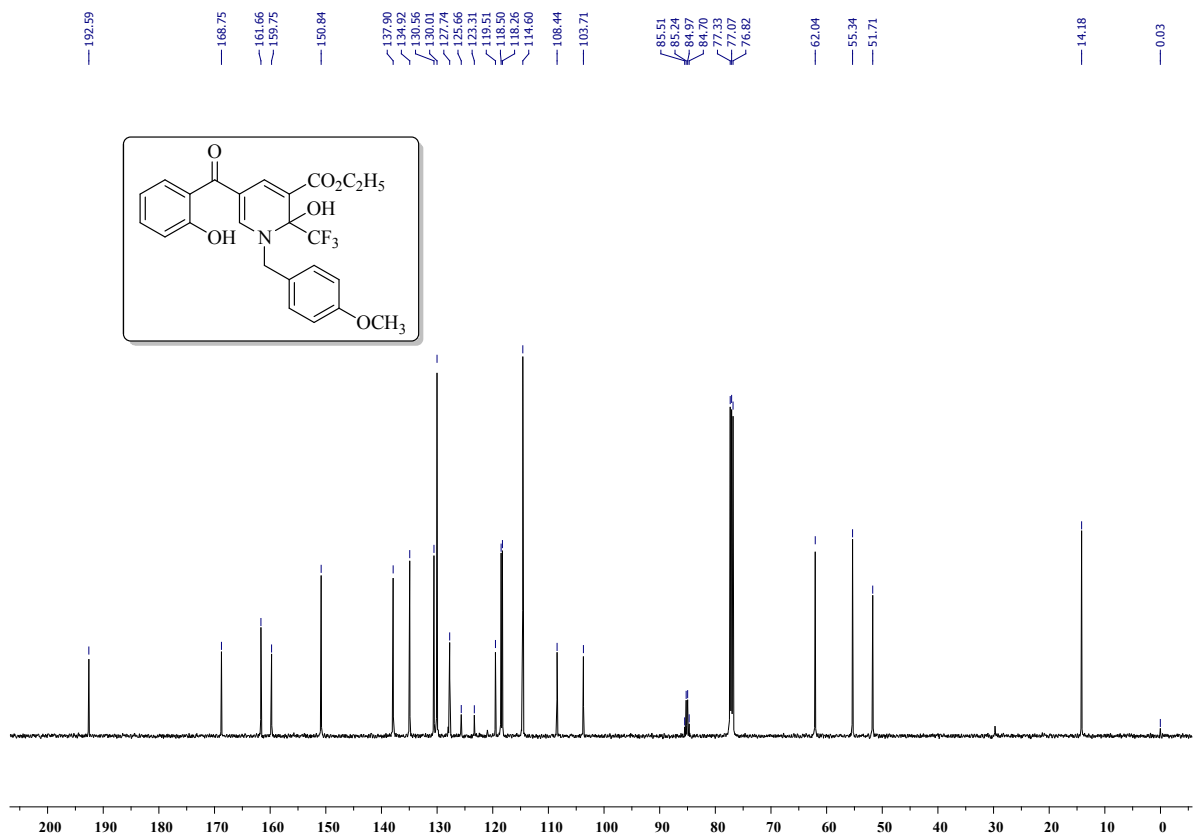

<sup>13</sup>C NMR spectrum of compound 4e

File Name C:\IICT-HRMS\...\BCR-FA-OMEBA-CF3E  
Sample Name  
Sample ID K-RAJKUMAR  
Date and Time 30-09-14 16:28:17

BCR-FA-OMEBA-CF3E #2-38 RT: 0.02-0.30 AV: 37 SB: 104 0.80-1.90 NL: 6.57E6  
T: FTMS (1,1) + p ESI Full ms [110.00-2000.00]

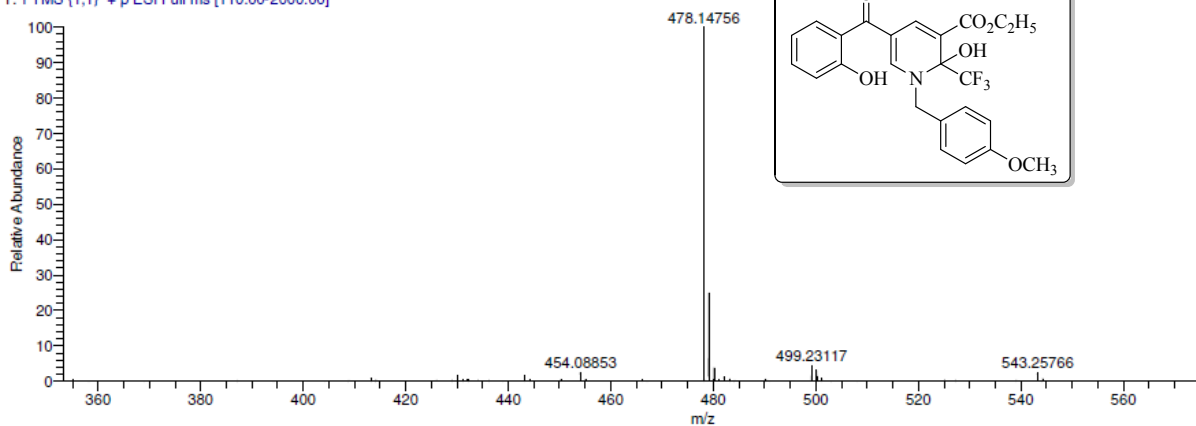

BCR-FA-OMEBA-CF3E#8-30 RT: 0.07-0.23 AV: 23  
T: FTMS (1,1) + p ESI Full ms [110.00-2000.00]  
m/z= 470.90-486.70

| m/z       | Intensity | Relative | Theo. Mass | Delta (ppm) | RDB equiv. | Composition                                                    |
|-----------|-----------|----------|------------|-------------|------------|----------------------------------------------------------------|
| 478.14744 | 8517776.0 | 100.00   | 478.14720  | 0.25        | 12.5       | C <sub>24</sub> H <sub>23</sub> O <sub>6</sub> NF <sub>3</sub> |

HRMS spectrum of compound 4e

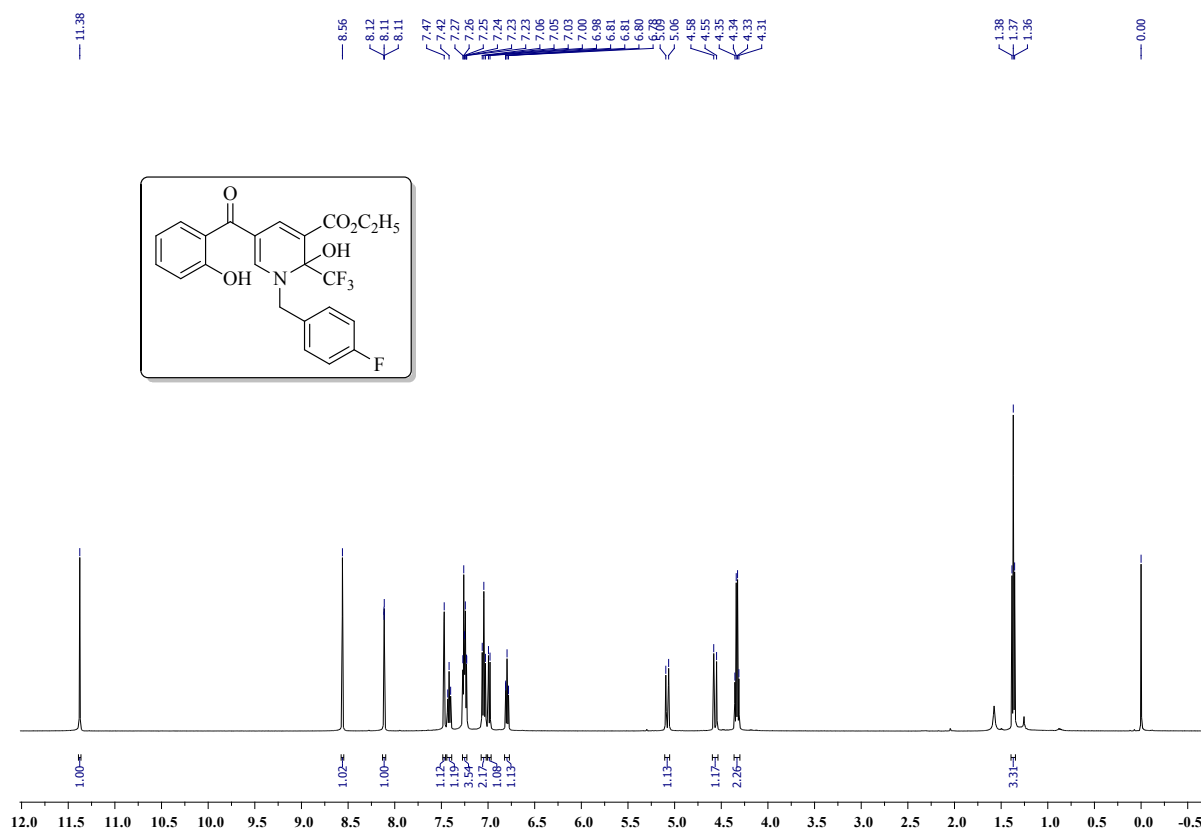

<sup>1</sup>H NMR spectrum of compound 4f

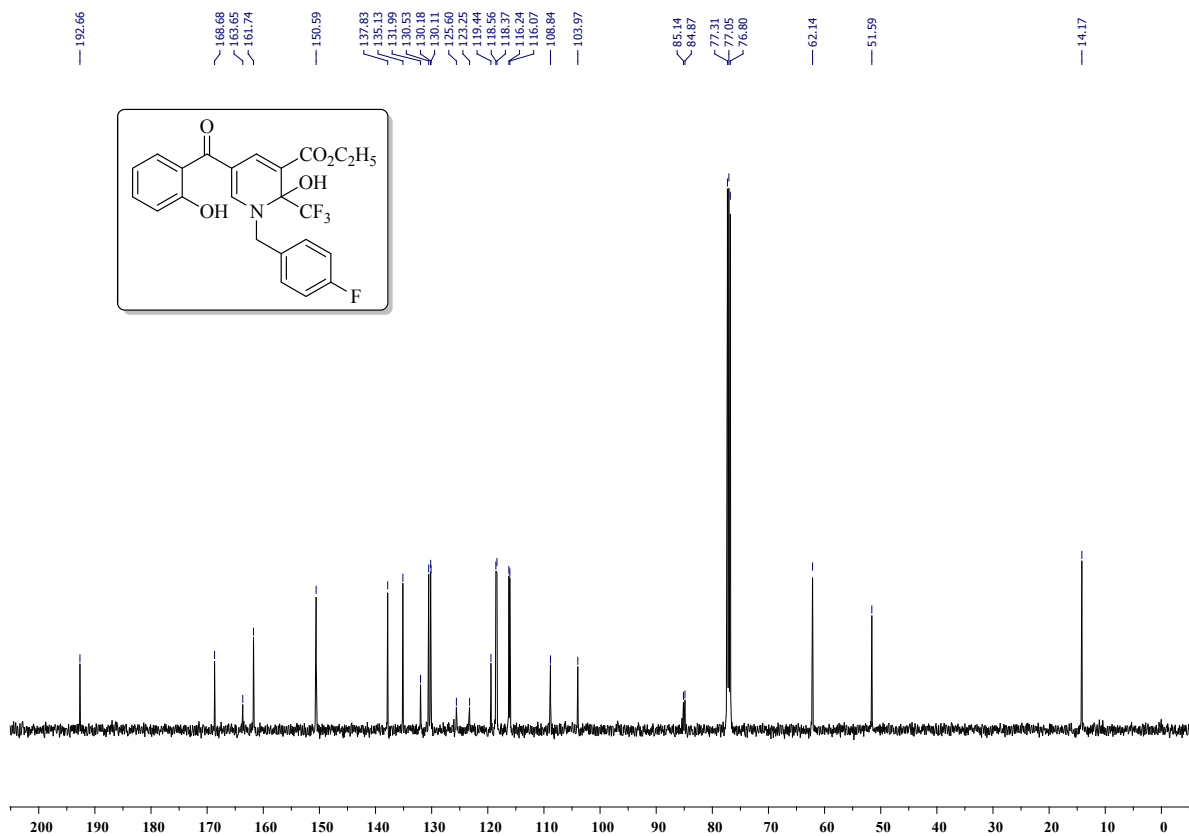

<sup>13</sup>C NMR spectrum of compound 4f

National Centre for Mass Spectrometry  
 CSIR-Indian Institute of Chemical Technology

File Name C:\NICT-HRMS\20.08.2014\BCR-FA-FBA-CF3E  
 Sample Name  
 Sample ID SAIRAM  
 Date and Time 20-08-14 14:36:37

BCR-FA-FBA-CF3E #4-85 RT: 0.02-0.30 AV: 82 SB: 326 0.80-1.90 NL: 1.58E7  
 T: FTMS (1,1) + p ESI Full ms [100.00-2000.00]

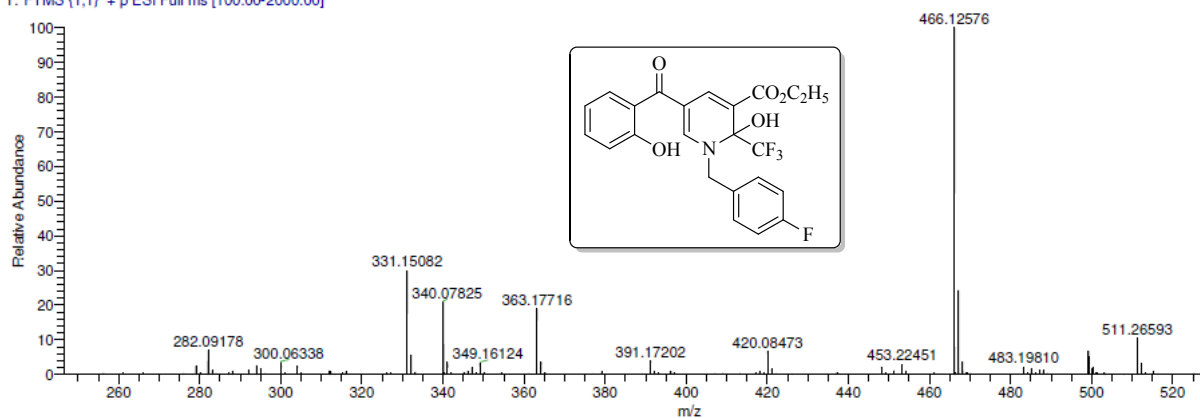

BCR-FA-FBA-CF3E#8-30 RT: 0.04-0.11 AV: 23  
 T: FTMS (1,1) + p ESI Full ms [100.00-2000.00]  
 m/z= 463.27-471.43

| m/z       | Intensity  | Relative | Theo. Mass | Delta (ppm) | RDB equiv. | Composition                                                     |
|-----------|------------|----------|------------|-------------|------------|-----------------------------------------------------------------|
| 466.12611 | 12564255.0 | 100.00   | 466.12721  | -2.36       | 12.5       | C <sub>23</sub> H <sub>20</sub> O <sub>5</sub> N F <sub>4</sub> |

HRMS spectrum of compound 4f

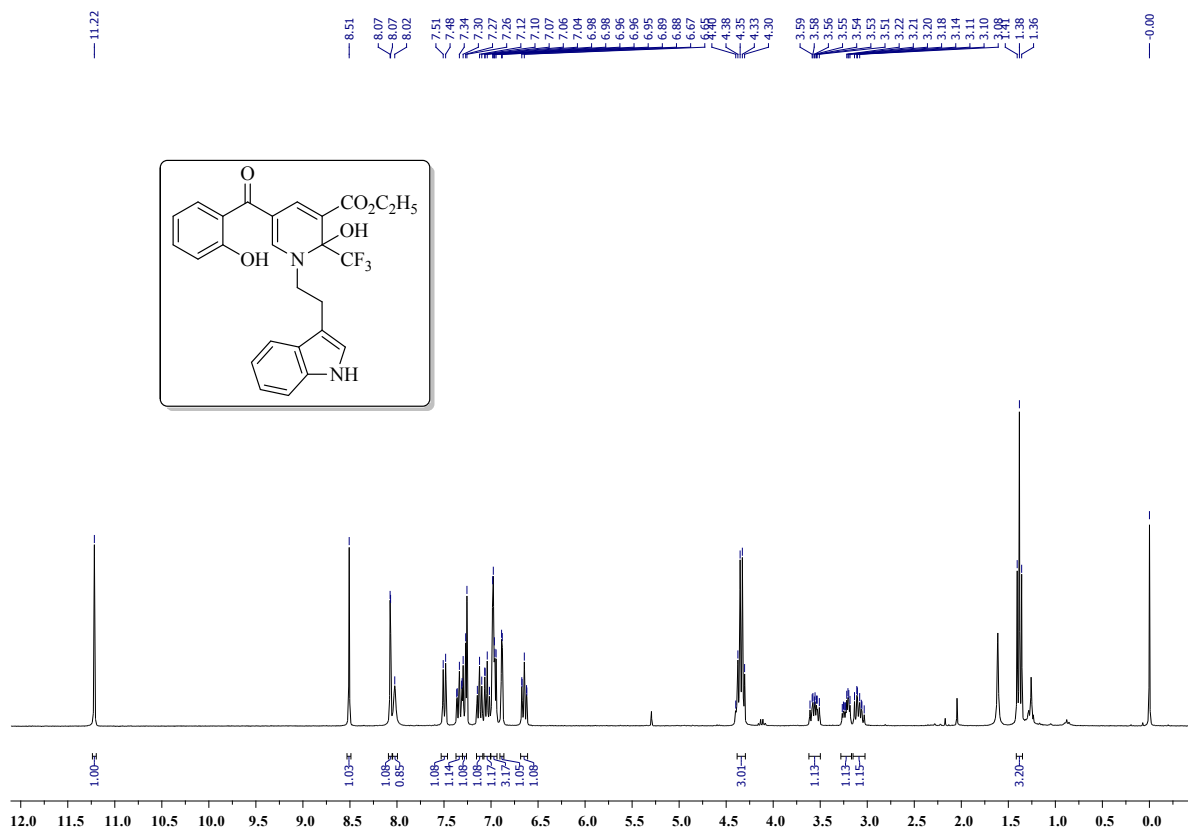

<sup>1</sup>H NMR spectrum of compound 4g

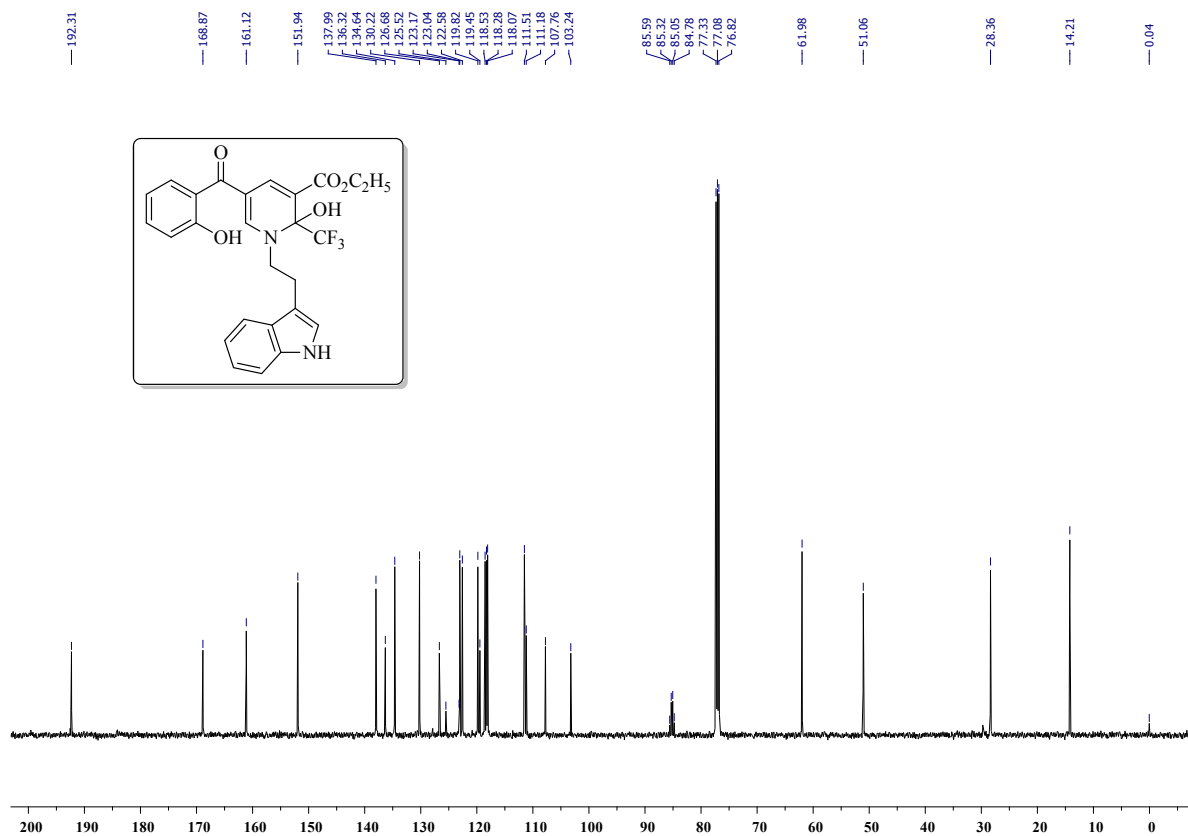

<sup>13</sup>C NMR spectrum of compound 4g

File Name C:\ICT-HRMS\11.02.2014\BCR-FTRT-CF3  
Sample Name K RAJ  
Sample ID A:1  
Date and Time 13-02-14 14:22:28

BCR-FTRT-CF3 #4-87 RT: 0.02-0.30 AV: 84 SB: 327 0.80-1.90 NL: 4.69E7  
T: FTMS {1,1} + p ESI Full ms [100.00-2000.00]

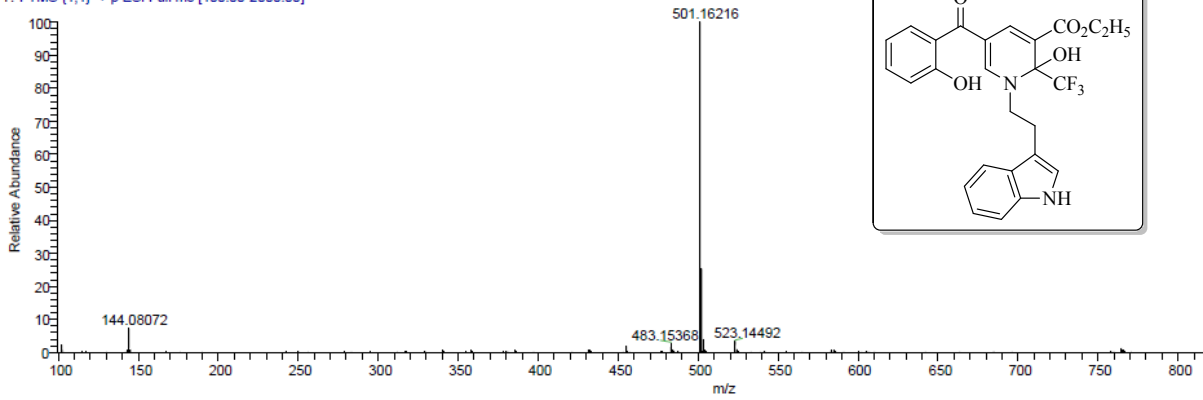

BCR-FTRT-CF3#8-30 RT: 0.03-0.11 AV: 23  
T: FTMS {1,1} + p ESI Full ms [100.00-2000.00]  
m/z = 460.30-535.18

| m/z       | Intensity  | Relative | Theo. Mass | Delta (ppm) | RDB equiv. | Composition                                                                  |
|-----------|------------|----------|------------|-------------|------------|------------------------------------------------------------------------------|
| 501.16216 | 59884396.0 | 100.00   | 501.16318  | -2.04       | 14.5       | C <sub>26</sub> H <sub>24</sub> O <sub>5</sub> N <sub>2</sub> F <sub>3</sub> |

HRMS spectrum of compound 4g

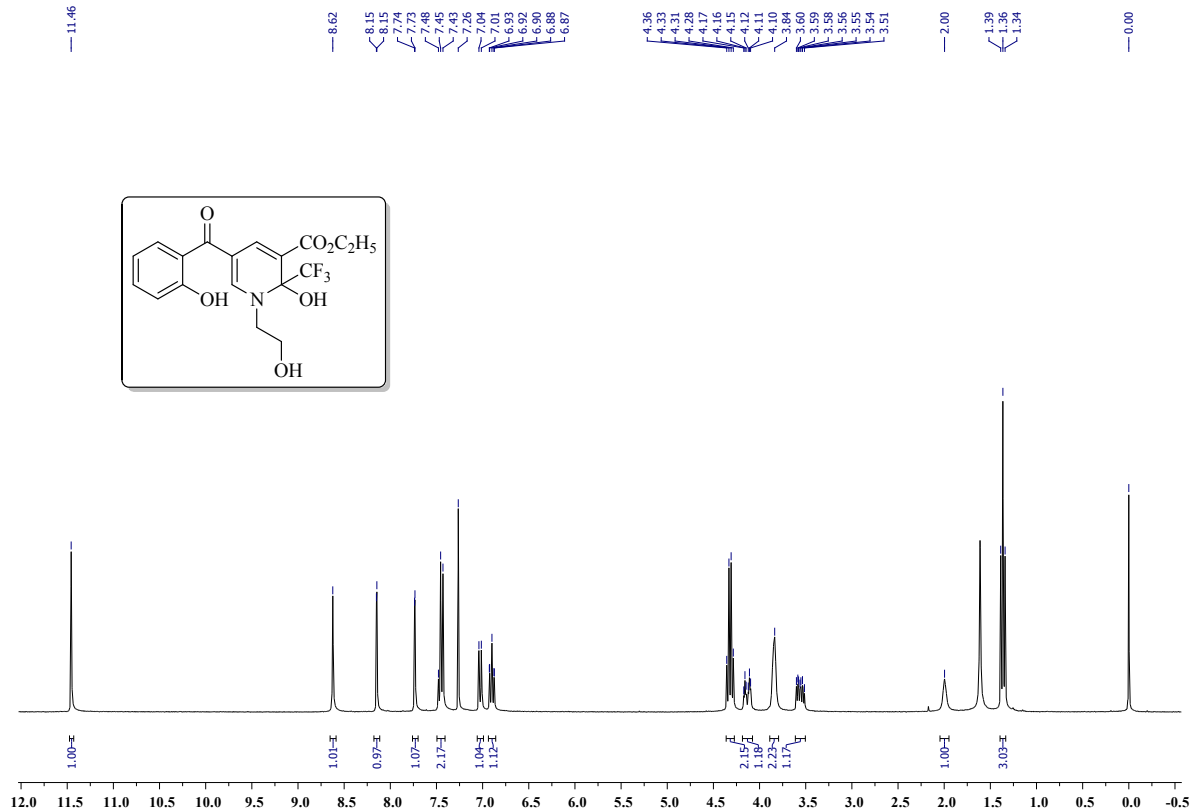

<sup>1</sup>H NMR spectrum of compound 4h



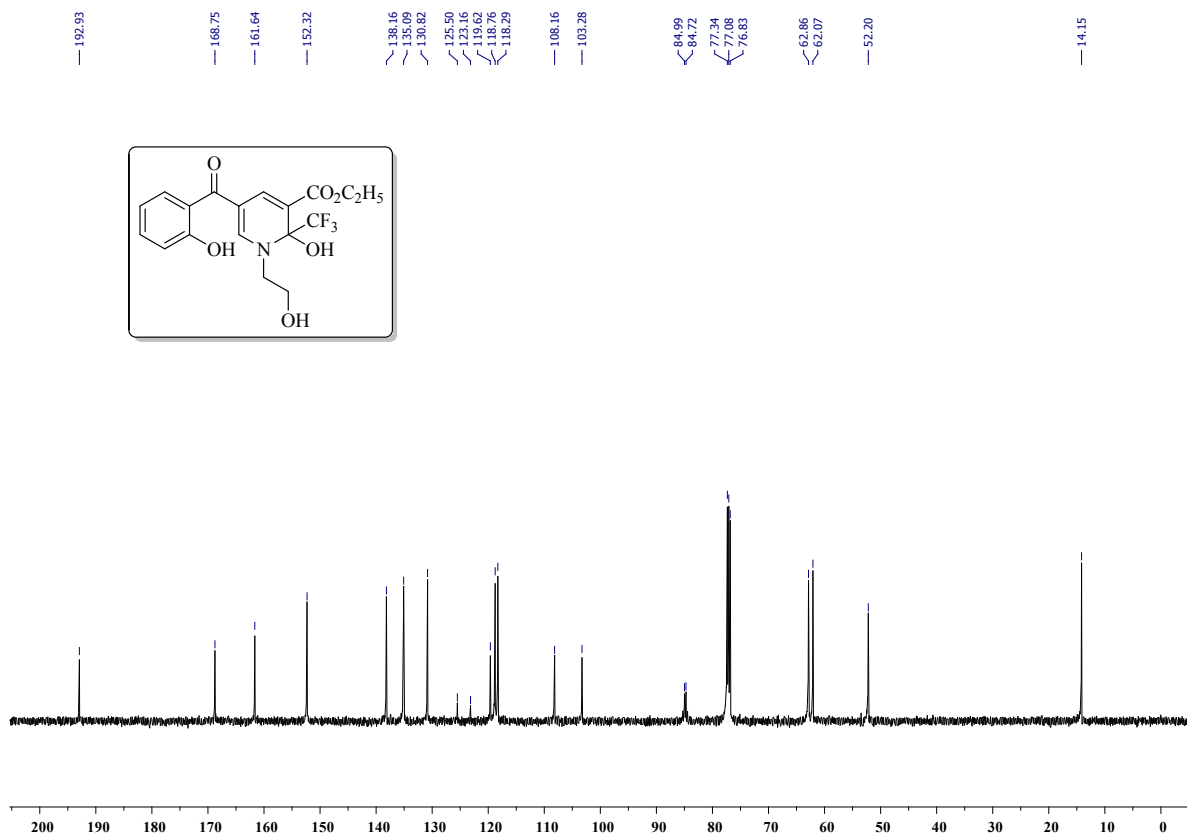

<sup>13</sup>C NMR spectrum of compound 4h

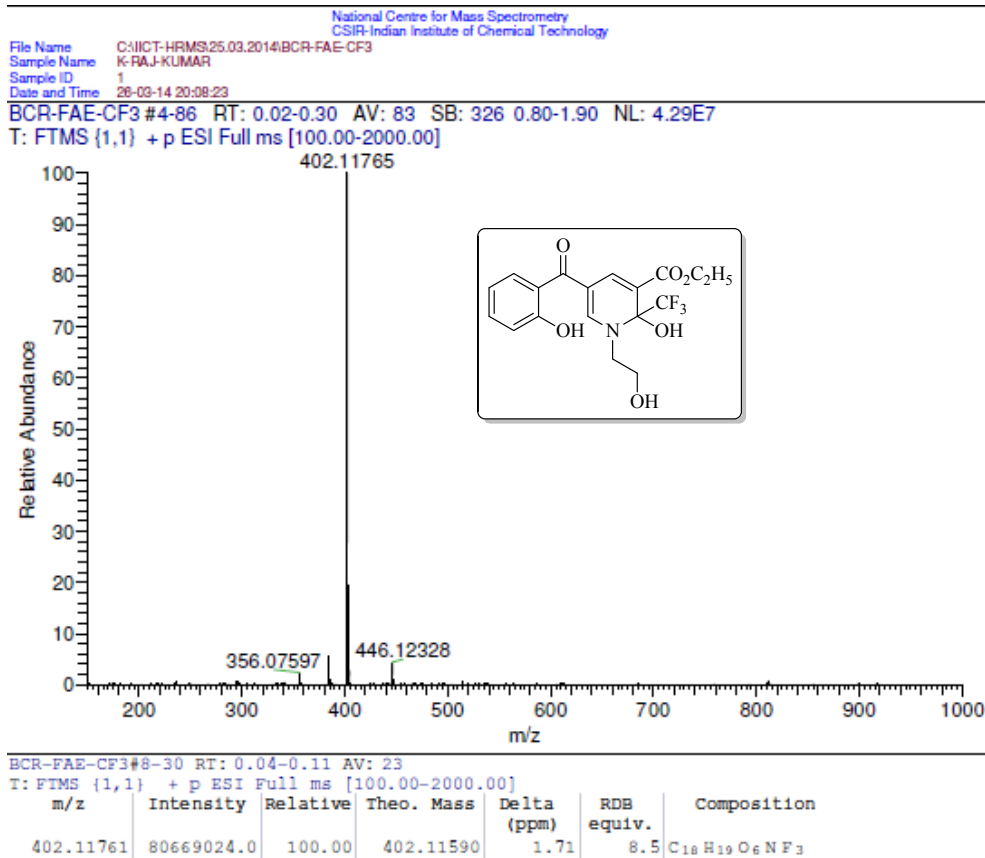

HRMS spectrum of compound 4h

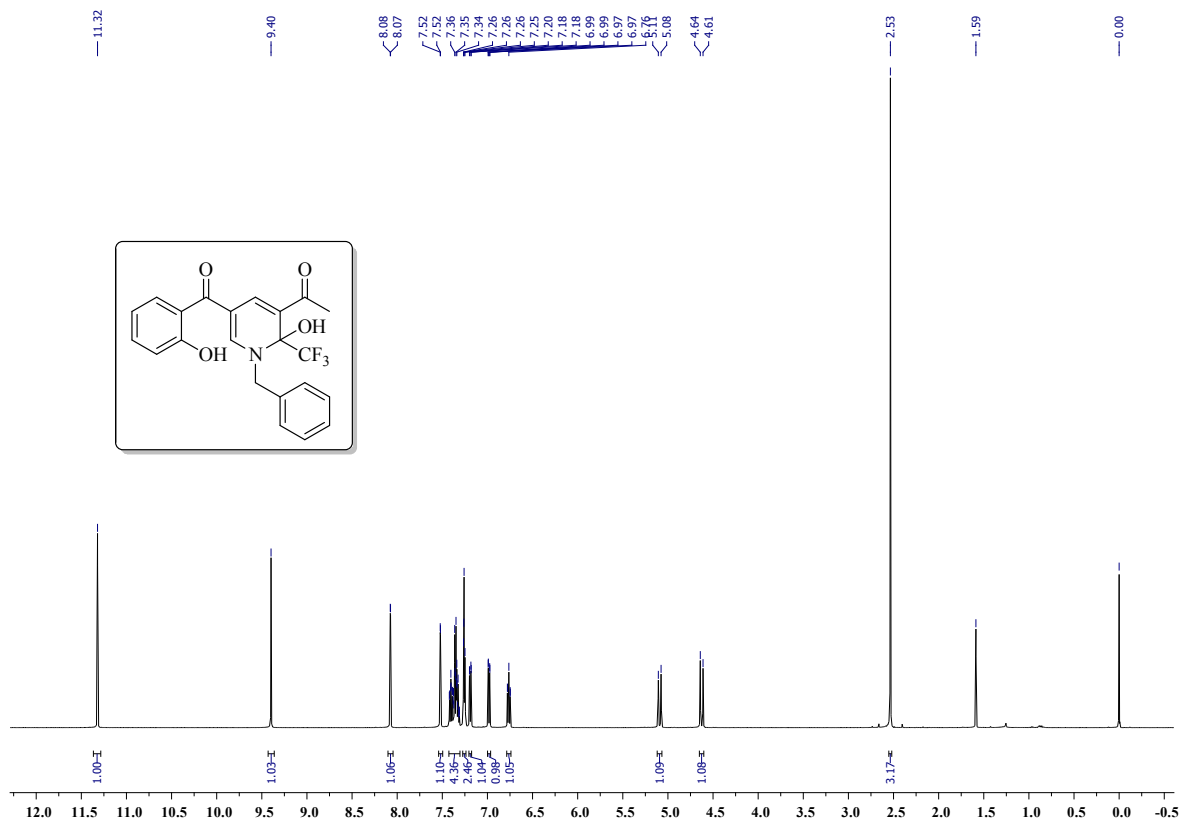

<sup>1</sup>H NMR spectrum of compound **4i**

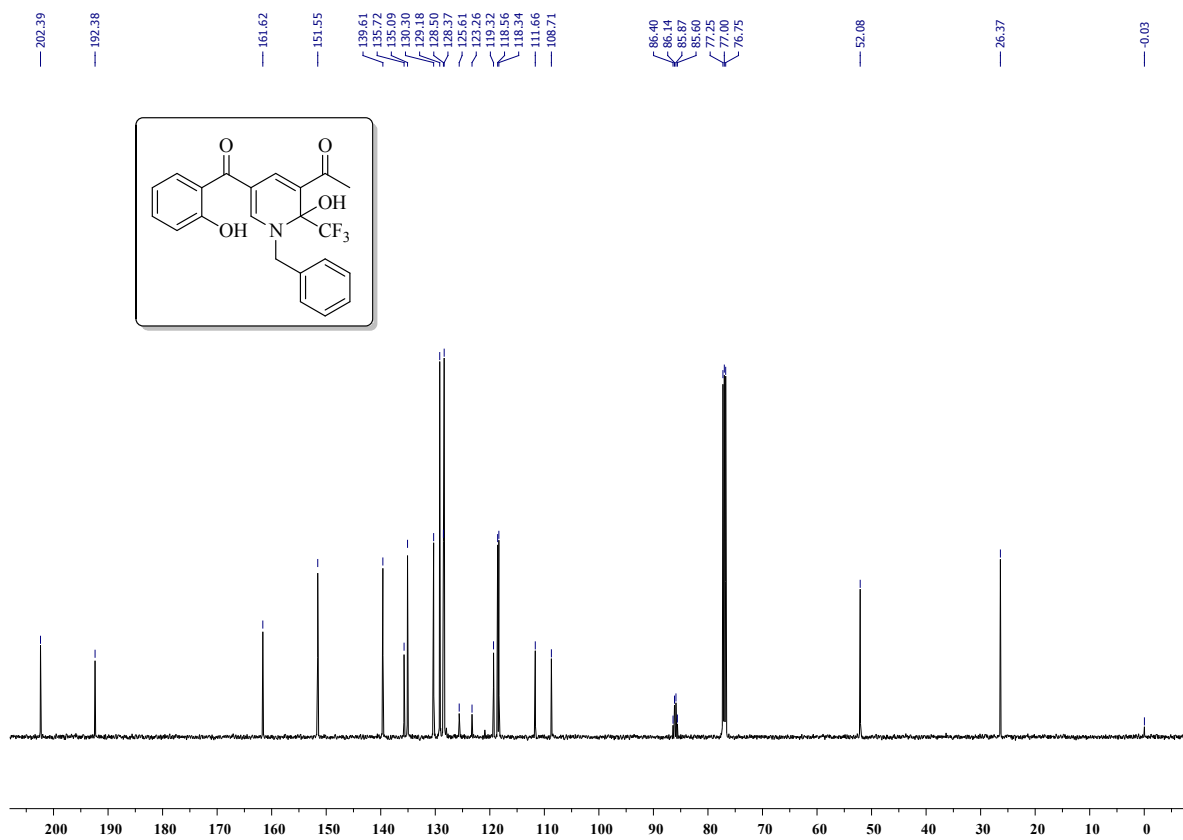

<sup>13</sup>C NMR spectrum of compound **4i**

File Name C:\ICT-HRMS\30.09.2014\BCR-FBA-CF3ME

Sample Name

Sample ID K-RAJKUMAR

Date and Time 30-09-14 16:30:56

BCR-FBA-CF3ME #2-38 RT: 0.02-0.30 AV: 35 SB: 100 0.80-1.90 NL: 2.92E7  
T: FTMS (1,1) + p ESI Full ms [110.00-2000.00]

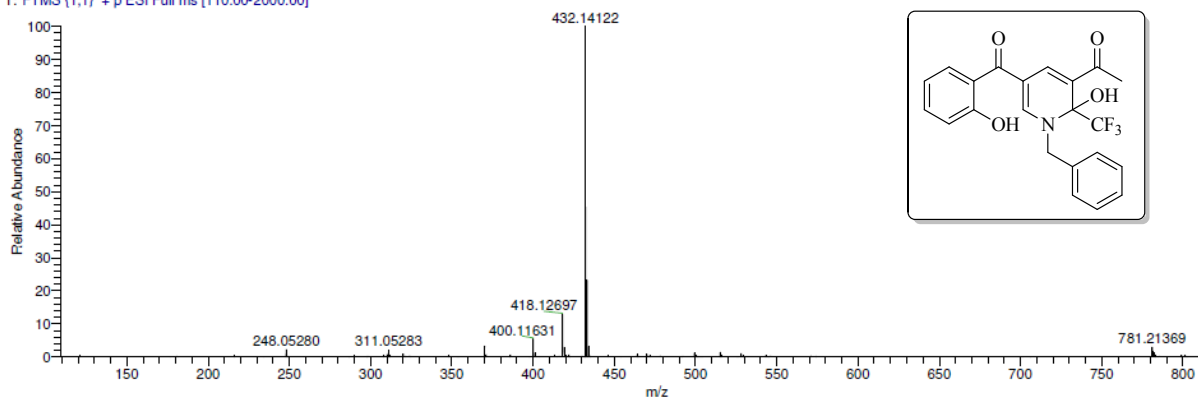

BCR-FBA-CF3ME#8-30 RT: 0.07-0.24 AV: 23

T: FTMS (1,1) + p ESI Full ms [110.00-2000.00]

m/z = 410.92-445.68

| m/z       | Intensity  | Relative | Theo. Mass | Delta (ppm) | RDB equiv. | Composition                                                      |
|-----------|------------|----------|------------|-------------|------------|------------------------------------------------------------------|
| 432.14117 | 31840294.0 | 100.00   | 432.15189  | -10.72      | 9.0        | C <sub>22</sub> H <sub>24</sub> O <sub>4</sub> F <sub>3</sub> Na |

HRMS spectrum of compound 4i

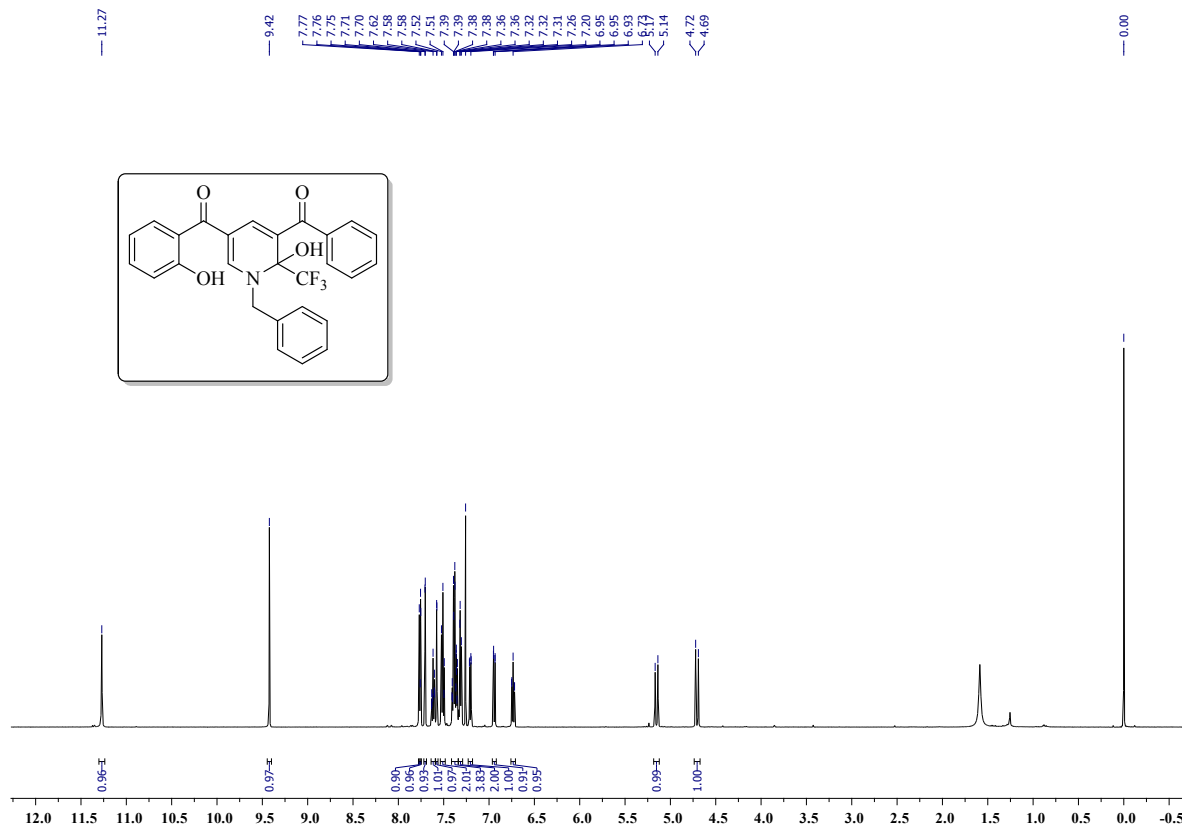

<sup>1</sup>H NMR spectrum of compound 4j

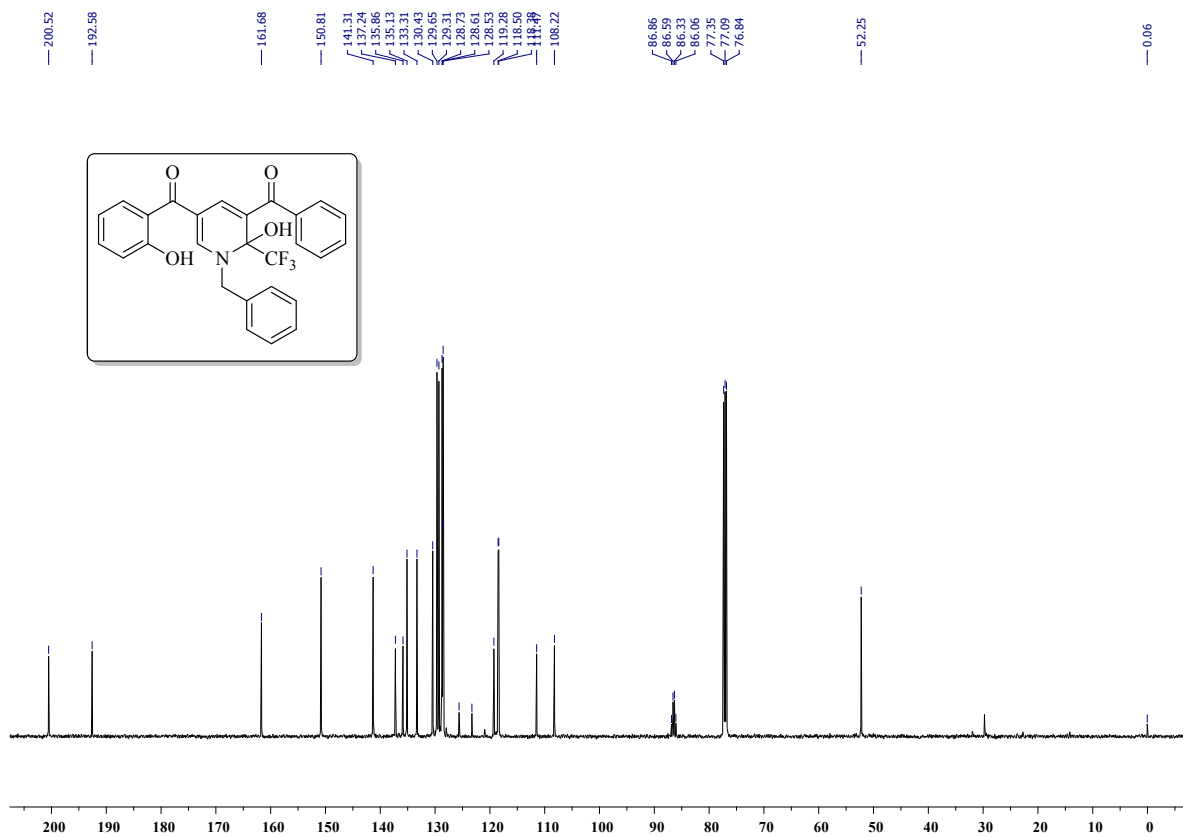

<sup>13</sup>C NMR spectrum of compound 4j

C:\ICT-HRMS\11.02.2014\BCR-FBA-CF3PH

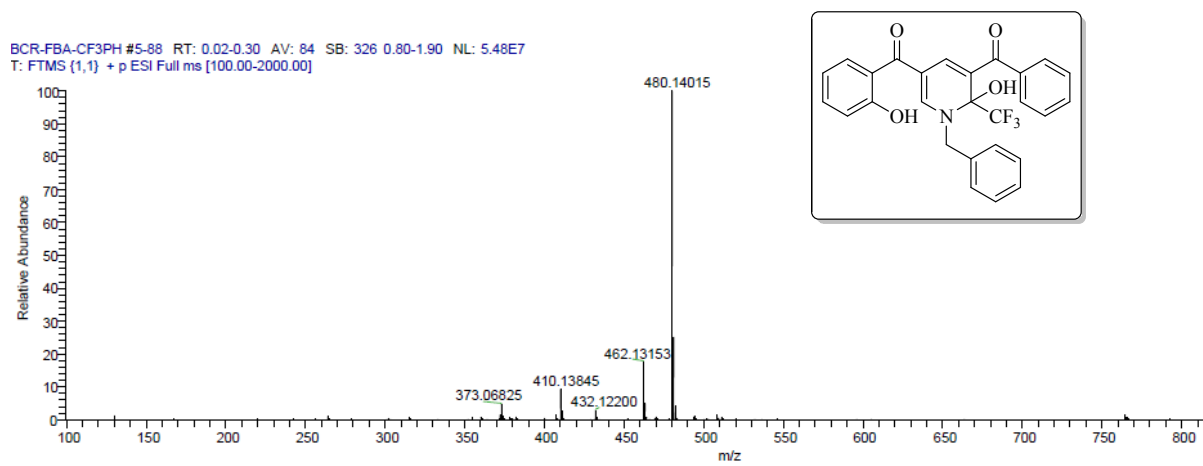

BCR-FBA-CF3PH#8-30 RT: 0.03-0.10 AV: 23  
T: FTMS {1,1} + p ESI Full ms [100.00-2000.00]

m/z = 474.51-483.80

| m/z       | Intensity  | Relative | Theo. Mass | Delta (ppm) | RDB equiv. | Composition                                                       |
|-----------|------------|----------|------------|-------------|------------|-------------------------------------------------------------------|
| 480.14025 | 36078140.0 | 100.00   | 480.13931  | 1.95        | 13.5       | C <sub>25</sub> H <sub>22</sub> O <sub>4</sub> NF <sub>3</sub> Na |

HRMS spectrum of compound 4j

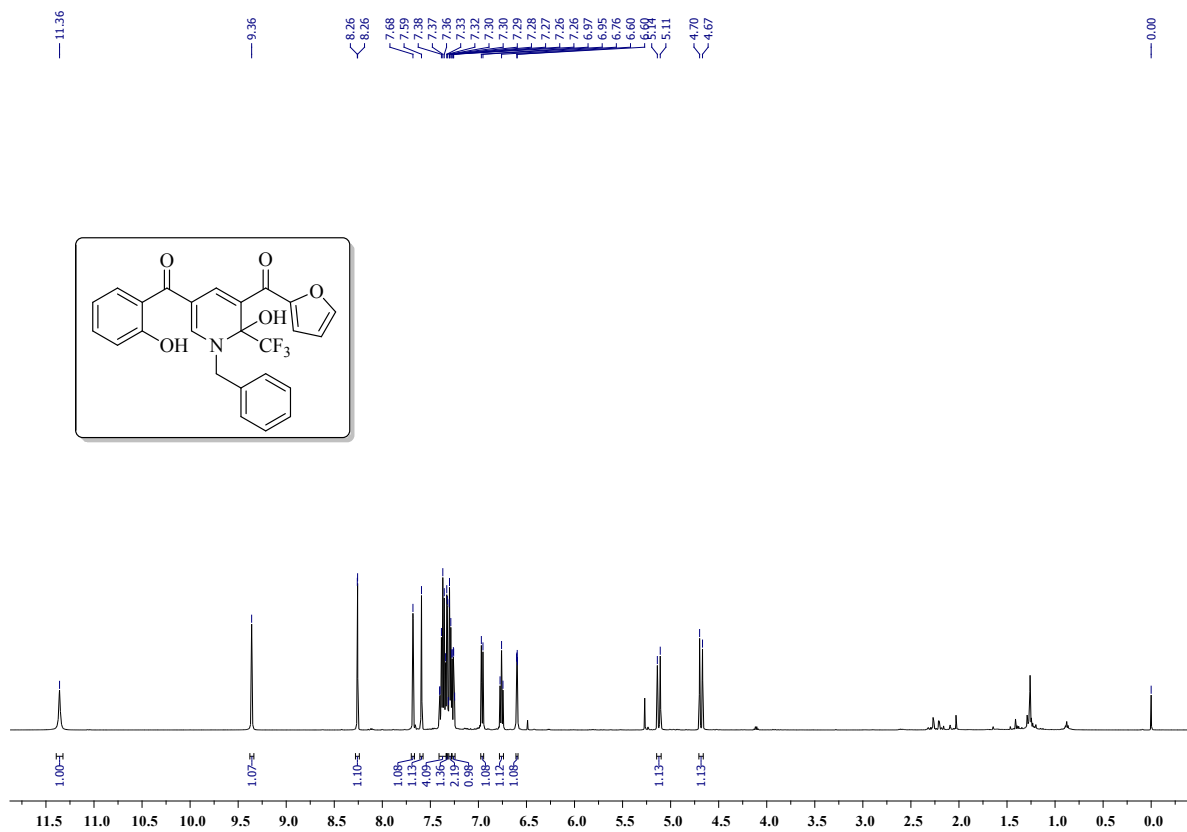

<sup>1</sup>H NMR spectrum of compound 4k

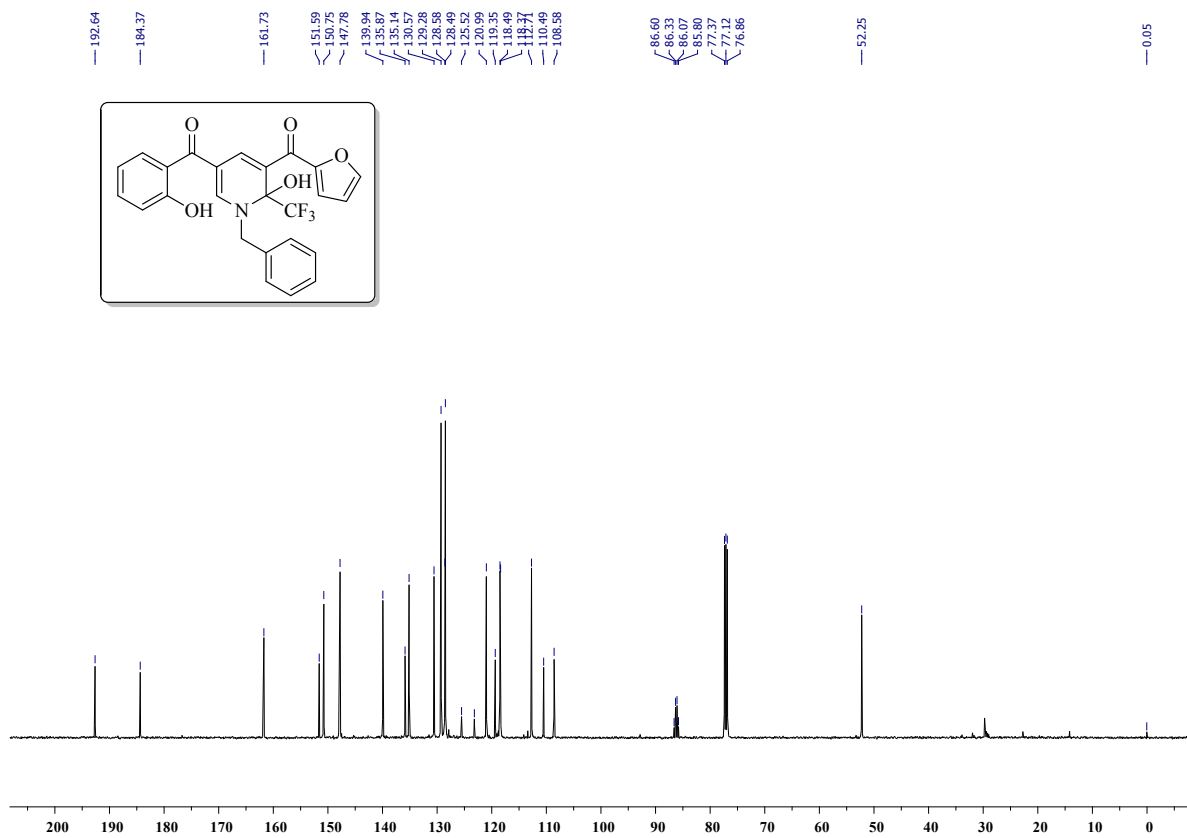

<sup>13</sup>C NMR spectrum of compound 4k

bcr-fba-cf3fu #6-88 RT: 0.02-0.30 AV: 83 SB: 327 0.80-1.90 NL: 3.82E7  
T: FTMS (1,1) + p ESI Full ms [100.00-2000.00]

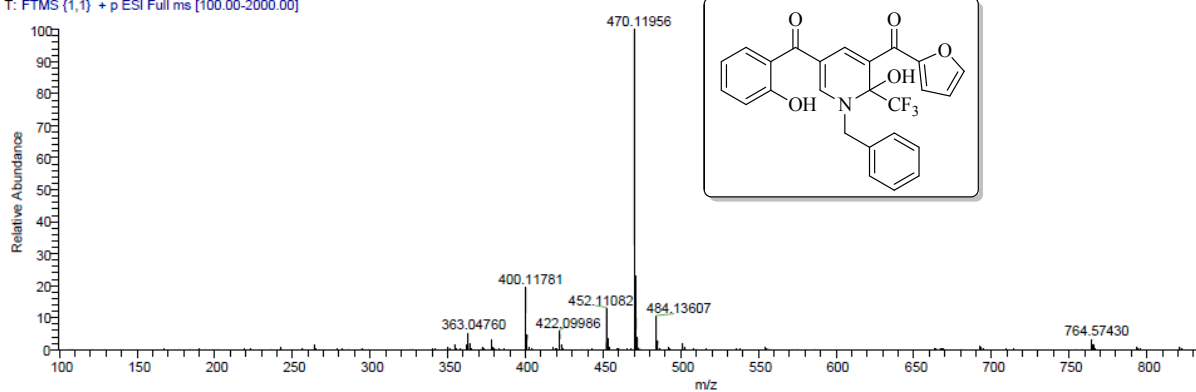

bcr-fba-cf3fu#8-30 RT: 0.03-0.10 AV: 23

T: FTMS (1,1) + p ESI Full ms [100.00-2000.00]

| m/z       | Intensity  | Relative | Theo. Mass | Delta (ppm) | RDB equiv. | Composition                                                    |
|-----------|------------|----------|------------|-------------|------------|----------------------------------------------------------------|
| 470.11978 | 32040270.0 | 100.00   | 470.12098  | -2.57       | 15.5       | C <sub>25</sub> H <sub>19</sub> O <sub>5</sub> NF <sub>3</sub> |

HRMS spectrum of compound 4k

## General procedure for the preparation of 2-hydroxybenzoyl-1,2-dihydropyridone-3-carboxylates **5a-e**

Ethyl 4,4,4-trichloro-3-oxobutanoate (**3h**, 1.5 mmol) was added to a stirred solution of 4-oxo-4*H*-chromene-3-carbaldehyde (**1a**, 1 mmol) and phenylmethanamine (**2b**, 1.2 mmol) in CH<sub>3</sub>CN (2 mL). The contents were stirred under reflux conditions for 6 h. After completion of the reaction (TLC), the residue was purified by column chromatography by using silica gel (100:200, ethyl acetate/hexane 24:76) afforded 2-hydroxybenzoyl-1,2-dihydropyridone-3-carboxylates **5a**. Similarly, compounds **5b-e** were prepared from corresponding 3-formylchromones **1a-c** and benzylamines **2b-d**.

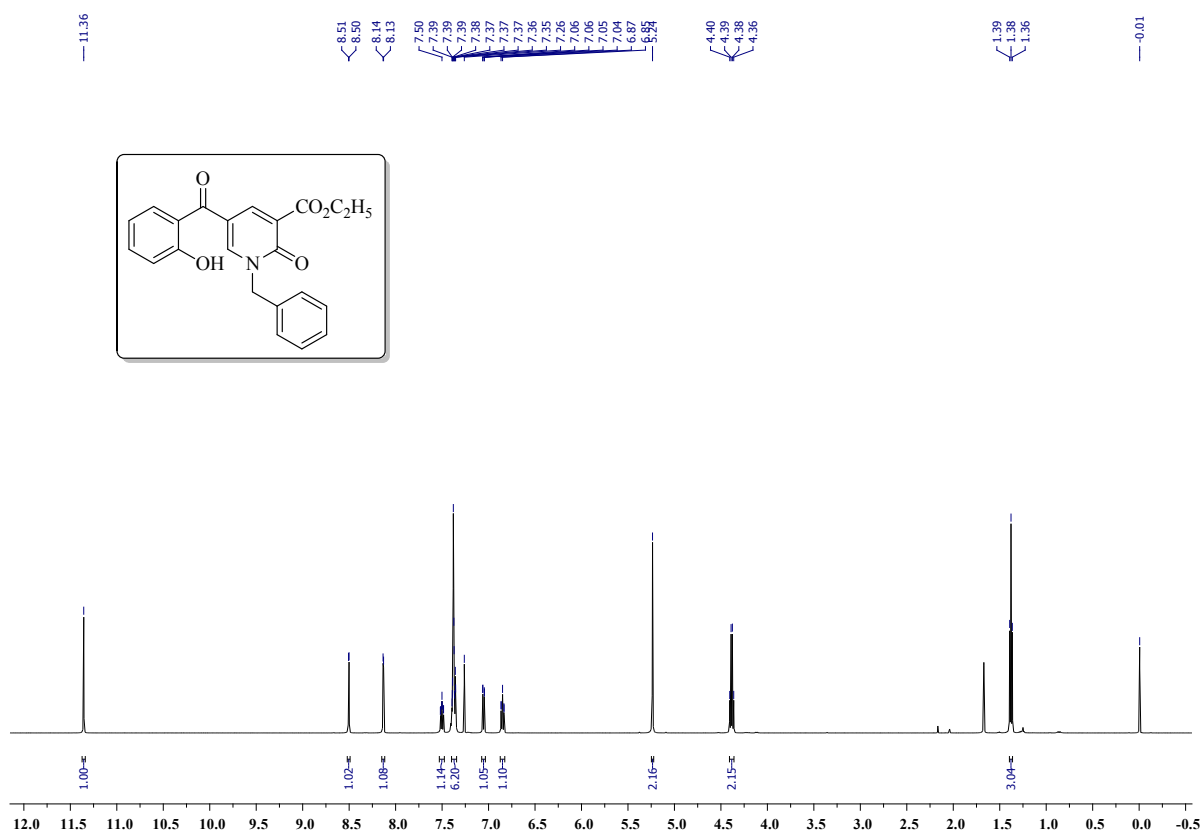

<sup>1</sup>H NMR spectrum of compound **5a**

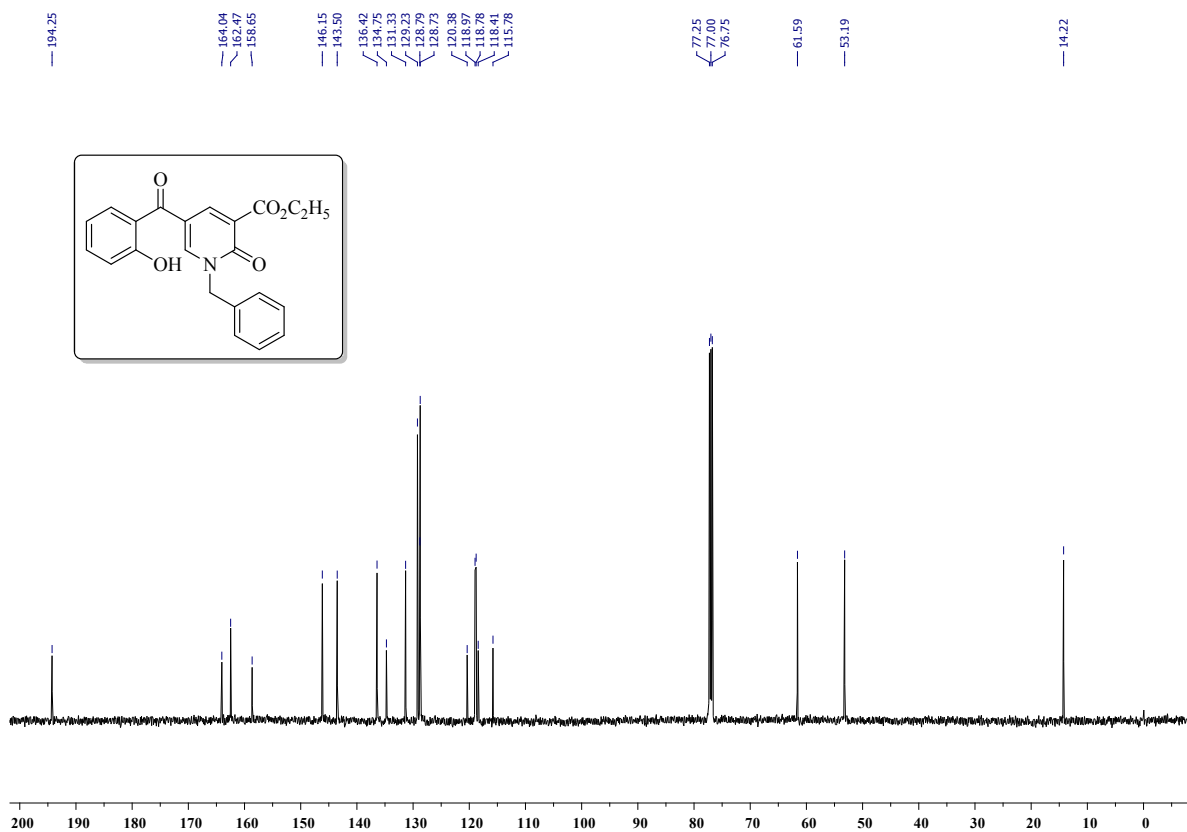

<sup>13</sup>C NMR spectrum of compound 5a

National Centre for Mass Spectrometry  
CSIR-Indian Institute of Chemical Technology

File Name C:\NICT-HRMS\22.07.2014\BCR-FBA-CCL3F  
Sample Name  
Sample ID K R KIMAR  
Date and Time 22-07-14 13:03:42  
BCR-FBA-CCL3F#5-88 RT: 0.02-0.30 AV: 84 SB: 327 0.80-1.90 NL: 2.21E7  
T: FTMS (1,1) + p ESI Full ms [100.00-2000.00]

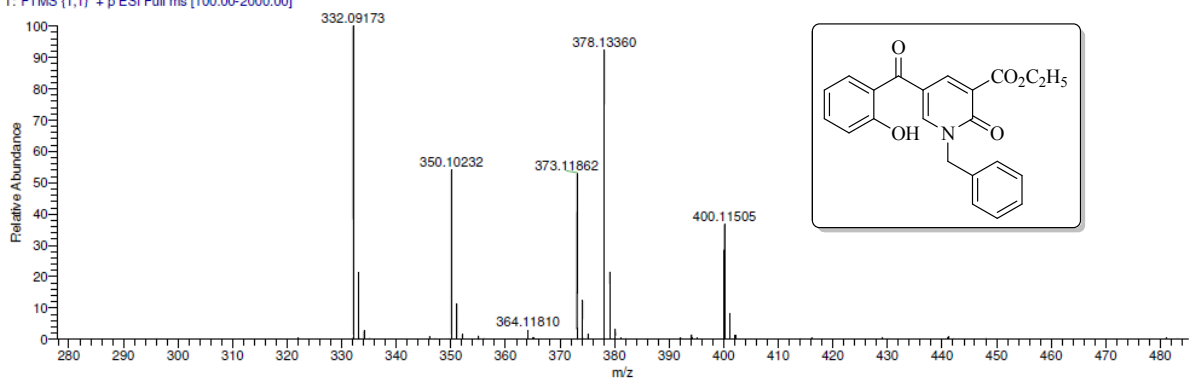

BCR-FBA-CCL3F#8-30 RT: 0.03-0.11 AV: 23  
T: FTMS (1,1) + p ESI Full ms [100.00-2000.00]  
m/z= 393.68-406.57

| m/z       | Intensity | Relative | Theo. Mass | Delta (ppm) | RDB equiv. | Composition                                         |
|-----------|-----------|----------|------------|-------------|------------|-----------------------------------------------------|
| 400.11483 | 324511.3  | 100.00   | 400.11554  | -1.79       | 13.5       | C <sub>22</sub> H <sub>19</sub> O <sub>5</sub> N Na |

HRMS spectrum of compound 5a



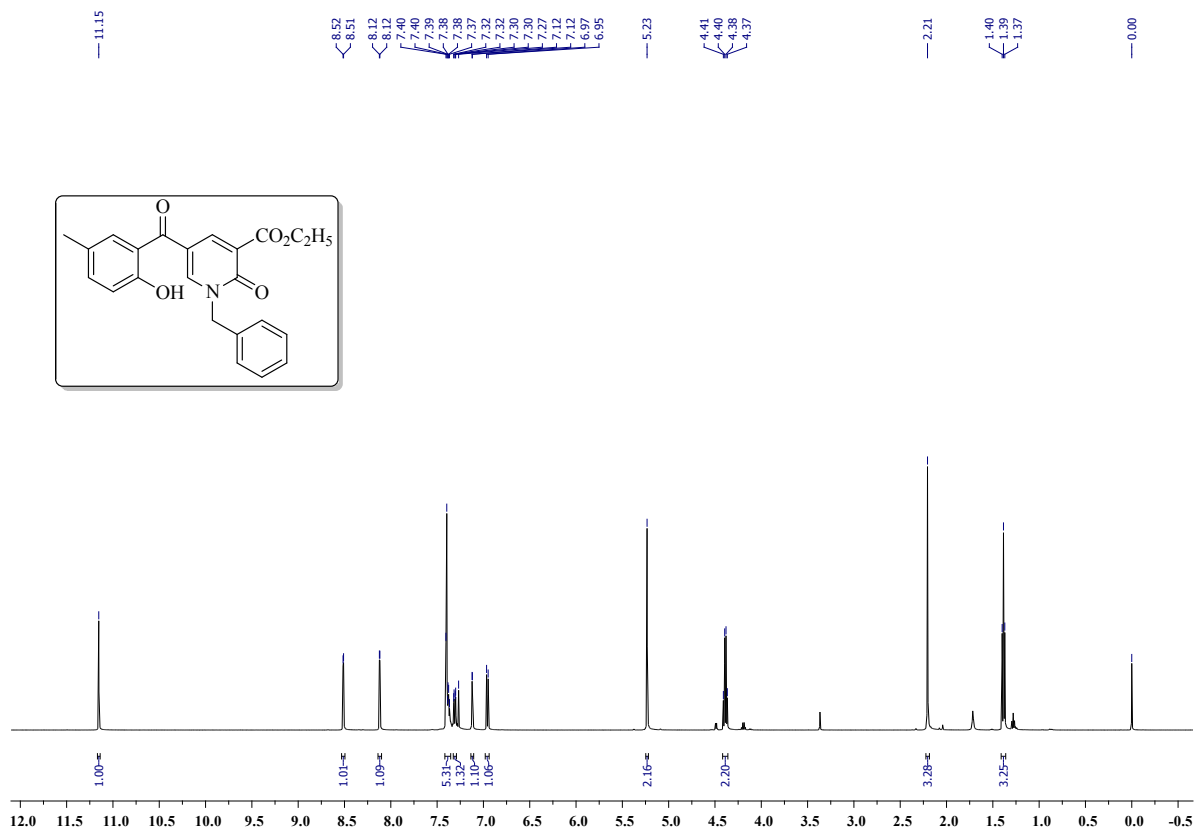

<sup>1</sup>H NMR spectrum of compound **5b**

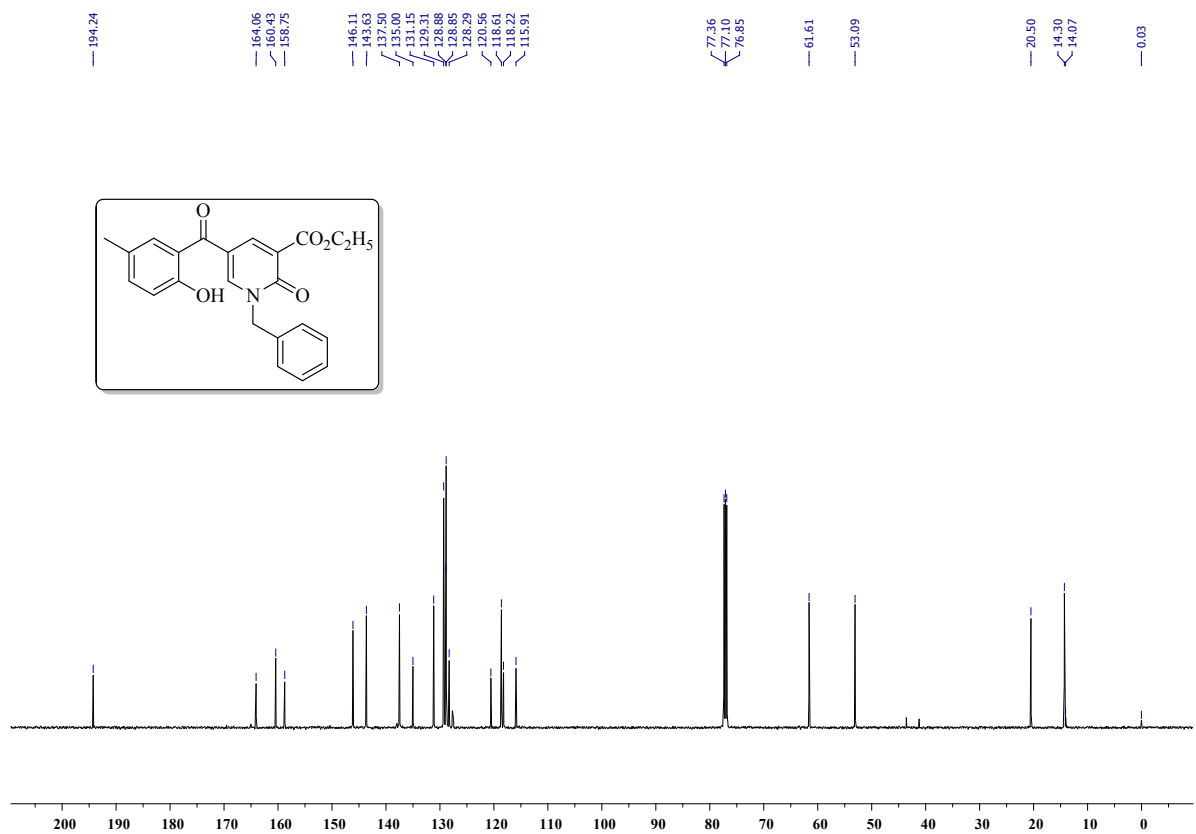

<sup>13</sup>C NMR spectrum of compound **5b**

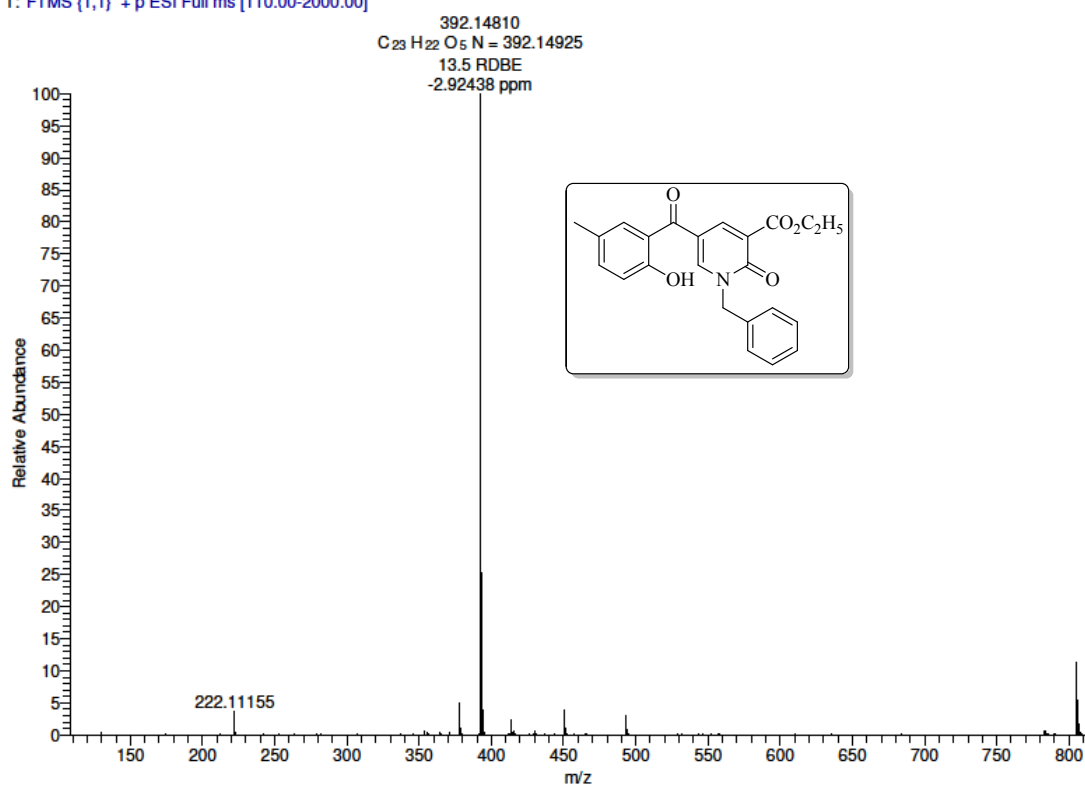

HRMS spectrum of compound **5b**

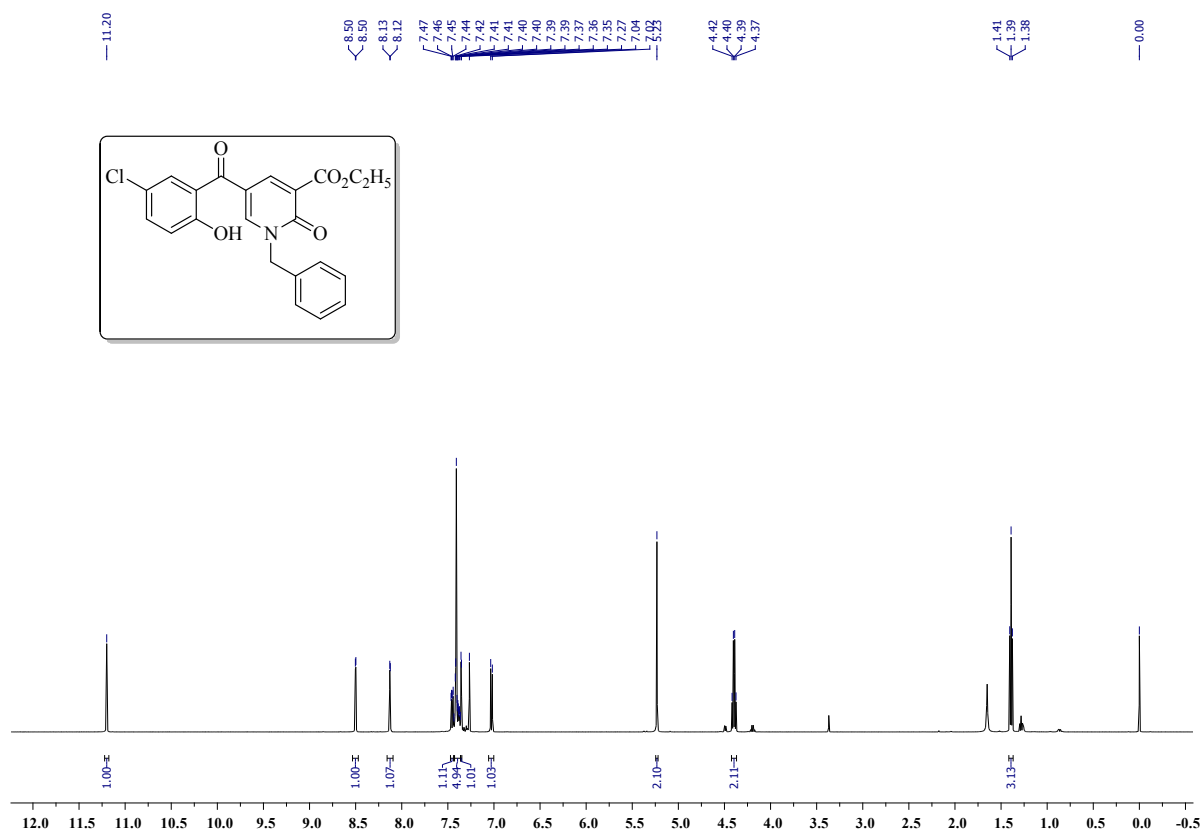

<sup>1</sup>H NMR spectrum of compound **5c**

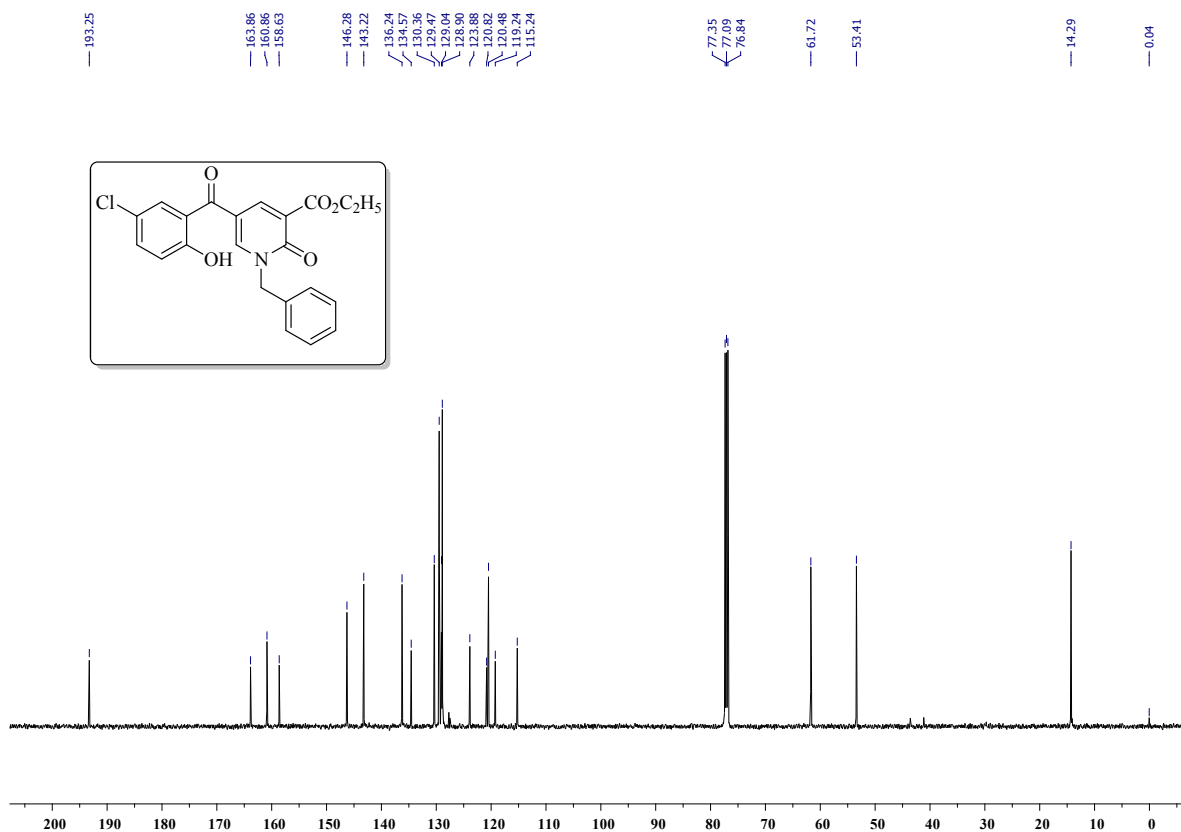

<sup>13</sup>C NMR spectrum of compound **5c**

C:\ICT-HRMS\12.11.2014\BCR-CLF-BA-CCL3  
K-RAJ-KUMAR  
BCR-CLF-BA-CCL3 #4-16 RT: 0.04-0.16 AV: 13 NL: 9.71E7  
T: FTMS (1,1) + p ESI Full ms [110.00-2000.00]

CSIR-INDIAN INSTITUTE OF CHEMICAL TECHNOLOGY  
NATIONAL CENTRE FOR MASS SPECTROMETRY

12-11-14 14:32:49

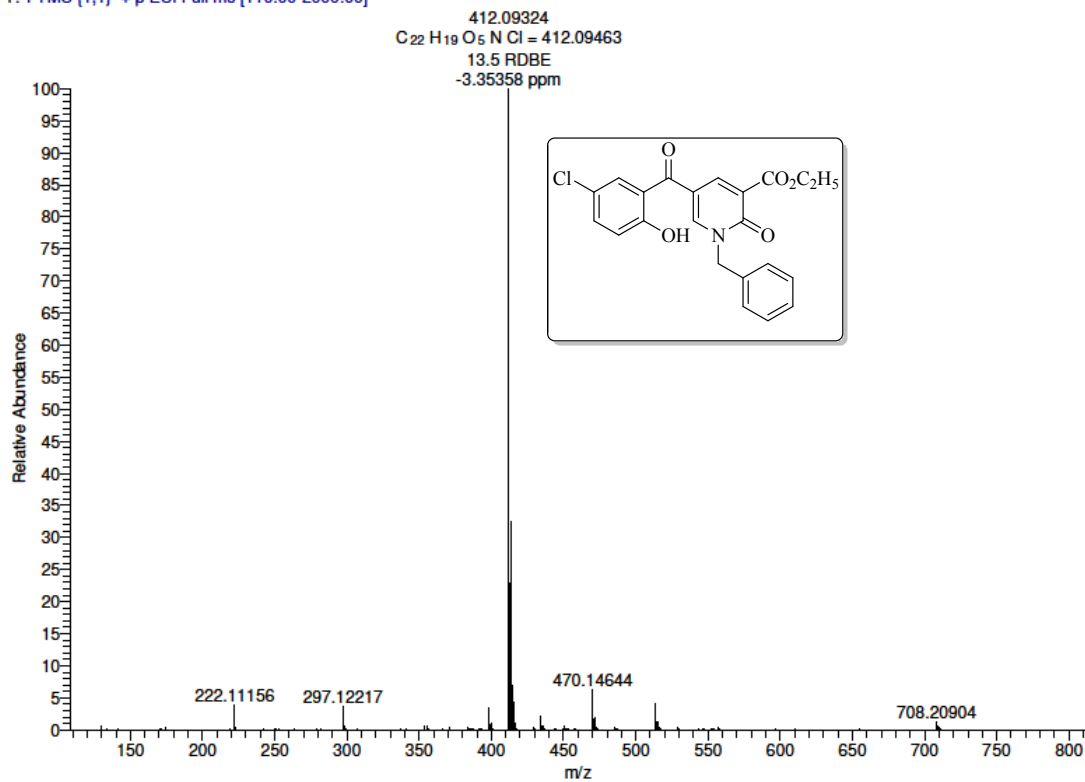

HRMS spectrum of compound **5c**

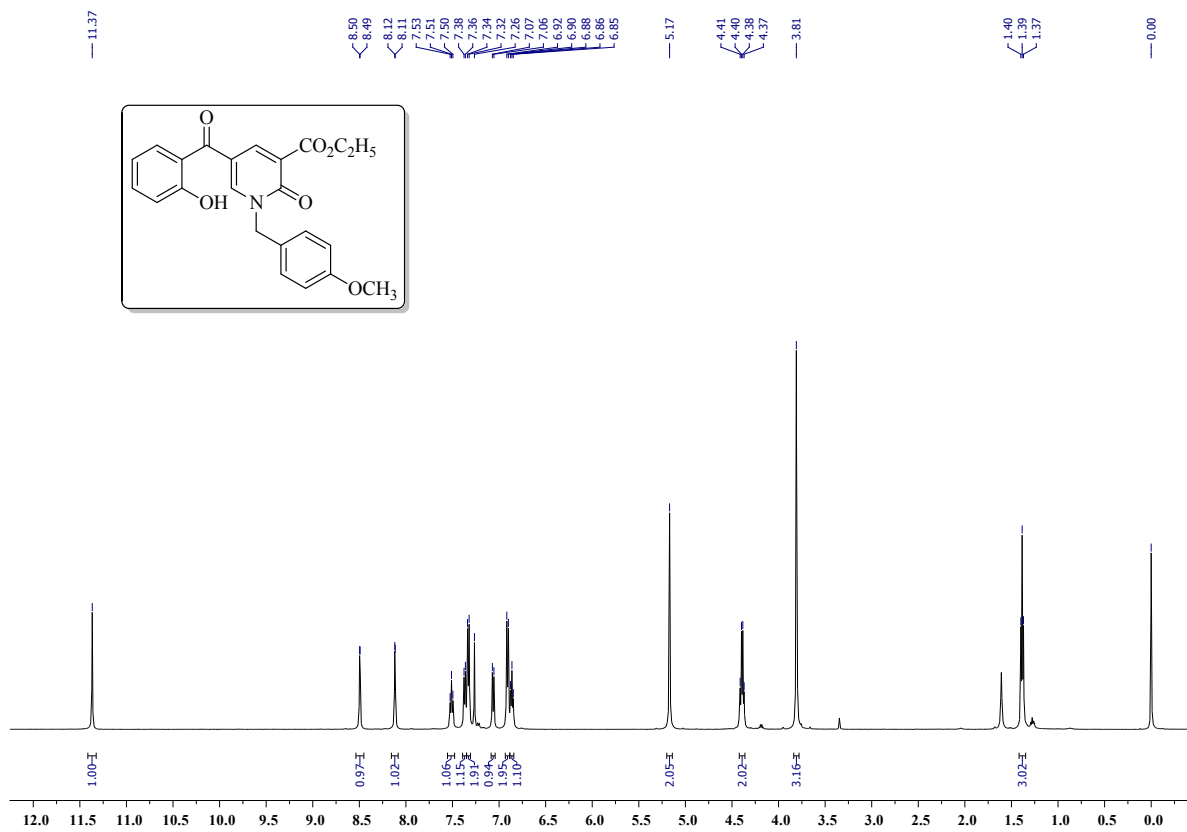

<sup>1</sup>H NMR spectrum of compound 5d

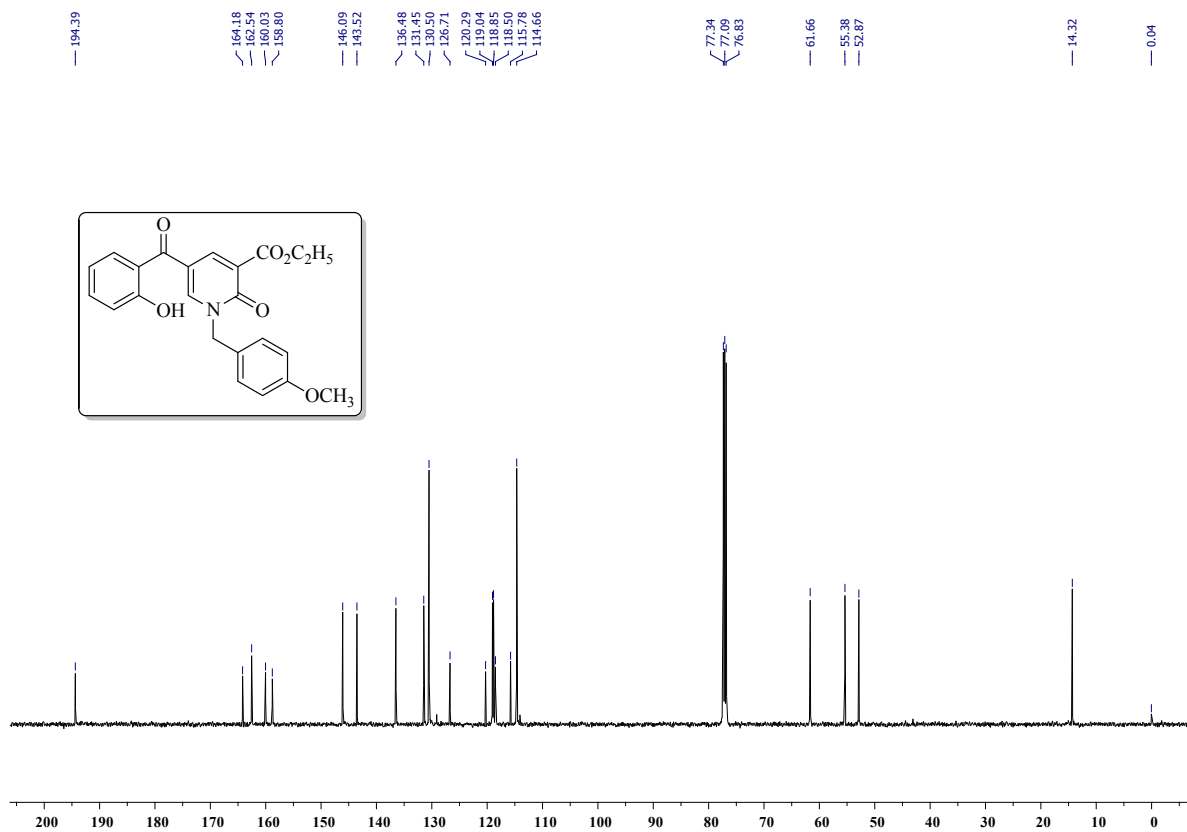

<sup>13</sup>C NMR spectrum of compound 5d

File Name C:\NICT-HRMS\...BCR-FA-OMEBA-CL3E  
Sample Name  
Sample ID K-RAJKUMAR  
Date and Time 08-09-14 22:07:18  
BCR-FA-OMEBA-CL3E#8-89 RT: 0.02-0.30 AV: 84 SB: 326 0.80-1.90 NL: 1.23E8  
T: FTMS (1,1) + p ESI Full ms [100.00-2000.00]

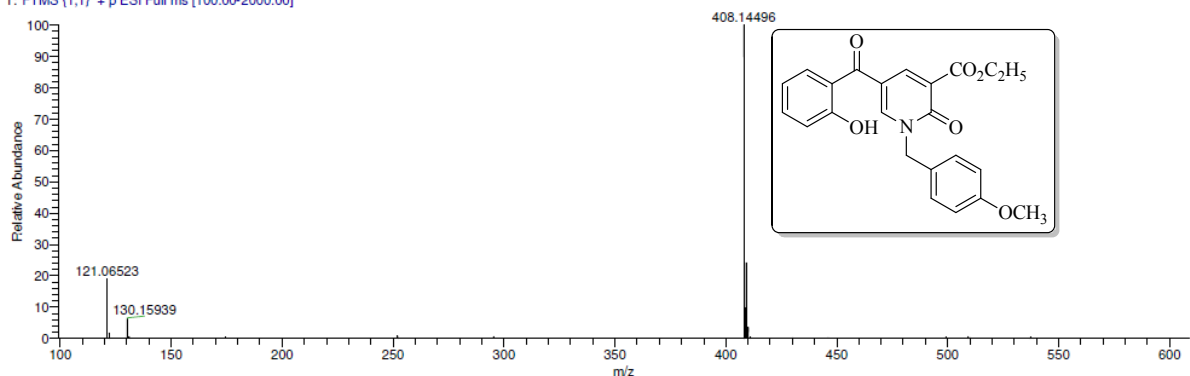

BCR-FA-OMEBA-CL3E#8-30 RT: 0.03-0.10 AV: 23  
T: FTMS (1,1) + p ESI Full ms [100.00-2000.00]  
m/z= 376.88-451.13

| m/z       | Intensity   | Relative | Theo. Mass | Delta (ppm) | RDB equiv. | Composition                                      |
|-----------|-------------|----------|------------|-------------|------------|--------------------------------------------------|
| 408.14495 | 102210776.0 | 100.00   | 408.14416  | 1.91        | 13.5       | C <sub>23</sub> H <sub>22</sub> O <sub>6</sub> N |

HRMS spectrum of compound 5d

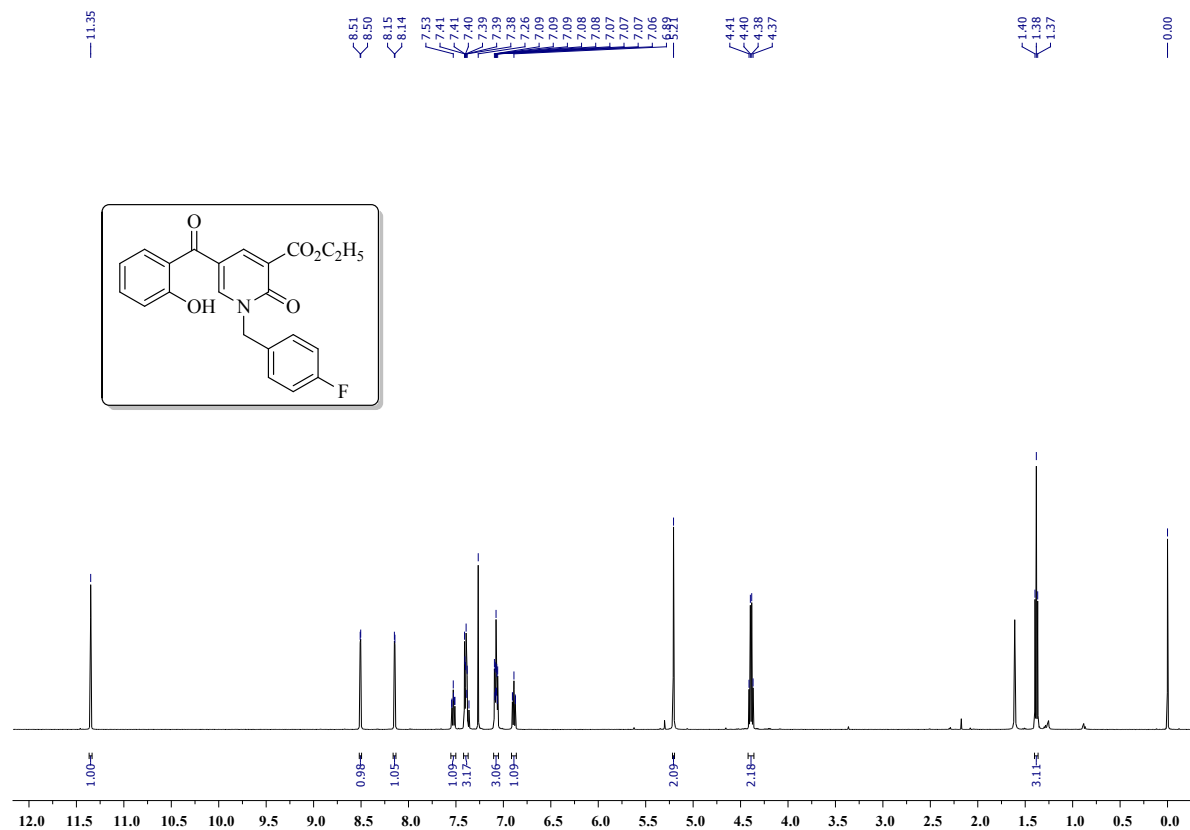

<sup>1</sup>H NMR spectrum of compound 5e

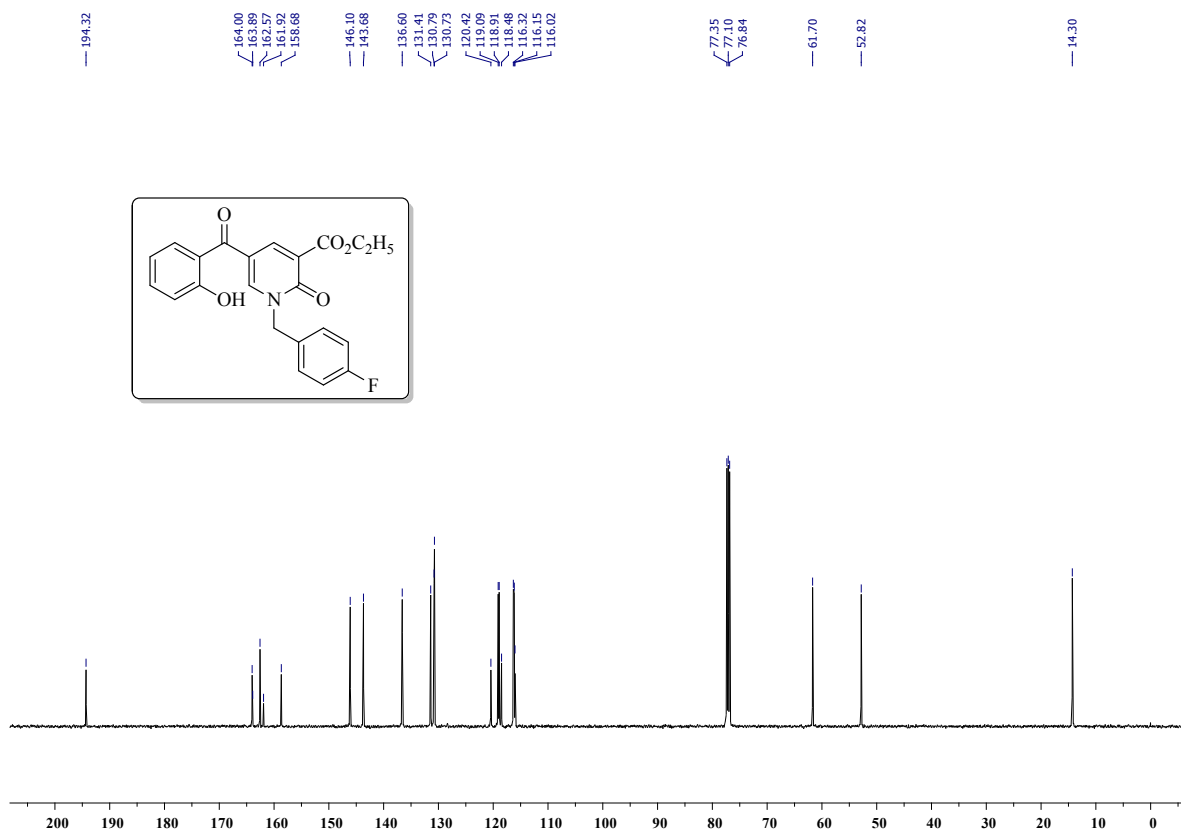

<sup>13</sup>C NMR spectrum of compound **5e**

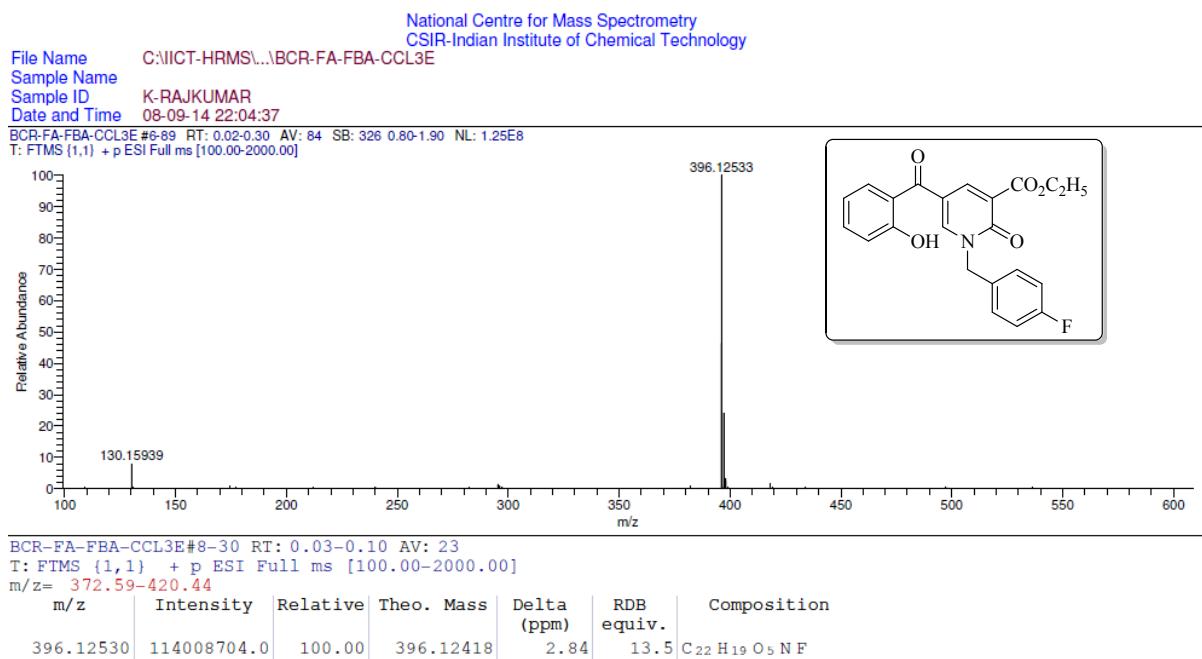

HRMS spectrum of compound **5e**

**<sup>1</sup>H NMR-Monitoring Reactions between 3-formylchromone, aniline/benzylamine and 4,4,4-trifluoro-3-oxobutanoate.**

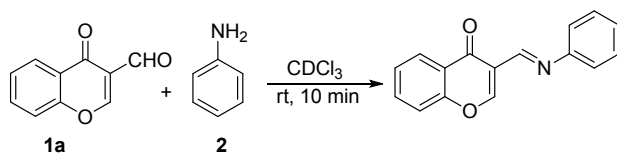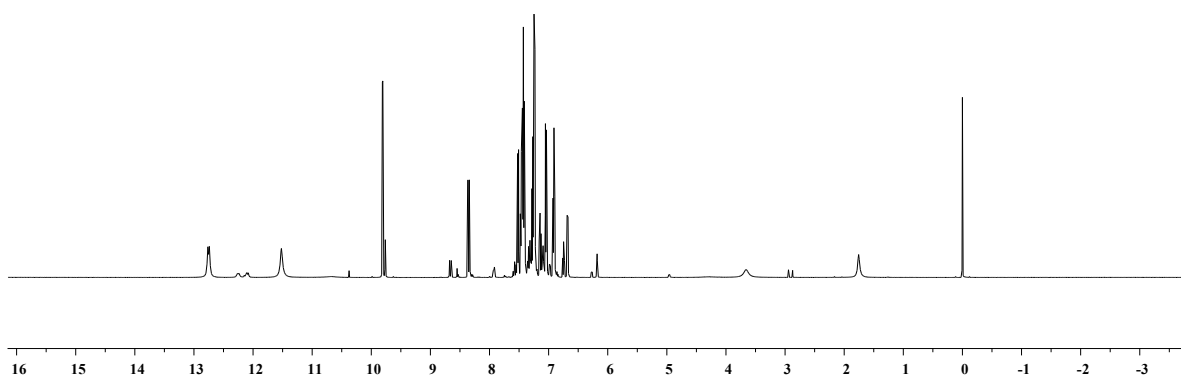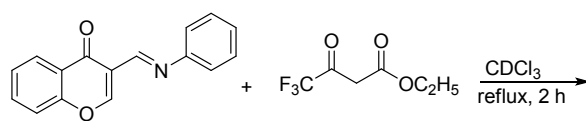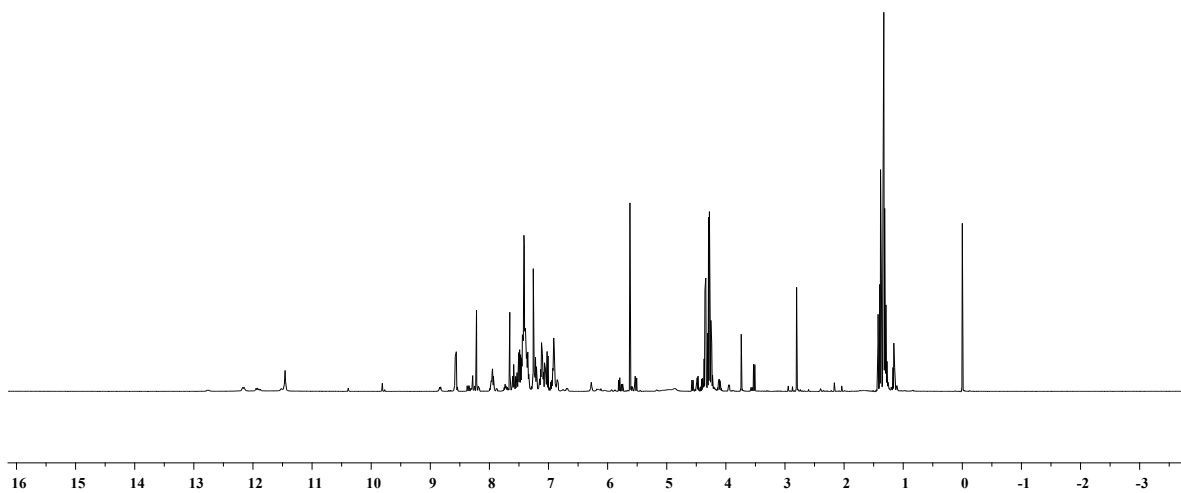

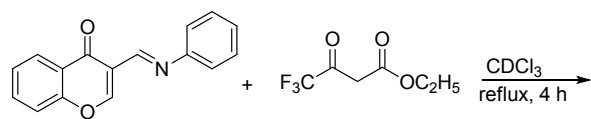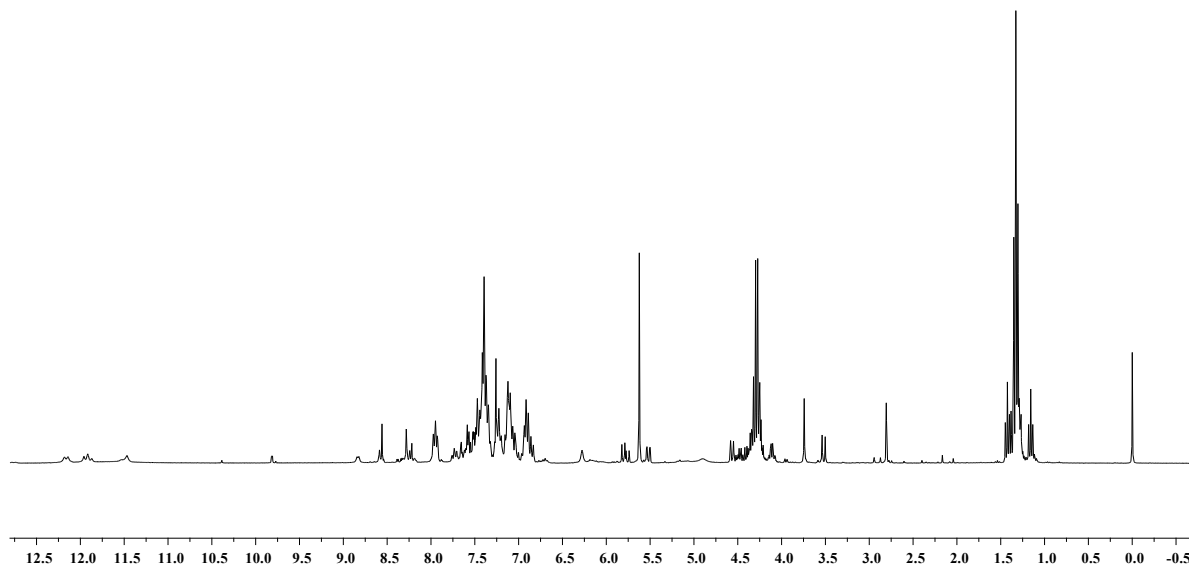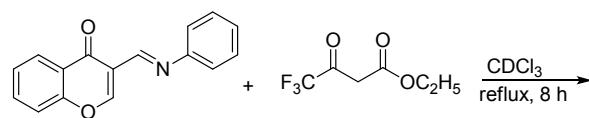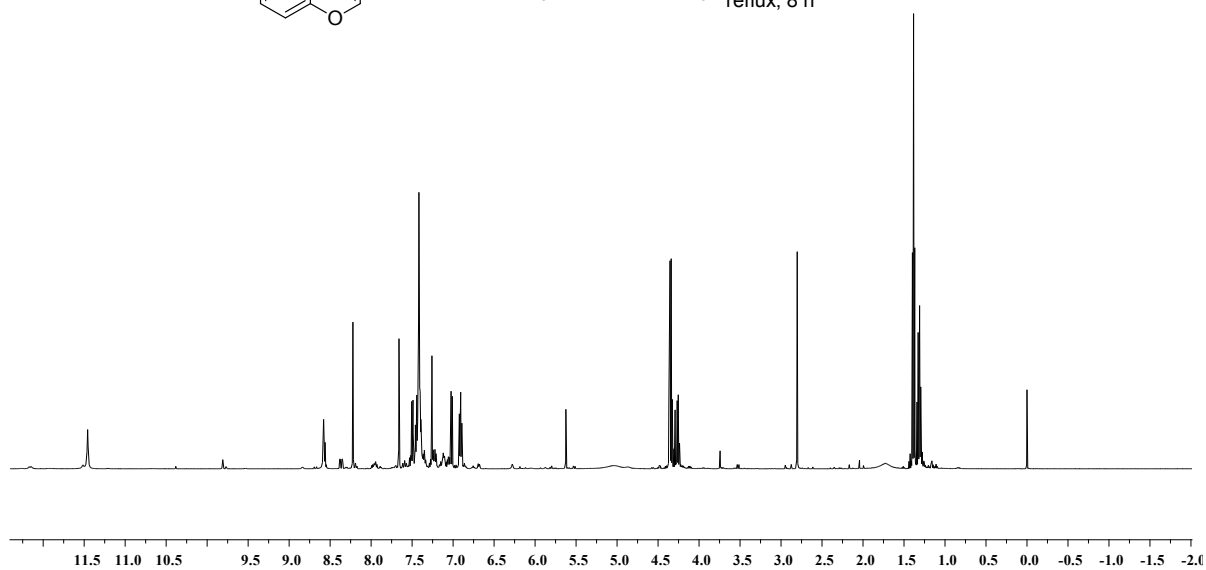



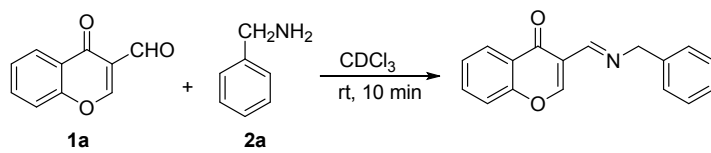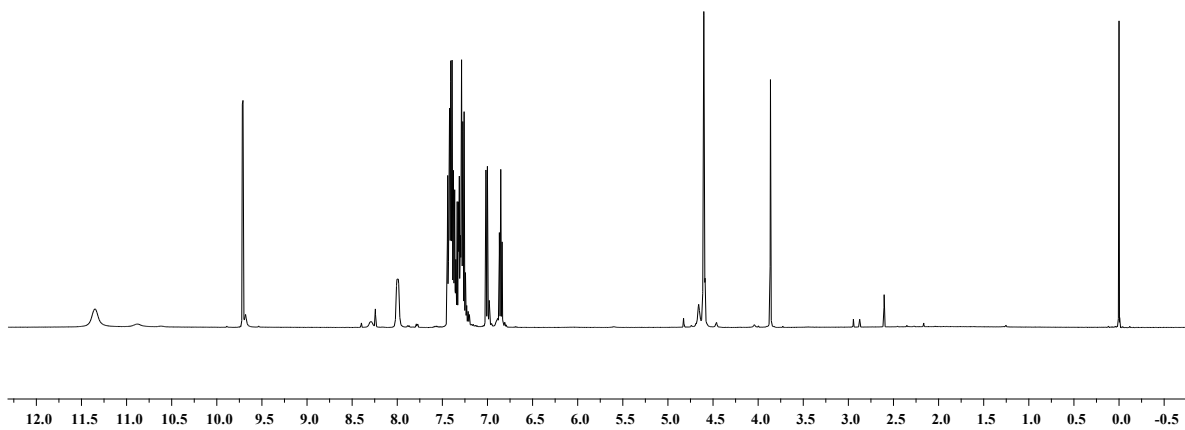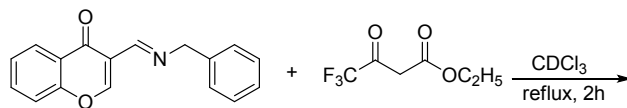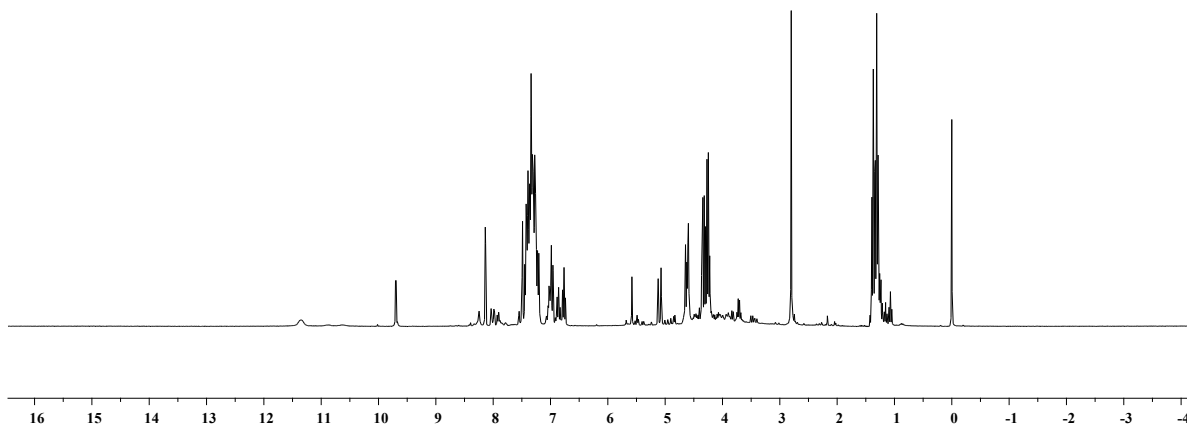

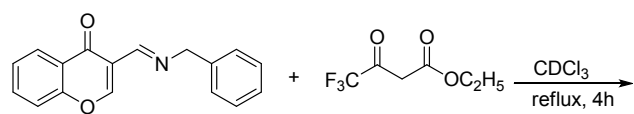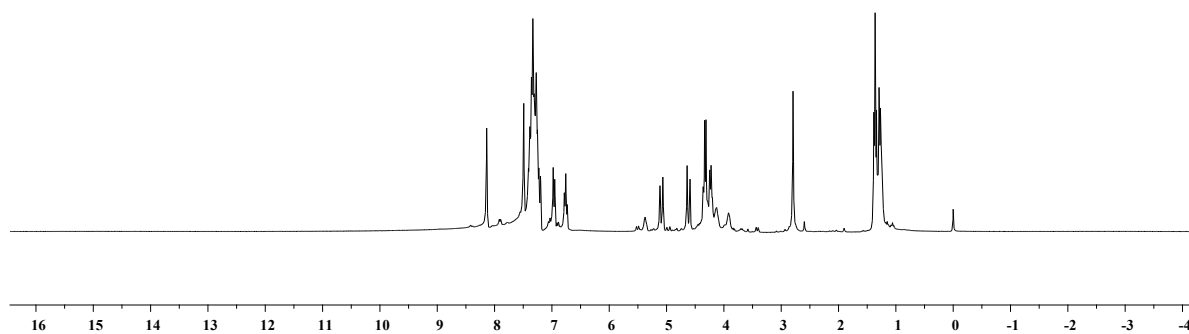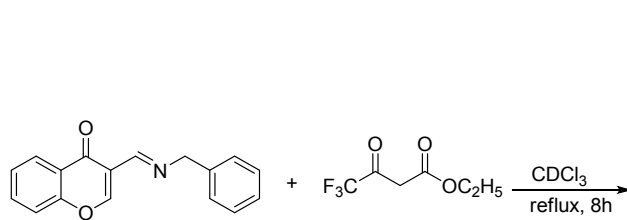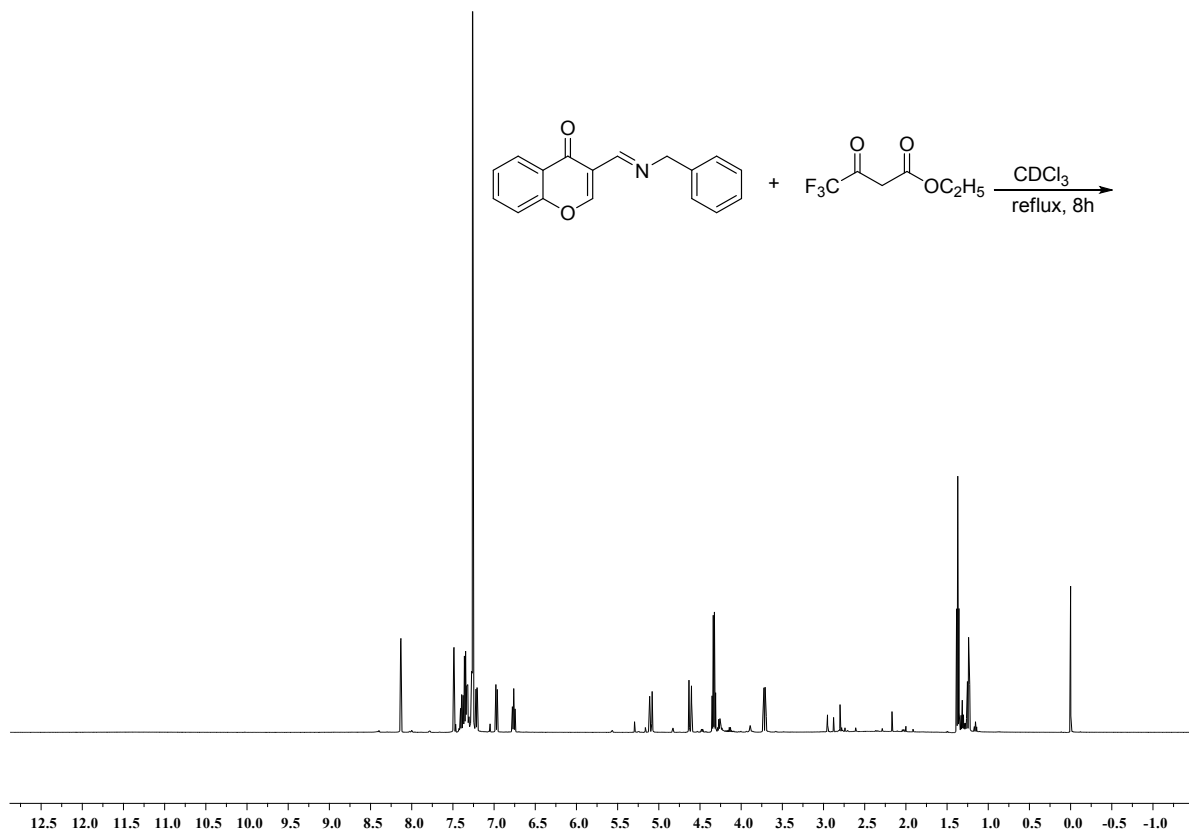

## General procedure for the preparation of 2-hydroxy-benzoyl-trifluoromethyl-benzopyrido-1,3-oxazole-4-carboxylates **7a-f**.

Ethyl 4,4,4-trifluoro-3-oxobutanoate (**3a**, 1.5 mmol) was added to a stirred solution of 4-oxo-4*H*-chromene-3-carbaldehyde (**1a**, 1 mmol) and 2-aminophenol (**6a**, 1.2 mmol) in CH<sub>3</sub>CN (2 mL). The contents were stirred under reflux conditions for 4 h. After completion of the reaction (TLC), the residue was purified by column chromatography by using silica gel (100:200, ethyl acetate/hexane 8:92) afforded 2-hydroxybenzoyl-trifluoromethyl-benzopyrido-1,3-oxazole-4-carboxylate **7a**. Similarly, compounds **7b-f** were prepared from corresponding 3-formylchromones **1a-c** and 2-aminophenols **6a-c**.

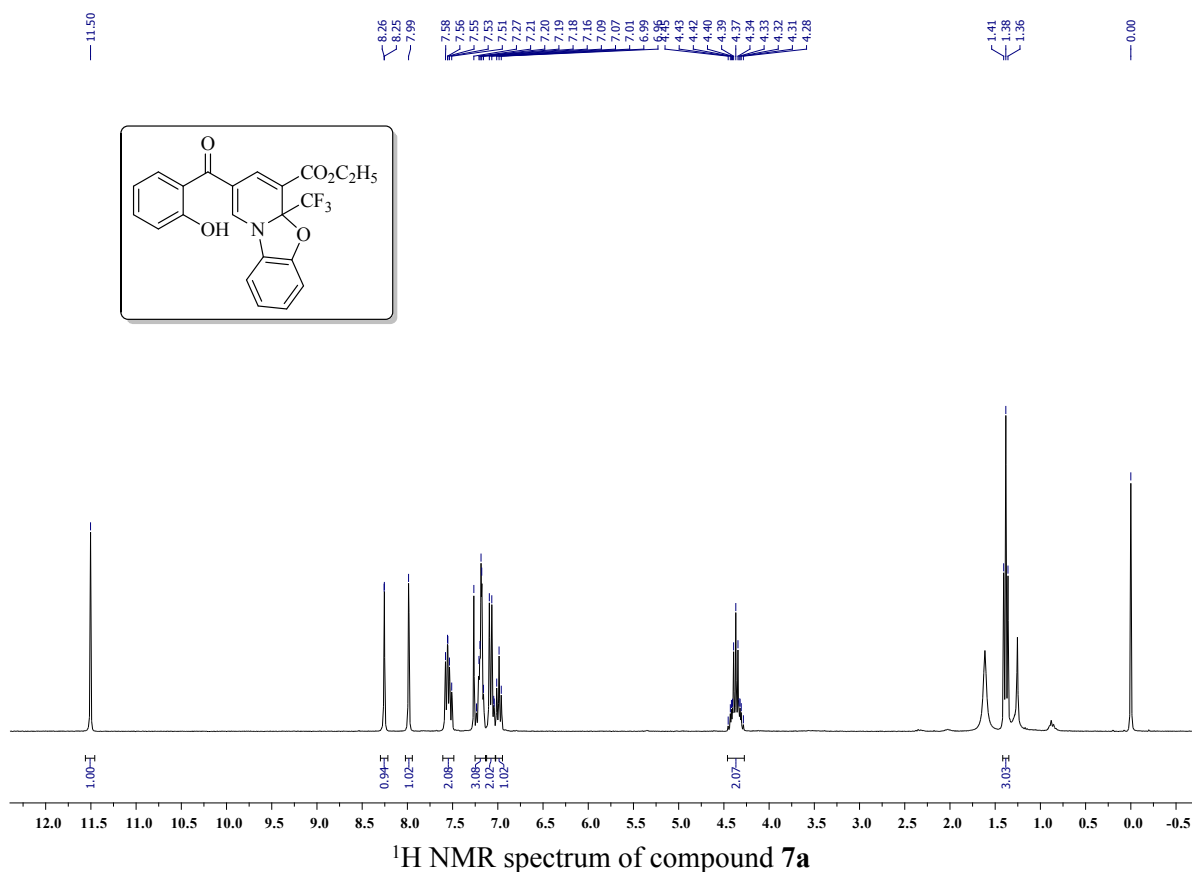

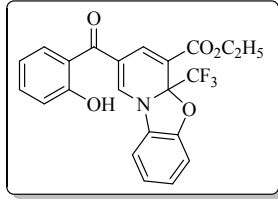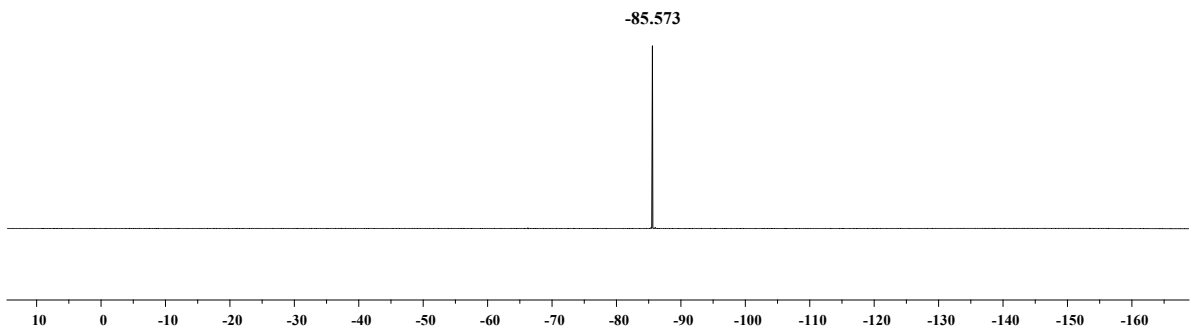

$^{19}\text{F}$  NMR spectrum of compound 7a

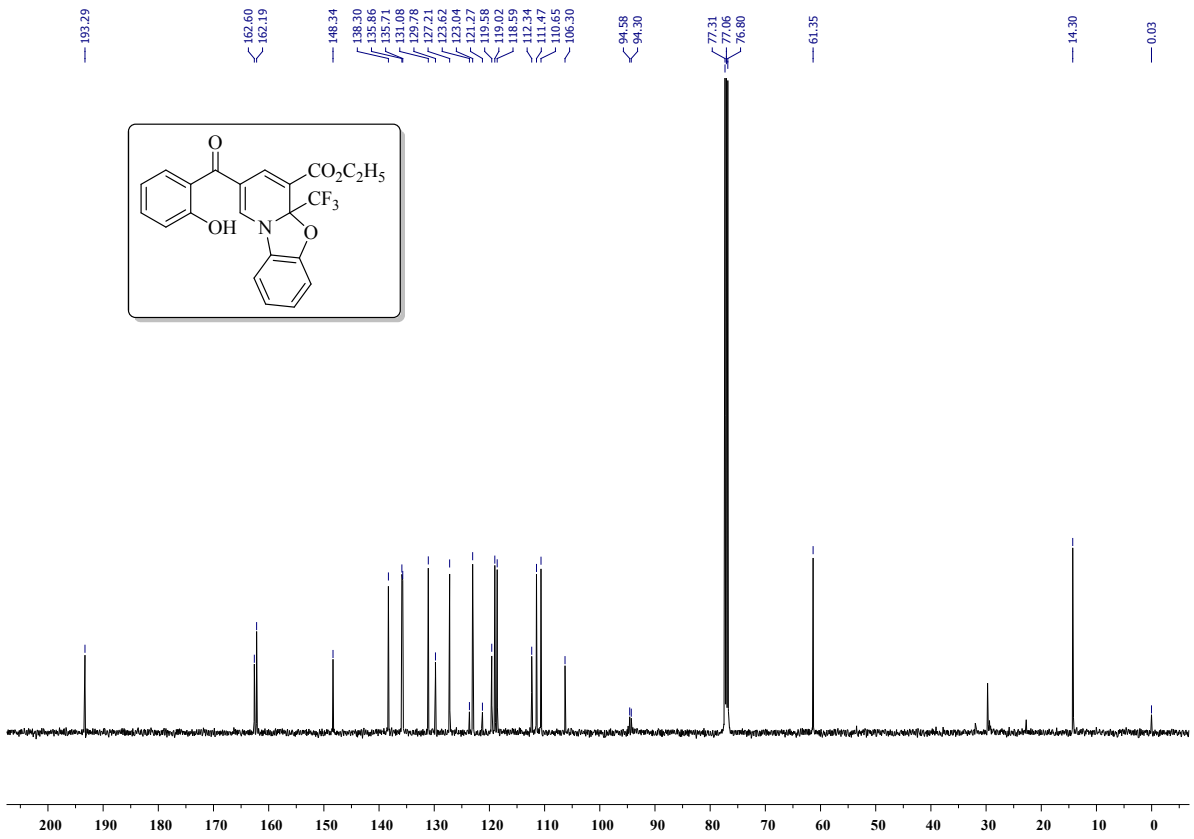

$^{13}\text{C}$  NMR spectrum of compound 7a

File Name C:\NICT-HRMS\05.02.2014\BCR-FAP-CF3  
Sample Name CH-DYAKAR  
Sample ID 1  
Date and Time 05-02-14 19:27:06

BCR-FAP-CF3 #4-62 RT: 0.02-0.21 AV: 59 SB: 420 0.57-1.99 NL: 2.45E7  
T: FTMS (1,1) + p ESI Full ms [100.00-2000.00]

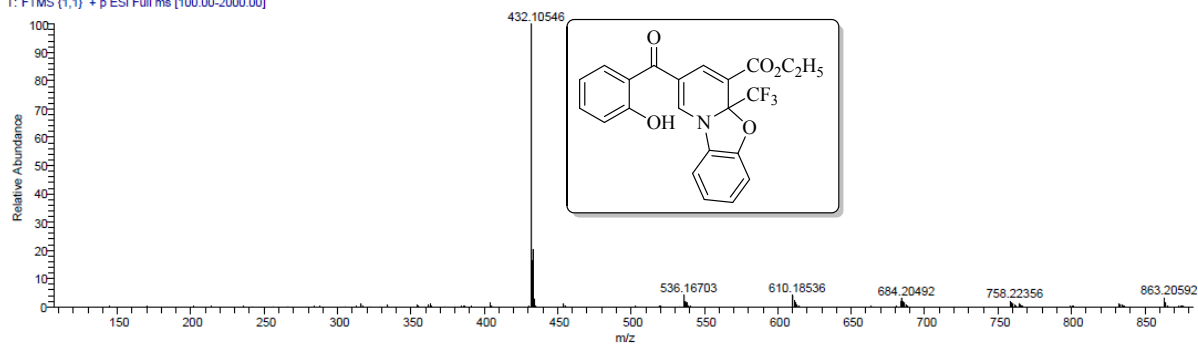

BCR-FAP-CF3#8-30 RT: 0.03-0.10 AV: 23  
T: FTMS (1,1) + p ESI Full ms [100.00-2000.00]

m/z = 407.53-451.40

| m/z       | Intensity  | Relative | Theo. Mass | Delta (ppm) | RDB equiv. | Composition                                                    |
|-----------|------------|----------|------------|-------------|------------|----------------------------------------------------------------|
| 432.10529 | 34783576.0 | 100.00   | 432.10533  | -0.10       | 13.5       | C <sub>22</sub> H <sub>17</sub> O <sub>5</sub> NF <sub>3</sub> |
| 433.10965 | 6887484.5  | 19.80    |            |             |            |                                                                |

HRMS spectrum of compound 7a

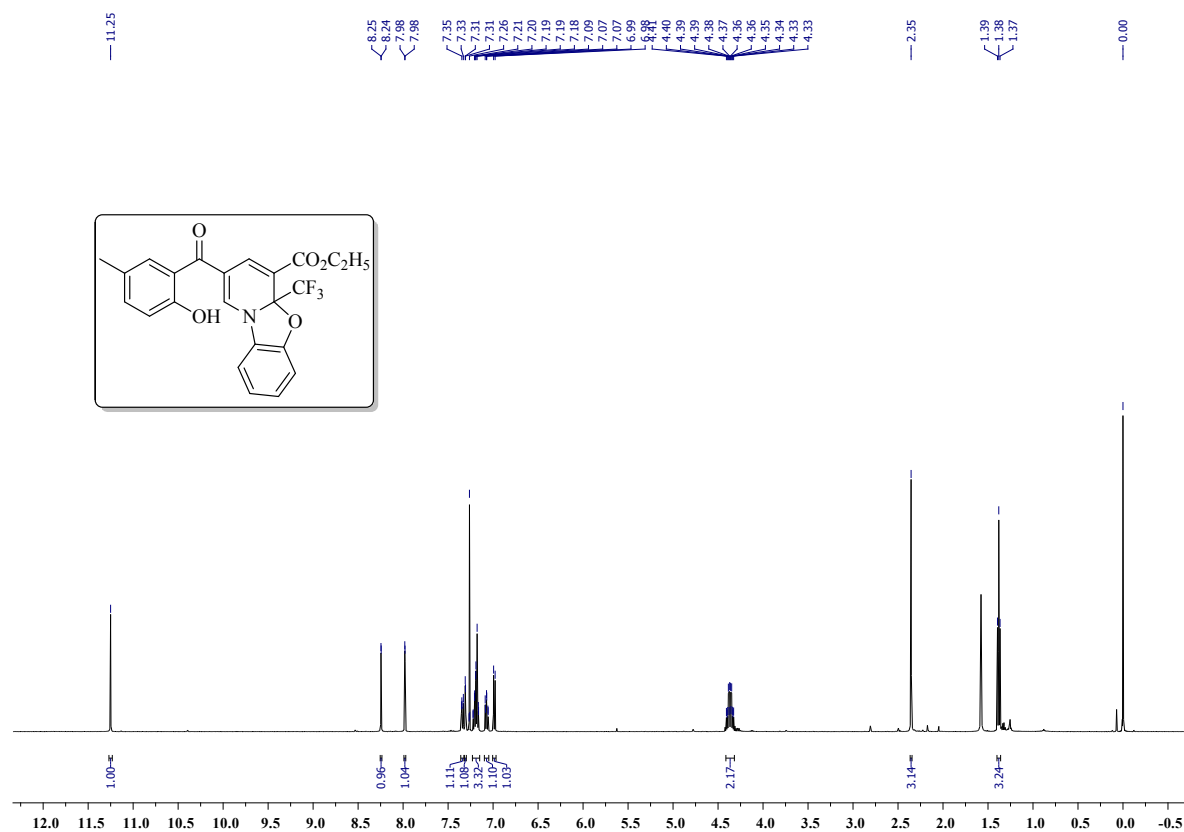

<sup>1</sup>H NMR spectrum of compound 7b

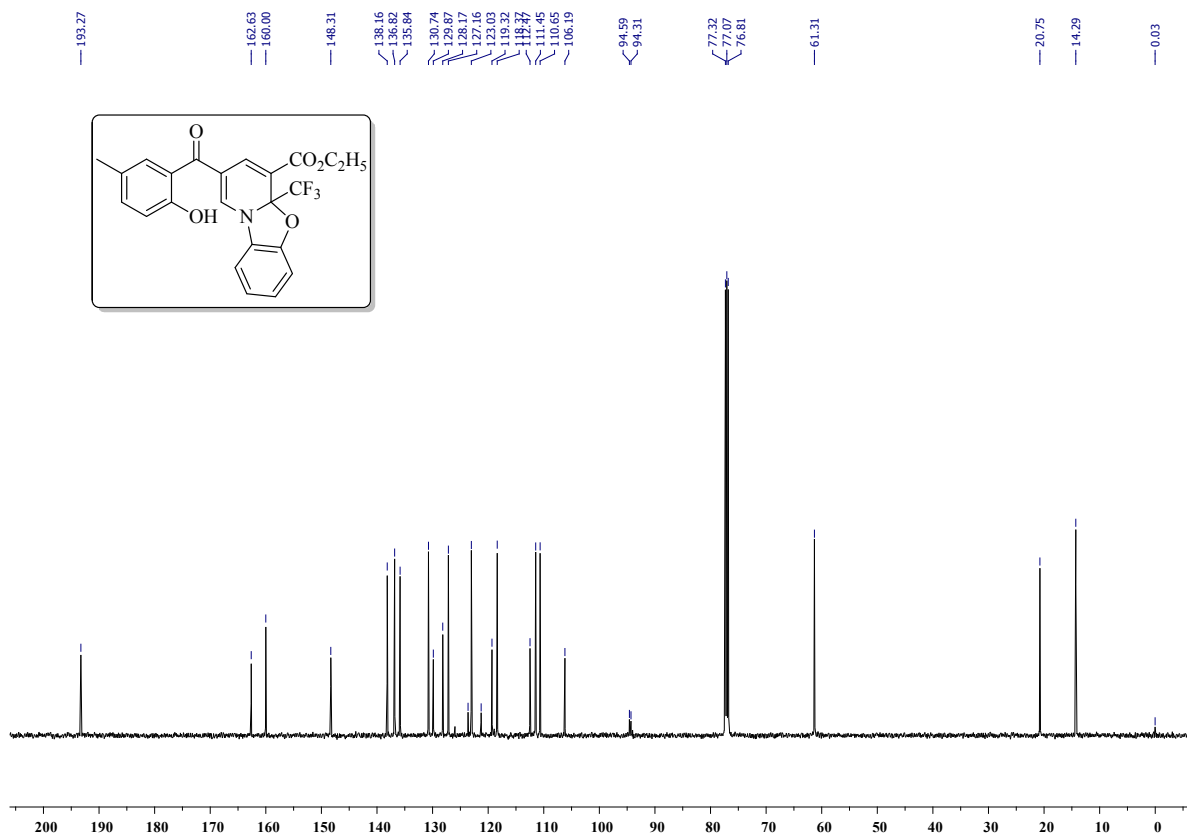

<sup>13</sup>C NMR spectrum of compound 7b

National Centre for Mass Spectrometry  
CSIR-Indian Institute of Chemical Technology

File Name C:\NICT-HRMS\30.09.2014\BCR-MEF-AP-CF3E  
Sample Name  
Sample ID K-RAJKUMAR  
Date and Time 30-09-14 16:20:34

BCR-MEF-AP-CF3E #2-31 RT: 0.02-0.31 AV: 30 SB: 93 0.80-1.90 NL: 4.05E6  
T: FTMS (1,1) + p ESI Full ms [110.00-2000.00]

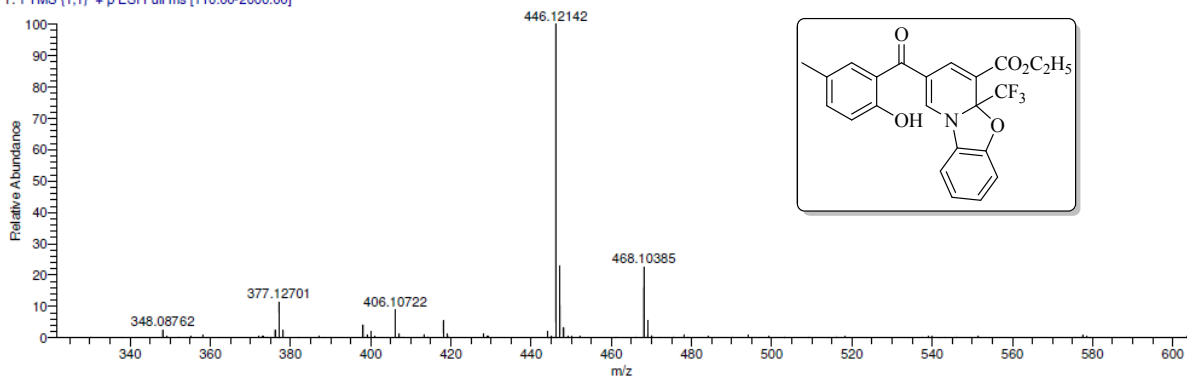

BCR-MEF-AP-CF3E#8-30 RT: 0.07-0.29 AV: 23  
T: FTMS (1,1) + p ESI Full ms [110.00-2000.00]  
m/z= 439.17-452.13

| m/z       | Intensity | Relative | Theo. Mass | Delta (ppm) | RDB equiv. | Composition                                                     |
|-----------|-----------|----------|------------|-------------|------------|-----------------------------------------------------------------|
| 446.12146 | 3677234.8 | 100.00   | 446.12098  | 0.48        | 13.5       | C <sub>23</sub> H <sub>19</sub> O <sub>5</sub> N F <sub>3</sub> |

HRMS spectrum of compound 7b

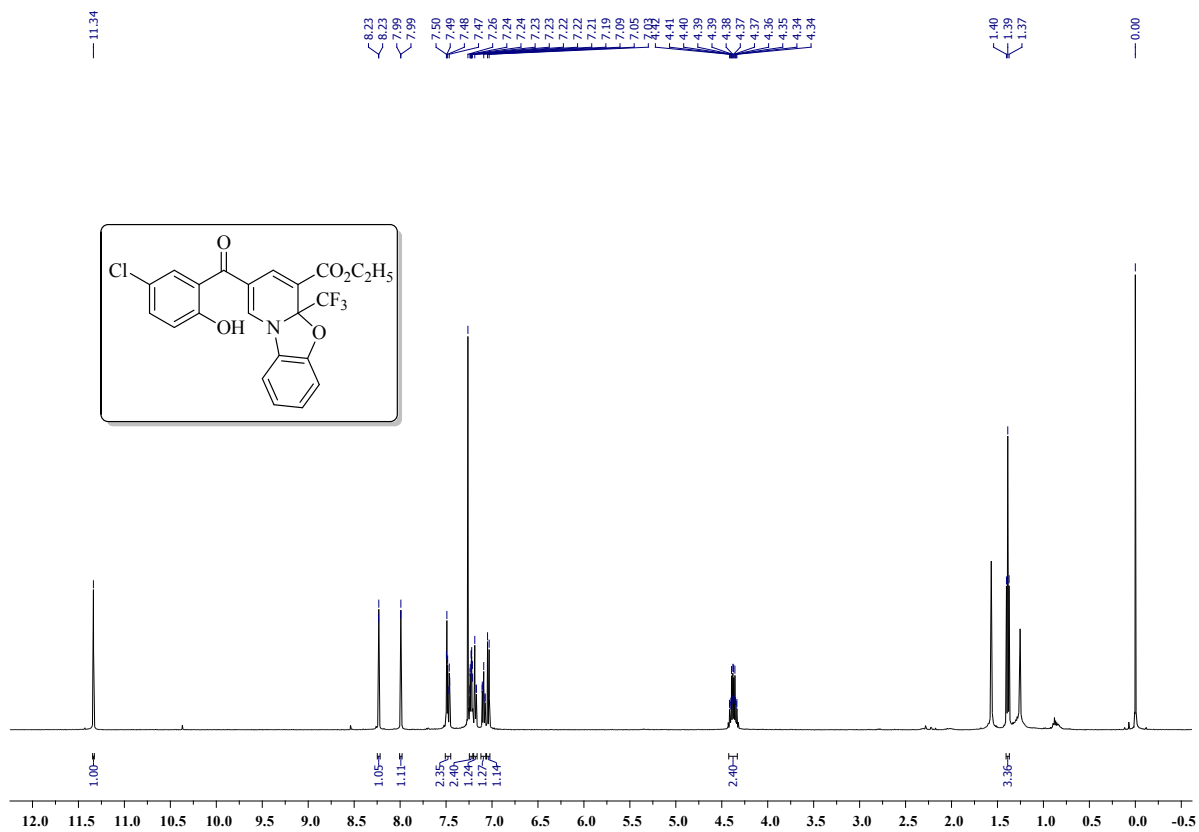

<sup>1</sup>H NMR spectrum of compound 7c

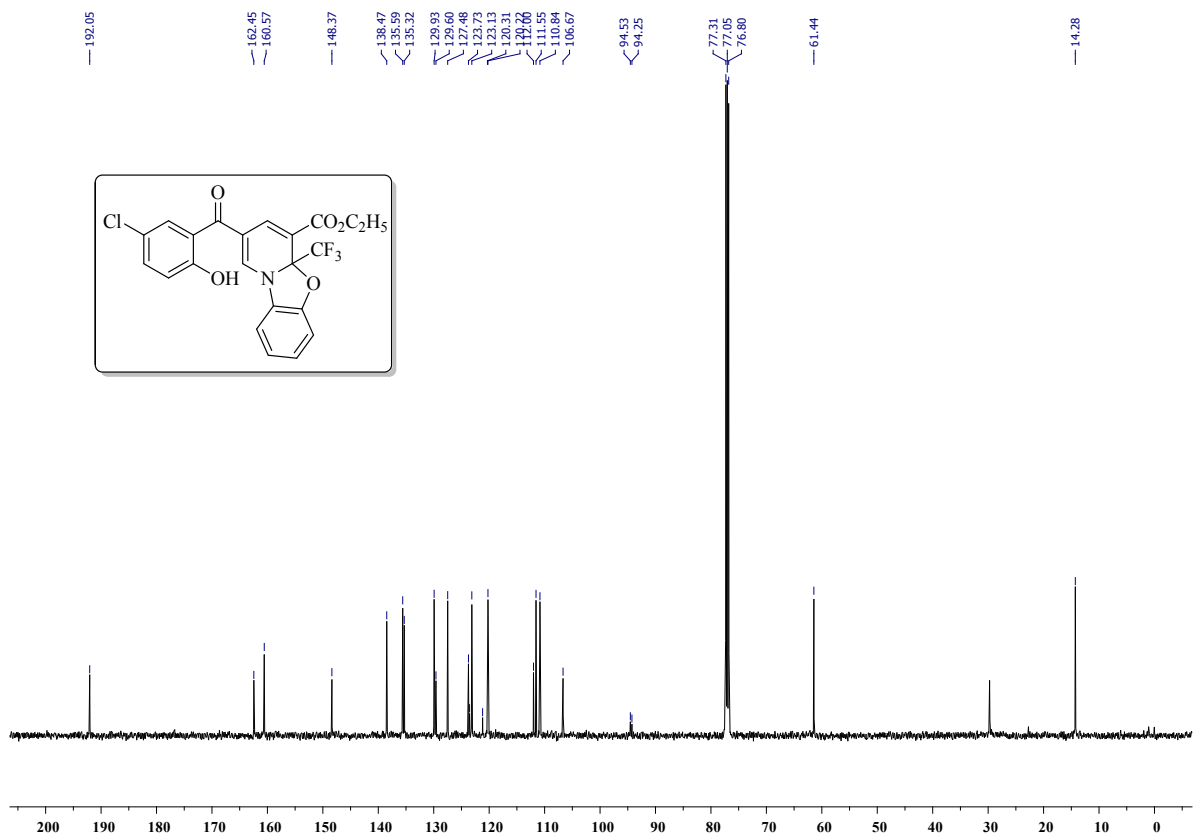

<sup>13</sup>C NMR spectrum of compound 7c

File Name C:\NICT-HRMS\...BCR-CLF-AP-CF3-EAA  
Sample Name  
Sample ID K-RAJKUMAR  
Date and Time 08-09-14 22:09:59  
BCR-CLF-AP-CF3-EAA#8-89 RT: 0.02-0.30 AV: 84 SB: 326 0.80-1.90 NL: 6.35E7  
T: FTMS (1,1) + p ESI Full ms [100.00-2000.00]

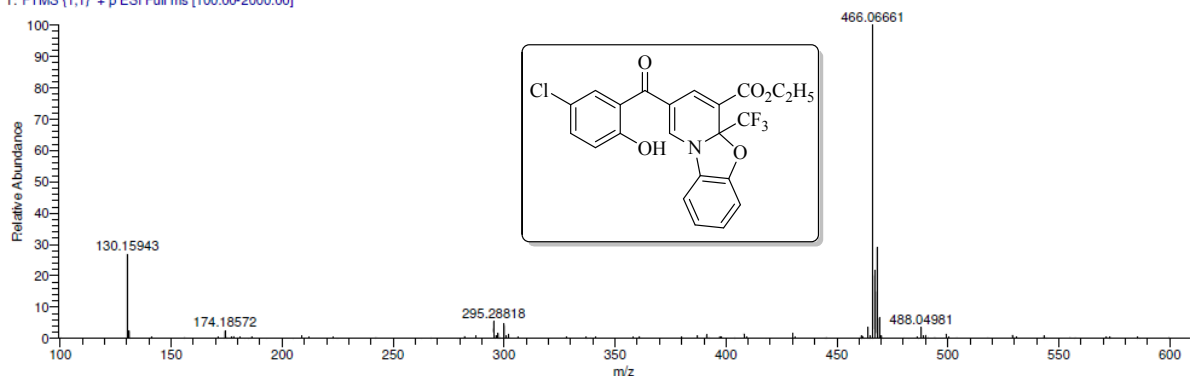

BCR-CLF-AP-CF3-EAA#8-30 RT: 0.03-0.10 AV: 23  
T: FTMS (1,1) + p ESI Full ms [100.00-2000.00]  
m/z = 433.97-498.33

| m/z       | Intensity  | Relative | Theo. Mass | Delta (ppm) | RDB equiv. | Composition                                                      |
|-----------|------------|----------|------------|-------------|------------|------------------------------------------------------------------|
| 466.06675 | 54684900.0 | 100.00   | 466.06636  | 0.83        | 13.5       | C <sub>22</sub> H <sub>16</sub> O <sub>5</sub> NClF <sub>3</sub> |

HRMS spectrum of compound 7c

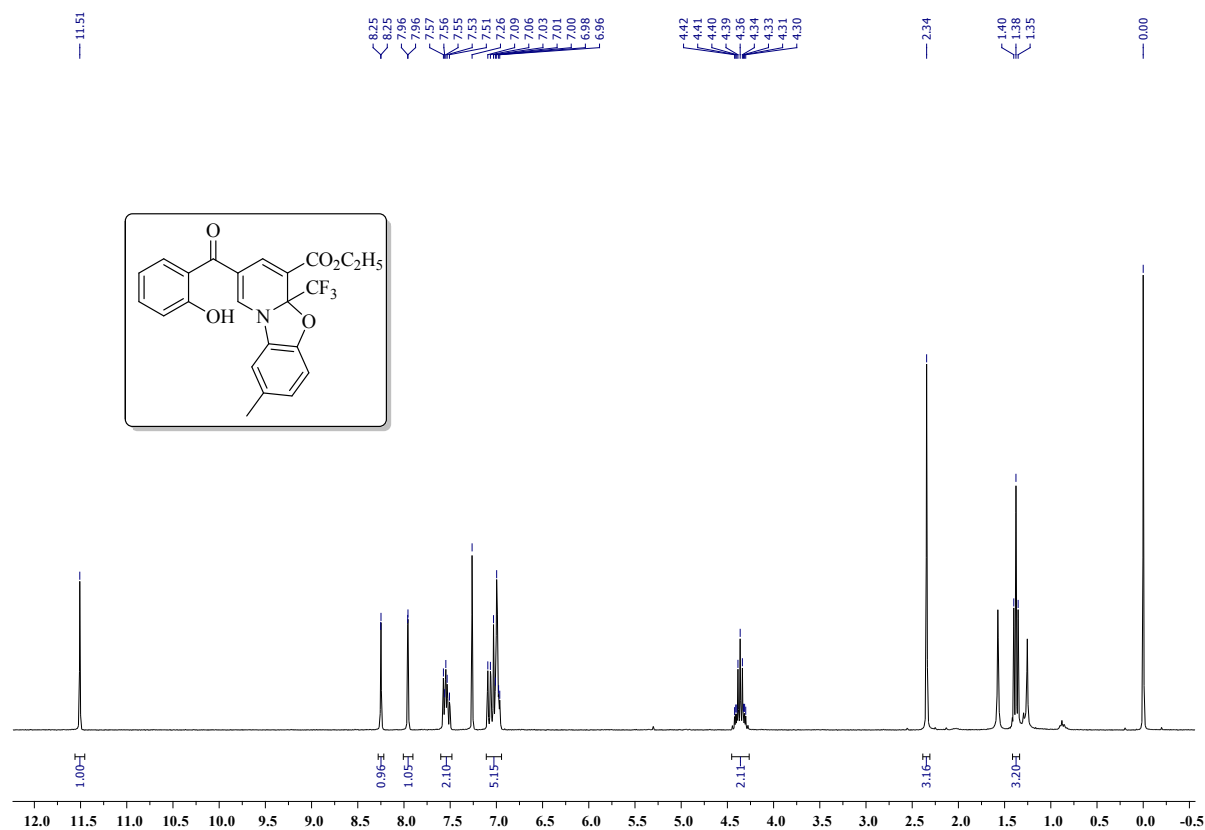

<sup>1</sup>H NMR spectrum of compound 7d



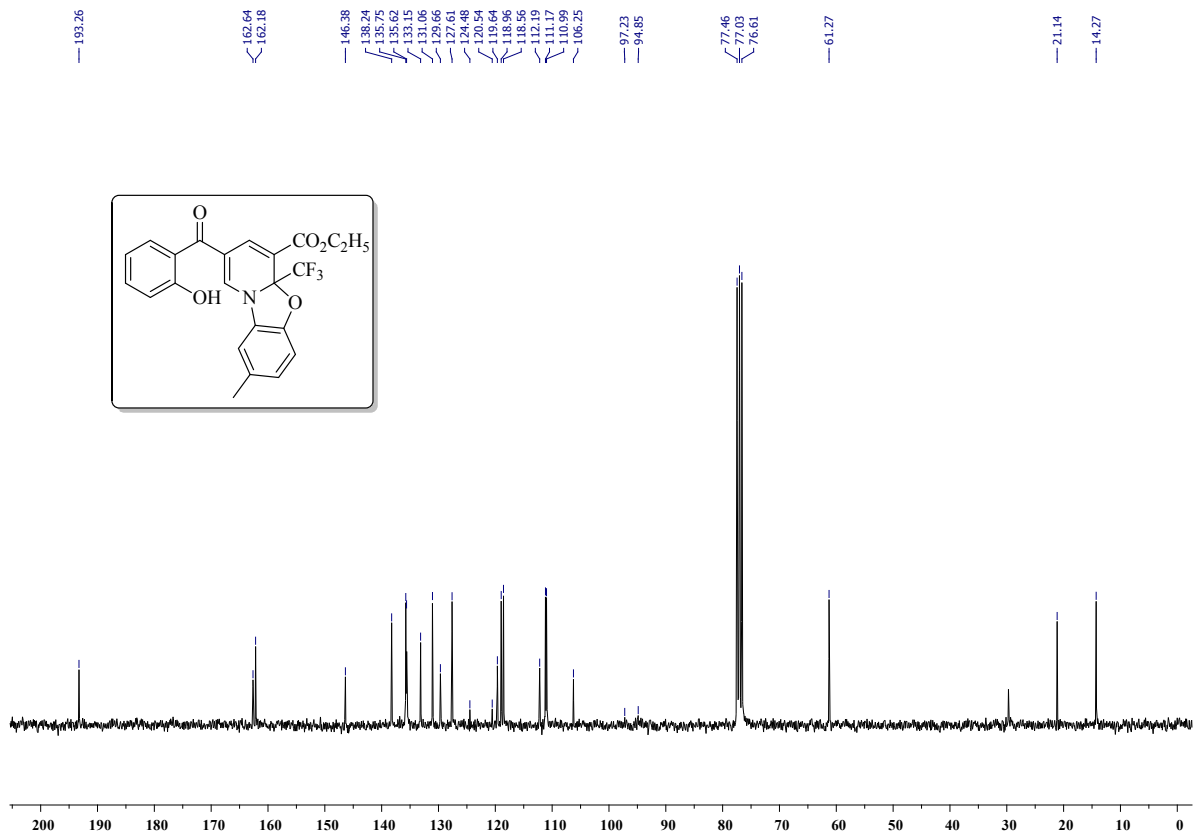

<sup>13</sup>C NMR spectrum of compound 7d

C:\ICT-HRMS\25.03.2014\BCR-FMAP-CF3

BCR-FMAP-CF3#4-87 RT: 0.02-0.30 AV: 84 SB: 326 0.80-1.90 NL: 1.48E7  
T: FTMS {1,1} + p ESI Full ms [100.00-2000.00]

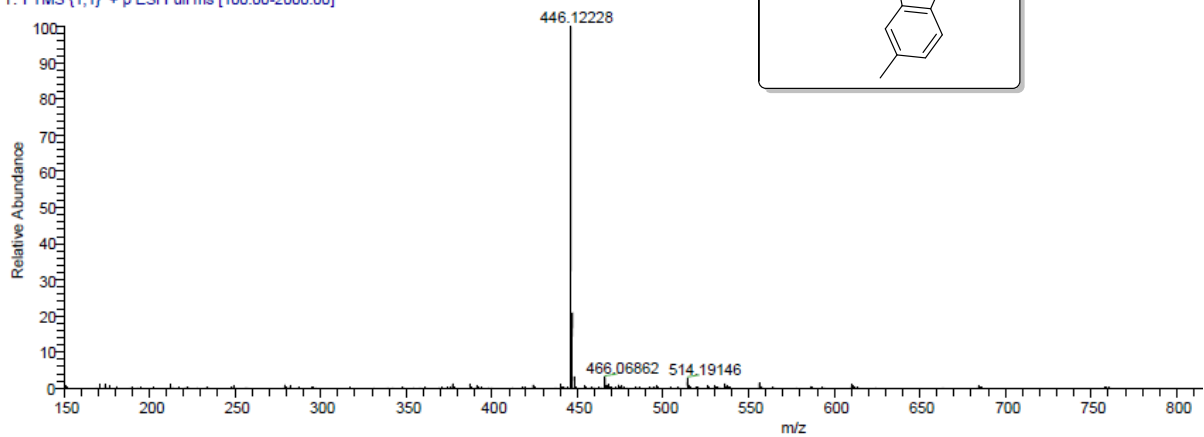

BCR-FMAP-CF3#8-30 RT: 0.03-0.11 AV: 23

T: FTMS {1,1} + p ESI Full ms [100.00-2000.00]

| m/z       | Intensity  | Relative | Theo. Mass | Delta (ppm) | RDB equiv. | Composition                                                     |
|-----------|------------|----------|------------|-------------|------------|-----------------------------------------------------------------|
| 446.12232 | 44656400.0 | 100.00   | 446.12098  | 3.01        | 13.5       | C <sub>23</sub> H <sub>19</sub> O <sub>5</sub> N F <sub>3</sub> |

HRMS spectrum of compound 7d

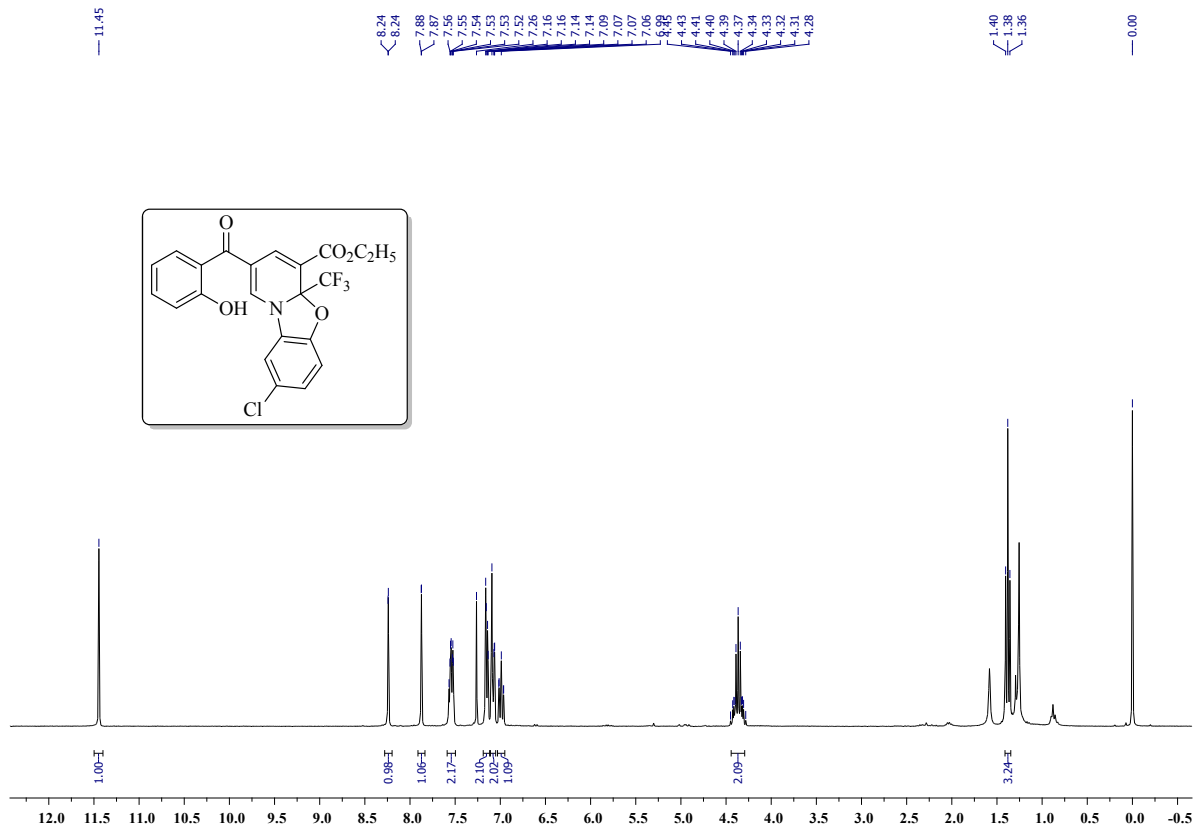

<sup>1</sup>H NMR spectrum of compound 7e

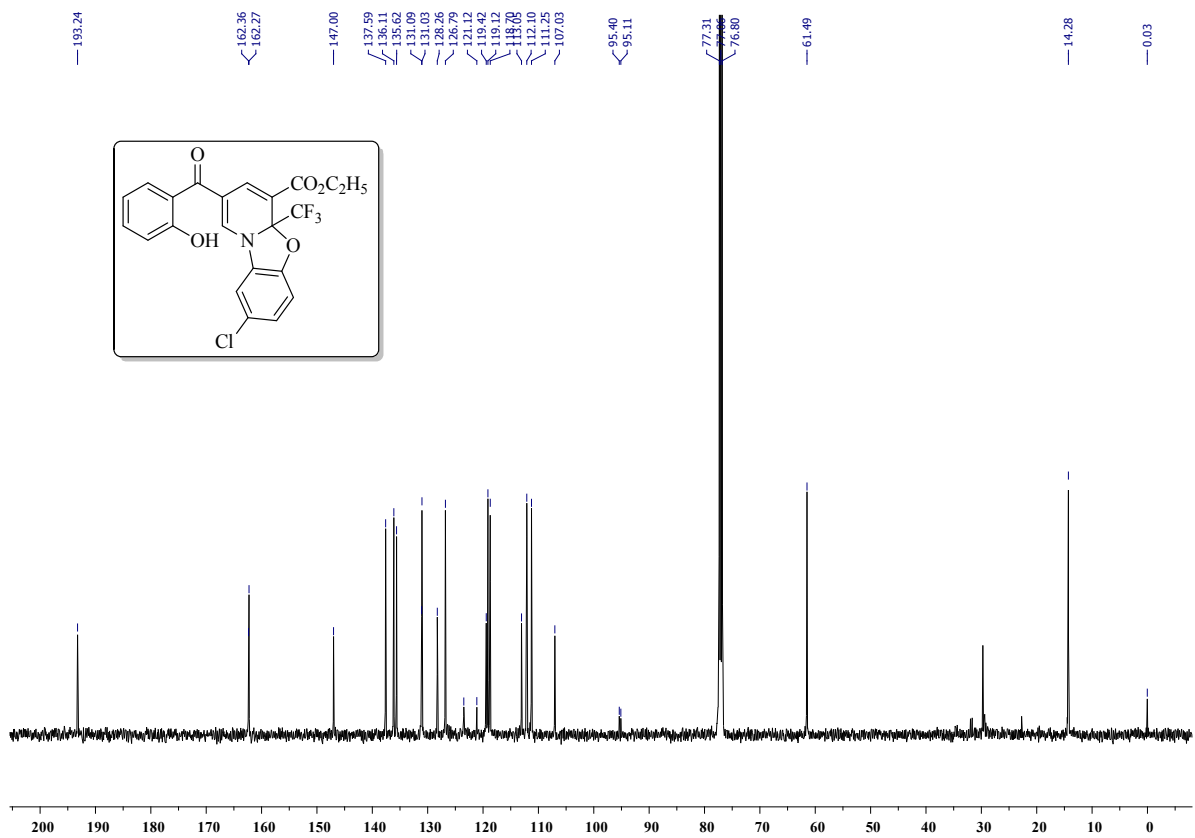

<sup>13</sup>C NMR spectrum of compound 7e

File Name C:\NICT-HRMS\25.03.2014\BCR-FCAP-CF3  
Sample Name K-RAJ-KUMAR  
Sample ID 1  
Date and Time 26-03-14 20:03:09  
BCR-FCAP-CF3#17.31 RT: 0.06-0.11 AV: 15 SB: 326 0.80-1.90 NL: 4.70E6  
T: FTMS (1,1) + p ESI Full ms [100.00-2000.00]

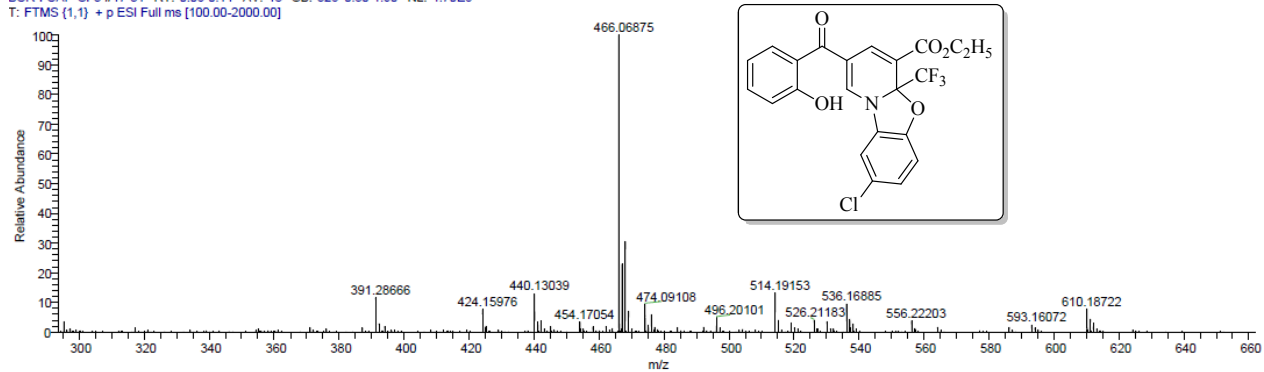

BCR-FCAP-CF3#8-30 RT: 0.03-0.11 AV: 23  
T: FTMS {1,1} + p ESI Full ms [100.00-2000.00]  
m/z= 463.67-470.70

| m/z       | Intensity | Relative | Theo. Mass | Delta (ppm) | RDB equiv. | Composition                                                      |
|-----------|-----------|----------|------------|-------------|------------|------------------------------------------------------------------|
| 466.06885 | 3698194.3 | 100.00   | 466.06636  | 5.34        | 13.5       | C <sub>22</sub> H <sub>16</sub> O <sub>5</sub> NClF <sub>3</sub> |

HRMS spectrum of compound 7e

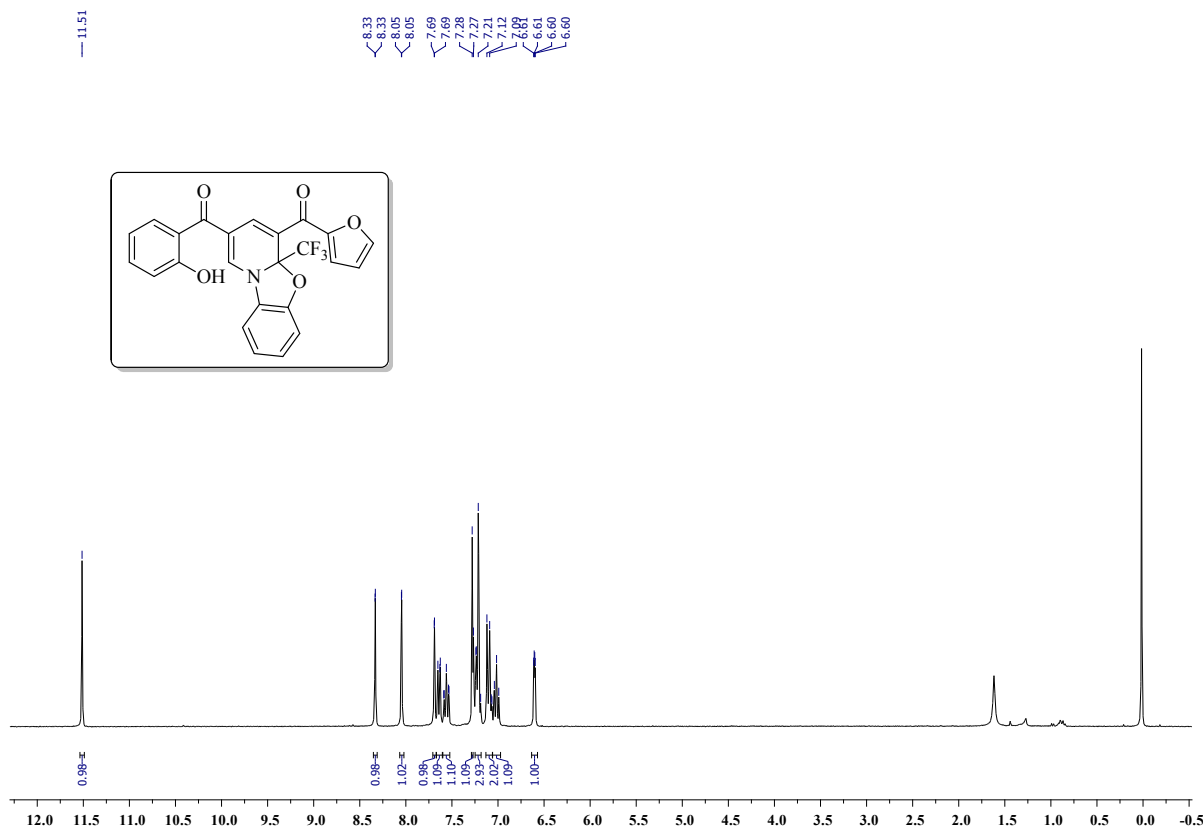

<sup>1</sup>H NMR spectrum of compound 7f

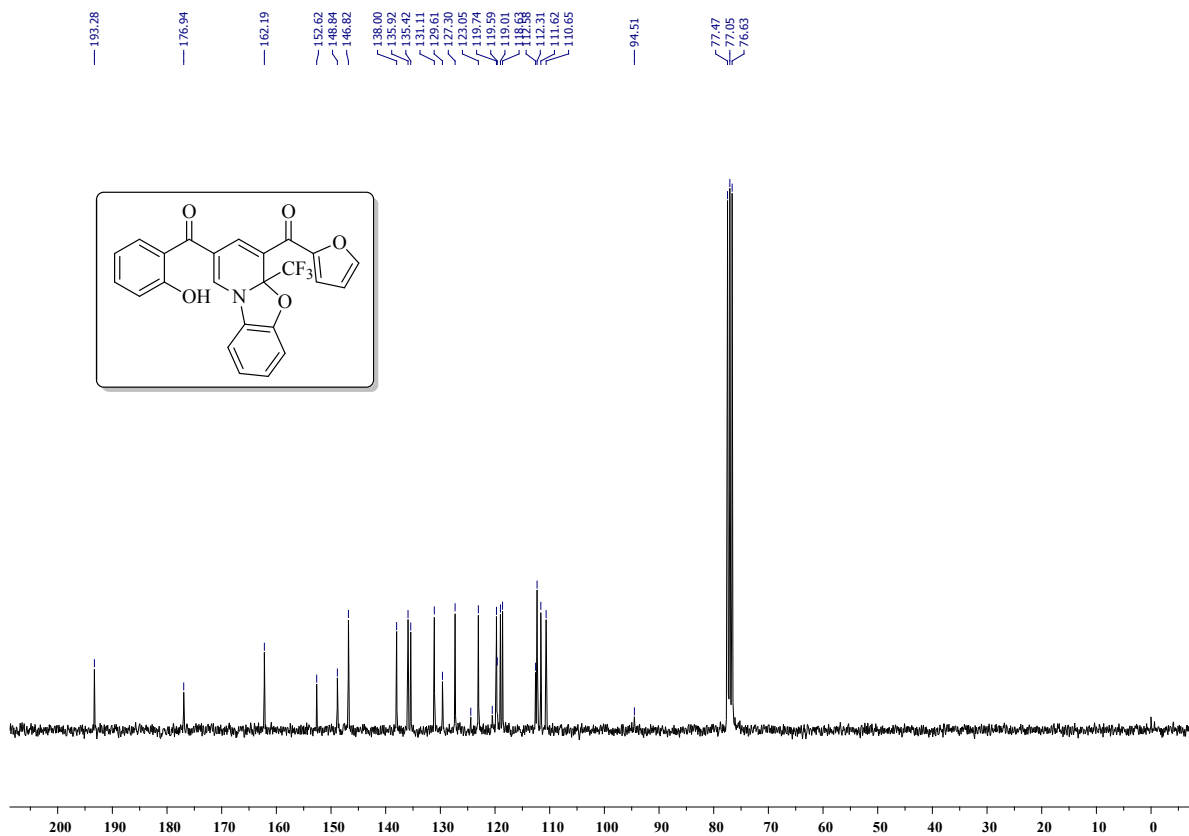

<sup>13</sup>C NMR spectrum of compound 7f

National Centre for Mass Spectrometry  
CSIR-Indian Institute of Chemical Technology

File Name C:\NICT-HRMS\...BCR-FAP-CF3-FU  
Sample Name  
Sample ID K-RAJKUMAR  
Date and Time 08-09-14 22:12:40  
BCR-FAP-CF3-FU #6-89 RT: 0.02-0.30 AV: 84 SB: 326 0.80-1.90 NL: 4.76E7  
T: FTMS (1,1) + p ESI Full ms [100.00-2000.00]

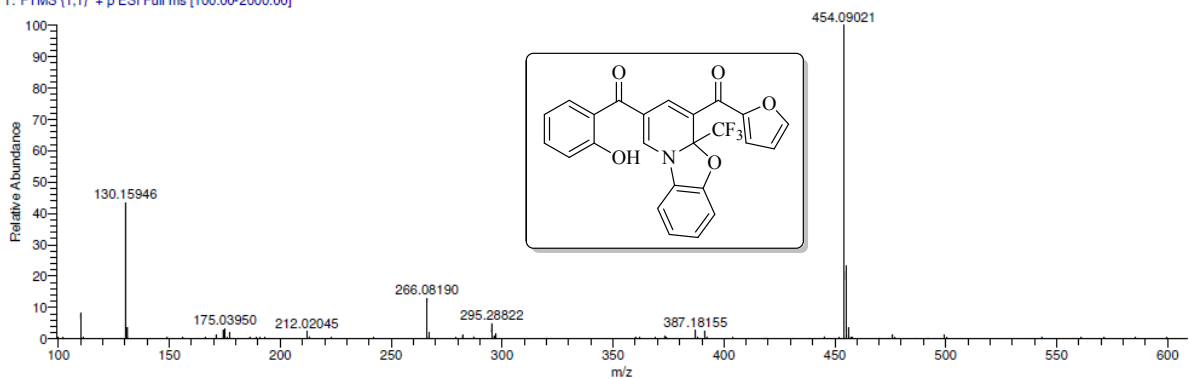

BCR-FAP-CF3-FU#8-30 RT: 0.03-0.10 AV: 23  
T: FTMS (1,1) + p ESI Full ms [100.00-2000.00]  
m/z= 438.26-472.58

| m/z       | Intensity  | Relative | Theo. Mass | Delta (ppm) | RDB equiv. | Composition                                                    |
|-----------|------------|----------|------------|-------------|------------|----------------------------------------------------------------|
| 454.09022 | 45002360.0 | 100.00   | 454.08968  | 1.18        | 16.5       | C <sub>24</sub> H <sub>15</sub> O <sub>5</sub> NF <sub>3</sub> |

HRMS spectrum of compound 7f
